# Supplementary material
Source: PubMed Central journal article supplement (PMC7173400)
Supplement: NIHMS1572386-supplement-PMID_31699932-Supplementary_Materials.pdf [file NIHMS1572386-supplement-PMID_31699932-Supplementary_Materials.pdf]

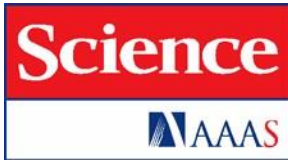

Supplementary Materials for  
**Double *PIK3CA* mutations in cis increase oncogenicity and sensitivity to  
PI3K $\alpha$  inhibitors**

Neil Vasan, Pedram Razavi\*, Jared L. Johnson\*, Hong Shao\*, Hardik Shah, Alesia Antoine, Erik Ladewig, Alexander Gorelick, Ting-Yu Lin, Eneda Toska, Guotai Xu, Abiha Kazmi, Matthew T. Chang, Barry S. Taylor, Maura N. Dickler, Komal Jhaveri, Sarat Chandarlapaty, Raul Rabadan, Ed Reznik, Melissa L. Smith, Robert Sebra, Frauke Schimmoller, Timothy R. Wilson, Lori S. Friedman, Lewis C. Cantley, Maurizio Scaltriti†, José Baselga†

\*These authors contributed equally to this work.

†Corresponding author. Email: scaltrim@mskcc.org (M.S.); jose.baselga@astrazeneca.com (J.B.)

Published 8 November 2019, *Science* **366**, 714 (2019)  
DOI: 10.1126/science.aaw9032

**This PDF file includes:**

Materials and Methods  
Supplementary Text  
Figs. S1 to S10  
Tables S1 to S4  
References

## **Materials and Methods:**

### **Mutational Data**

All cases reported with *PIK3CA* mutation were downloaded from [www.cbioportal.org](http://www.cbioportal.org) on September 18, 2018. Ten breast cancer studies were analyzed within the Breast Cancer cohort. Those cases not found in METABRIC and TCGA were combined as Breast Cancers (others). Cell line and xenograft studies were removed in Breast and Pan Cancer cohorts.

The MSK-IMPACT dataset consisted of 28139 tumor samples from patients who were prospectively sequenced as part of their active care at Memorial Sloan Kettering Cancer Center (MSKCC) between January 2014 and September 2018, as part of an Institutional Review Board-approved research protocol (NCT01775072). All patients provided written informed consent, in compliance with ethical regulations. The details of patient consent, sample acquisition, sequencing and mutational analysis have been previously published (19, 61). Briefly, matched tumor and blood specimens for each patient were sequenced using Memorial Sloan Kettering-integrated mutation profiling of actionable cancer targets (MSK-IMPACT)—an FDA-authorized hybridization capture-based next-generation sequencing assay, which analyzes all protein-coding exons and selected intronic and regulatory regions of 341 to 468 cancer-associated genes (19). All samples were sequenced with 1 of 3 incrementally larger versions of the IMPACT assay, including 341, 410, and 468 cancer-associated genes, respectively. All the versions of the MSK-IMPACT assay included all exonic regions of *PIK3CA*. Somatic mutations, DNA copy number alterations, and structural rearrangements were identified as previously described (19) and all mutations were manually reviewed. The tumors were categorized as containing single, double, or multiple *PIK3CA* mutations.



### **Codon enrichment analysis**

*PIK3CA* single and double mutant tumors were combined in the indicated cohorts. Tumors were analyzed for the frequency of a particular amino acid site mutation across the whole p110 $\alpha$  protein in double mutant tumors versus single mutant tumors, compared to chance, as assessed by Fisher's exact test. Resulting p values were corrected for multiple hypothesis testing with Benjamini and Hochberg method. We rejected the null hypotheses with a two-sided  $\alpha = 0.05$ .

### **Mutational phasing**

To determine the allelic configuration of multiple somatic mutations in the same gene and tumor, we implemented a computational framework for read-backed phasing. To this end, we exploited the fact that if two mutations were near enough in genomic position to be spanned by the same sequencing reads, then the identification of individual sequencing reads calling both variants at once unambiguously indicated that the different variants arose on the same DNA fragment, and therefore were in *cis* in the tumor genome. Conversely, if a large proportion of the reads spanning both mutations' loci called either mutation, but none called them both, and the two mutations were clonal enough to have arisen in the same cells, then this implied that the two mutations arose in *trans*. Briefly, when two or more mutations in the same gene were found in a sample in the tumor sequencing dataset, the tumor's raw sequencing data in BAM format was algorithmically queried using Samtools (version 1.3.1) (62) for the reads mapping to the loci of each mutation in that gene. The unique barcodes for the individual read-pairs calling each mutant allele were then obtained using the sam2tsv function from jvarkit (Lindenbaum P. (2015) JVarkit: java-based utilities for bioinformatics. *FigShare*, doi:10.6084/m9.figshare.1425030). By inspecting the barcodes calling the different mutant alleles in a gene, we called two mutations in *cis* if both mutations were called

by the same read-pair (in at least two distinct read-pairs, to mitigate false positives due to sequencing error). Conversely, we called two mutations in *trans* if their loci were spanned by at least 10 reads, but less than two called them both at once, and their cancer cell fractions (as estimated by the FACETS algorithm (version 0.3.9)) (27) summed to at least 100%, indicating that they likely arose in the same cancer cells.

### **Clonality analysis**

Clonality analyses was performed on the MSKCC cohort (9). Genome-wide total and allele-specific DNA copy numbers were determined using the FACETS algorithm (27) for tumors that underwent MSK-IMPACT tumor sequencing assay. Purity, average ploidy, and allele-specific integer-copy number for each segment were then determined by maximum likelihood. To determine the clonality of each mutation, we used allele-specific copy number inference from FACETS to calculate the fraction of mutated cancer cells (cancer cell fraction, CCF) as previously described (63). Clonal mutations were those with a CCF (assuming the number of mutant copies was equal to the number of copies of the more frequent allele) greater than 0.8 or with the upper bound of the CCF confidence interval  $> 0.85$ . Mutations with CCFs not meeting these conditions were defined as subclonal. Clonality assessment was adequate on 86 of the 99 double mutant patients, and final analysis was restricted to the cases with both major (i.e. E542K, E545K or H1047R) and minor mutations (i.e. E453X, E726X, or M1043X) (n=62). The binomial exact confidence intervals were calculated for the fraction of tumors in each category and the difference between fraction of samples in each major and minor clone clonality category was assessed using Fisher's exact test. The statistical hypothesis tests were two-sided with  $\alpha = 0.05$ .

### **Clinicopathologic and survival analyses**

For clinicopathologic analyses, METABRIC 2019 (64) and MSKCC cohorts (9) were analyzed. For METABRIC 2019 (n=1981), breast carcinoma cases (n=1964) were analyzed for *PIK3CA* mutational status: WT (n=1169), single mutant (n=681), and multiple mutant (n=114). For the MSKCC cohort (n=1918), cases were analyzed for *PIK3CA* mutational status: WT (n=1193), single mutant (n=626), and multiple mutant (n=99). Final analyses included the single and multiple mutant patients. p values were calculated by t-test (age) and chi square or Fisher's exact test, when appropriate.

For survival analyses, analysis was restricted to HR+/HER2- patients. Invasive disease-free survival, as defined by locoregional recurrence or distant recurrence whichever was first (65), was analyzed from the METABRIC 2019 cohort (64). Overall survival, as defined by time of metastatic recurrence until death or last follow up, was analyzed from the MSKCC cohort (9). For univariate analysis, p values were calculated using the log-rank test. For multivariate analyses, Cox proportional hazard models were utilized and adjusted for age, menopausal status, histology, stage at diagnosis, and receipt of chemotherapy, hormonal therapy, and radiotherapy. For the overall survival analysis, we further adjusted all the models for the late entry by left truncation. Late entry was defined as performing tumor sequencing to assess *PIK3CA* status after the metastatic recurrence. Therefore, for the time period between the metastatic diagnosis and tumor sequencing, the late entry patients are considered immortal. Adjusted for late entry bias was performed using left truncation method described in (66). We used the R package "survival" Kaplan-Meier survival function  $\text{surv}(t_1, t_2, \text{event})$ , where  $t_1$  is time interval between metastatic recurrence and tumor sequencing and  $t_2$  is time interval between metastatic recurrence and death or last follow-up.

### **Fresh frozen tumor acquisition**

Double *PIK3CA* mutant tumors were obtained on MSKCC IRB# 17-364. Patients were initially identified as having double *PIK3CA* mutant tumors by MSK-IMPACT on FFPE samples, then were consented to #17-364 for collection of fresh tumor biopsies.

### **RNA extraction and cDNA generation**

RNA was extracted from cell pellets ( $1 \times 10^7$  cells) using the RNeasy Mini Kit (Qiagen), as specified by the manufacturer. Briefly, cells were homogenized in 350  $\mu$ L lysis buffer (buffer RLT) by needle shearing, passing the resuspended pellet through a 20-gauge needle attached to a 5 mL syringe 10 times until a homogenous lysate was achieved. RNA extract from the lysate was then mixed with 70% ethanol and applied to the RNeasy spin column. Following the designated binding and wash steps, total RNA was eluted from the column twice using 30  $\mu$ L RNase free water for each elution, resulting in 60  $\mu$ L extracted RNA per sample. Upon extraction, total RNA was aliquoted and stored at  $-80$  °C for later use. Total cDNA for SMRT-seq was generated using the SuperScript IV First Strand Synthesis System for RT-PCR (part no. 18091050; Thermo Fisher Scientific) using 5  $\mu$ L total RNA input and the provided oligo (dT) to prime first-strand synthesis, according to the manufacturer's protocol. Aliquots of cDNA were stored at  $-20$  °C until needed for custom-primer, targeted *PIK3CA* amplification to achieve full-length molecules to phase variants of interest for diagnostic purposes. Total cDNA for Sanger sequencing was generated using the iScript cDNA Synthesis Kit (Bio-Rad).

### **Sanger sequencing**

BT20, CAL148, HCC202, and MDA-MB-361 cells were purchased from ATCC. Fresh frozen tumors were acquired from MSKCC IRB #17-364, and samples were homogenized in RIPA buffer

supplemented with protease and phosphatase inhibitors (Roche). Full length *PIK3CA* cDNA was amplified using Taq polymerase to generate 3' A-tailed fragments and purified using a Qiaquick Gel Extraction kit (Qiagen). Full length *PIK3CA* cDNA was ligated into pGEM-T (Promega), transformed into *E. coli*, and plated on LB plates containing ampicillin, IPTG, and X-Gal for blue and white colony selection. White colonies were selected, miniprep plasmid DNA was isolated (Qiagen), and were submitted for Sanger sequencing.

### ***PIK3CA* amplification for SMRT-seq**

Targeted *PIK3CA* amplification was performed using polymerase chain reaction (PCR) with High Performance Liquid Chromatography (HPLC)-purified SMRT-seq primers. SMRT-seq primers were:

Forward: TGGGACCCGATGCGGTTA  
Reverse: AATCGGTCTTTGCCTGCTGA

The primers were synthesized at Integrated DNA Technologies, purified, and diluted to 10  $\mu$ M in 0.1X TE buffer before use. Each reaction totaled 50  $\mu$ L and consisted of 5  $\mu$ L total cDNA, 5  $\mu$ L 10X LA PCR Buffer II (Mg<sup>2+</sup> plus), 8  $\mu$ L of 2.5 mM dNTP mix, 2  $\mu$ L each of *PIK3CA*-F and *PIK3CA*-R, 27.5  $\mu$ L of nuclease free water, and 0.5  $\mu$ L of LA-Taq polymerase (part no. RR02C, Takara Bio). Reactions were heated to 98 °C for 3 minutes and then subjected to 32 cycles of PCR using the following parameters: 25-sec denaturation at 98 °C, followed by 15-sec annealing at 55 °C, followed by 8-min extension at 68 °C. After the 32<sup>nd</sup> cycle, the reactions were incubated for 15 min at 68 °C and then held at 4 °C. *PIK3CA* amplicons were purified from PCR reactions using 1X AMPure PB beads, as described by the manufacturer (part no. 100-265-900, Pacific Biosciences). *PIK3CA* amplicons were visualized and quantified using the 2100 Bioanalyzer System with the DNA 12000 kit (Agilent Biosciences).

### **SMRTbell library preparation and sequencing**

SMRTbell template libraries of the ~3.3-kb *PIK3CA* amplicon insert size were prepared according to the manufacturer's instructions using the SMRTbell Template Prep Kit 1.0 (part no. 100-259-100; Pacific Biosciences). A total of 250 ng of purified *PIK3CA* amplicon was added directly into the DNA damage repair step of the Amplicon Template Preparation and Sequencing protocol. Library quality and quantity were assessed using the DNA 12000 Kit and the 2100 Bioanalyzer System (Agilent), as well as the Qubit dsDNA Broad Range Assay kit and Qubit Fluorometer (Thermo Fisher). Sequencing primer annealing and P6 polymerase binding were performed using the recommended 20:1 primer:template ratio and 10:1 polymerase:template ratio, respectively. SMRT sequencing was performed on the PacBio RS II using the C4 sequencing kit with magnetic bead loading and one-cell-per-well protocol and 240-minute movies.

### **SMRT-seq haplotype generation and variant calling**

To generate haplotypes and identify variants, data were processed by the Minor Variants Analysis Tool as part of the SMRTLink 5.1 bioinformatics suite (Pacific Biosciences) using NM\_006218.3, the NCBI Reference Sequence for *PIK3CA*. Briefly, circular consensus sequence (CCS) reads were generated and filtered on reads that were  $\geq 99.9\%$  (Q30) accurate as input for haplotype and variant analysis. A conservative 5% variant frequency threshold was also applied, such that the phased haplotypes were generated using variants called with very high confidence. Phased haplotypes indicated those variants that were present in *cis*- or *trans*- within each selected sample.

### **Mutagenesis and cloning**

We cloned *PIK3CA* without affinity tags, as N-terminal tags artificially increase kinase activity and C-terminal tags may interfere with membrane binding (42, 67). pBabe puro HA *PIK3CA* was a gift from Jean Zhao (Addgene plasmid #12522). pcDNA 3.4-*PIK3CA* untagged WT vector was obtained as a gift from Lewis Cantley (Weill Cornell Medical Center). For pBabe puro HA *PIK3CA* and pcDNA 3.4-*PIK3CA*, the SNP coding for I143V was mutated back to the WT isoleucine by site-directed mutagenesis. For pBabe puro HA *PIK3CA*, the N-terminal HA tag was deleted by site-directed mutagenesis. pDONR223\_ *PIK3CA*\_WT was a gift from Jesse Boehm & William Hahn & David Root (Addgene plasmid # 81736). For pDONR223\_ *PIK3CA*\_WT, a C-terminal stop codon was inserted by site-directed mutagenesis. In total, these modifications resulted in untagged WT *PIK3CA* in the various plasmids. Onto these WT backbones, E545K and H1047R mutants were cloned. After this first round of mutagenesis, E453Q, E726K, and M1043L were cloned into the E545K and H1047R plasmids to create double *cis* mutants. pLX302 was a gift from David Root (Addgene plasmid # 25896). pDONR plasmids were recombined with the pLX-302 acceptor plasmid using Gateway LR Clonase II Enzyme mix (Thermo Fisher). Plasmid backbone mutagenesis primers were:

*PIK3CA* WT C-terminal stop codon (pDONR223)

Forward: CATGCATTGAACTGATTGCCAACTTTC

Reverse: GAAAGTTGGCAATCAGTTCAATGCATG

*PIK3CA* V143I to WT isoleucine

Forward: GACTTCCGAAGAAATATTCTGAACGTTTGTA

Reverse: TTTACAAACGTTTCAGAATATTTCTTCGGAAGTC

*PIK3CA* N-terminal HA tag removal (pBabe puro Myr HA *PIK3CA*)

Forward: GATCCAAGCTTCACCATGCCTCCAAGACCATCATCA

Reverse: TGATGATGGTCTTGGAGGCATGGTGAAGCTTGGATC

*PIK3CA* mutagenesis primers were:

E545K

Forward: CCTCTCTCTGAAATCACTAAGCAGGAGAAAGATTTTC

Reverse: GAAAATCTTTCTCCTGCTTAGTGATTTTCAGAGAGAGG'

H1047R

Forward: CAAATGAATGATGCACGTCATGGTGGCTGGAC

Reverse: GTCCAGCCACCATGACGTGCATCATTCAATTTG'

E453Q

Forward: CCAGTACCTCATGGATTACAGGATTTGCTGAACCCTATTG

Reverse: CAATAGGGTTCAGCAAATCCTGTAATCCATGAGGTAAGTGG

E726K

Forward: GAGAAGAAGGATAAAACACAAAAGGTAC

Reverse: GTACCTTTTGTGTTTTATCCTTCTTCTC

M1043L

Forward: GTATTTTCATGAAACAACCTGAATGATGCACATCATGGTGGCTGGAC

Reverse: GTCCAGCCACCATGATGTGCATCATTCAAGTTGTTTCATGAAATAC

### **Cell lines, retroviral, and lentiviral production, and drugs**

All cell lines were purchased from ATCC except for MCF7 [*PIK3CA* WT] cells which were obtained as a gift from Josh Loring (Johns Hopkins University). NIH-3T3 cells were maintained in DMEM media supplemented with 10% FCS and 1% Pen/Strep. MCF-10A cells were maintained in DMEM media supplemented with 5% filtered horse serum (Invitrogen), EGF (20 ng/ $\mu$ L) (Sigma), hydrocortisone (0.5 mg/mL) (Sigma), cholera toxin (100 mg/mL) (Sigma), insulin (10  $\mu$ g/mL) (Sigma), and 1% penicillin/streptomycin. MCF7 cells and 293T cells were maintained in DMEM media supplemented with 10% FBS and 1% Pen/Strep. Cells were used at low passages and were incubated at 37°C in 5% CO<sub>2</sub>.

For retroviral and lentiviral production,  $7 \times 10^6$  293T cells were seeded in 10-cm plates and transfected with the plasmid of interest, pCMV-VSVG, and pCMV-dR8.2 (for lentivirus) using Jetprime (Polyplus Transfection). Viruses were harvested 48 hours after transfection and were filtered through a 0.45  $\mu$ m filter (Millipore). Target cells were infected using fresh viral



supernatants and were selected using puromycin (2  $\mu\text{g}/\text{mL}$ ) to obtain stable clones. For *trans* mutants, a 1:1 ratio of viruses was infected. Cell lines were genotyped to confirm the presence of the *PIK3CA* cDNA sequence. Alpelisib and everolimus were purchased (Selleck). GDC-0077 was obtained on MTA from Genentech.

### **Cell proliferation assays**

MCF10A cell lines were seeded in serum starved media (MCF10A media without EGF or insulin), at 10000 cells/mL in 12 well plates. Cells were grown, and time points were collected daily from 0-4 days and fixed in formalin. Formalin fixed cells were developed using crystal violet and pictures were taken for day 4 growth. Acetic acid was added and OD<sub>595</sub> was obtained. OD values were normalized to day 0 for each cell lines and plotted.

### **Western blotting**

MCF10A, NIH-3T3 cells, and MCF7 cells were seeded in normal growth medium, either 4 million cells in 10 cm dishes or 400000 cells in 6 cm plates. 24 hours later, cells were washed twice with PBS then refreshed with serum starved media. Serum starved media for MCF10A cells used MCF10A media with 5% horse serum and without EGF or insulin. Serum starved media for NIH-3T3 and MCF7 cells used 0.1% FCS and 0.1% FBS, respectively. For growth factor stimulation experiments, PDGF-BB (20 ng/mL) was added for 30 minutes, and IGF-1 (10 nM) was added for 10 minutes, after serum starvation. For drugging experiments cells were washed twice with PBS then refreshed with serum starved media with DMSO or 1 $\mu\text{M}$  alpelisib or 62.5 nM GDC-0077 (the IC<sub>50</sub> [GDC-0077] of MCF10A E545K cells per Fig. 4d) for the indicated time points. Cells were washed with PBS twice, and lysed in RIPA buffer supplemented with protease and phosphatase

inhibitors (Roche). Allograft tumor samples were also lysed in RIPA buffer supplemented with protease and phosphatase inhibitors. Protein extracts were quantified and normalized (NuPage), separated using SDS-PAGE gels, and transferred to PVDF membranes. All primary antibodies were diluted 1:1000 and anti-rabbit IgG secondary antibody (GE Healthcare) (1:4000) was used. Membranes were probed using specific antibodies. p110 $\alpha$  (#4249), pAKT (S473) (#4060), pAKT (T308) (#13038), total AKT (#4691), pPRAS40 (T246) (#13175), pS6 (S240/244) (#5364), pS6 (S235/236) (#4858), total S6 (#2217), pERK1/2 (T202/Y204) (#4370), total ERK (#4695), and vinculin (#13901) were purchased from Cell Signaling Technology (CST). All primary antibodies were diluted 1:1000 and anti-rabbit IgG secondary antibody (GE Healthcare) (1:4000) was used. For quantification, densitometry was performed using ImageJ (68).

### **Mouse allografts**

Animals were maintained and treated in accordance with Institutional Guidelines of Memorial Sloan Kettering Cancer Center (Protocol number 12-10-019).  $5 \times 10^6$  NIH-3T3 cells in 1:1 PBS/Matrigel (Corning) were injected subcutaneously into six-week-old female athymic nude mice. When tumors reached a volume of  $\sim 150\text{mm}^3$ , mice measured twice a week during a month. 4 tumors per group were used in these studies. For statistical analysis, outliers were removed using Grubbs' test ( $\alpha = 0.05$ ). Tumors were harvested at the end of the experiment, fixed in 4% formaldehyde in PBS, and paraffin-embedded. IHC was performed on a BOND RX processor platform (Leica) using standard protocols with BOND Epitope Retrieval Solution 2 (Leica). Primary staining with pAKT (S473) (D9E) (#4060), 1:100 (CST) for 30 minutes was followed by staining with a Bond Polymer Refine Detection kit (Leica) for 60 minutes. Studies were performed in compliance with MSKCC institutional guidelines under an IACUC approved protocol. The

animals were immediately euthanized as soon as investigators were notified that the tumors reached the IACUC set limitations.

### **Structural mapping**

PI3K structural mapping was performed on PDB 2RD0, 3HHM, and 4OVU using PyMOL (69).

### **Protein expression and purification**

EXPI-293F cells (Thermo Fisher) were incubated at 37 °C in 8% CO<sub>2</sub>, in spinner flasks on an orbital shaker at 125 rpm in Expi293 Expression Medium (Thermo Fisher). pcDNA 3.4-FLAG-His<sub>6</sub>-TEV-PIK3R1 plasmid was obtained as a gift from the laboratory of Lewis Cantley (Weill Cornell Medical Center). 300 µg of pcDNA 3.4-PIK3CA and 200 µg pcDNA 3.4-PIK3R1 were combined and diluted in Opti-MEM I Reduced Serum Medium (Thermo Fisher). ExpiFectamine 293 Reagent (Thermo Fisher) was diluted with Opti-MEM separately then combined with diluted plasmid DNA for 10 minutes at room temperature. The mixture was then transferred slowly to 500 mL EXPI-293F cells (3 x 10<sup>6</sup> cells/mL) and incubated. 24 hours later, ExpiFectamine 293 Transfection Enhancer 1 and Enhancer 2 (Thermo Fisher) were added. Cells were harvested 3 days after transfection and centrifuged at 4000 rpm for 30 minutes and frozen at -20°C.

All steps of protein purification were performed at 4°C. Cell pellets were solubilized in lysis buffer (50 mM Tris pH 8.0, 400 mM NaCl, 2 mM MgCl<sub>2</sub>, 5% glycerol, 1% Triton X-100, 5 mM β-mercaptoethanol, 20 mM imidazole) supplemented with EDTA-free protease inhibitor (Sigma) and lysed using a Dounce homogenizer for 20 strokes. Lysates were centrifuged at 14000 rpm for 60 minutes and clarified lysates were affinity purified on Ni-NTA resin (Qiagen) by batch binding

for 1 hour. Resin was washed with 10 column volumes of lysis buffer (50 mM Tris pH 8.0, 500 mM NaCl, 2 mM MgCl<sub>2</sub>, 2% glycerol, 20 mM imidazole) and eluted in 10 column volumes of elution buffer (50 mM Tris pH 8.0, 100 mM NaCl, 2 mM MgCl<sub>2</sub>, 2% glycerol, 1mM TCEP, 250 mM imidazole). Eluted protein was buffer exchanged with elution buffer without imidazole, concentrated using 100 kDa Ultra Centrifugal Filter Units (Amicon), and flash frozen in liquid nitrogen with 20% glycerol. Concentrations of PI3K complexes used in all biochemistry experiments were normalized by Western blotting for p110 $\alpha$  as compared to 1  $\mu$ g WT PI3K complex.

### **Thermal shift assays**

1  $\mu$ g of PI3K complex was added to 10  $\mu$ L 5x Assay Buffer I (SignalChem), 2  $\mu$ L ATP (1 mM), and 1  $\mu$ L BSA (2 mg/mL) and distilled water to a total volume of 50  $\mu$ L into each tube of a MicroAmp Optical 8-Cap strip (Thermo Fisher) at room temperature. For each experiment, one 8-cap strip was prepared per PI3K construct. Tubes were placed in a C1000 Touch Thermocycler (BioRad). Samples were cycled at 46 °C for 30 seconds, then on a temperature gradient from 46 °C – 61.7 °C for 3 minutes, then 25 °C for 3 minutes. Samples were spun in a Minispin centrifuge for 30 seconds and 40  $\mu$ L of the supernatant was transferred to separate Eppendorf tubes. Tubes were centrifuged at 15000 rpm for 20 minutes at 4 °C. 30  $\mu$ L of the supernatant was transferred to separate Eppendorf tubes with SDS buffer. Samples were loaded and soluble p110 $\alpha$  was probed by Western blotting across the temperature gradient with anti-p110 $\alpha$  antibody to determine the temperature at which p110 $\alpha$  becomes insoluble. For quantification, densitometry was performed using ImageJ (68). Western blot densitometry measurements were normalized to the densitometry

of the lowest temperature point (46 °C), curves were fit to a Boltzmann sigmoid function, and melting temperatures ( $T_m$  (50%)) were determined.

### **Liposome preparation and liposome sedimentation assays**

PS, PE, and PI were purchased (Avanti) and cholesterol was purchased (Nu Chek Prep). Anionic lipid stocks were prepared at 10 mg/mL in HPLC-grade chloroform from using molar percentages of 35% PE, 25% PS, 5% PI, and 35% cholesterol. PIP<sub>2</sub> lipid stocks were prepared at 35% PE, 25% PS, 4.9% PI, 0.1% PIP<sub>2</sub>, and 35% cholesterol. A gentle stream of argon gas was applied for 15 seconds and tubes were frozen and stored at -20 °C. Prior to experiments, the lipid stocks were vortexed and 100 µL of chloroform (HPLC-grade) was transferred to a clean glass vial. Argon gas was immediately applied to the stock tube, capped, and stored at -20 °C. Argon gas was applied the 100 µL aliquot leaving a translucent lipid film. 2 mL of 1x filter-sterilized TBSM buffer (50 mM Tris pH 8.0, 50 mM NaCl, 5 mM MgCl<sub>2</sub>) was added and lipids were hydrated at room temperature for 1 hour. Liposomes were extruded 15 times through a 0.8 µm membrane using a Mini-Extruder kit (Avanti). Liposomes were transferred to a clean Eppendorf tube and centrifuged at 15000 rpm for 8 minutes. Supernatant was discarded, and the lipid pellet was resuspended in 100 µL TBSM buffer vigorously until resuspended. 900 µL of TBSM was added for a final volume of 1 mL. Differential light scattering was performed to assess size of the liposome population. 1 µg of PI3K complex in PBS was added to 70 µL liposomes (10 mg/mL) in a total volume of 100 µL. Binding reactions proceeded for 30 minutes at room temperature. Solutions were centrifuged at 15000 rpm for 15 minutes and supernatant was removed by aspiration. Lipid pellets were mixed with 50 µL SDS buffer, and the amount of bound p110α was probed by Western blotting. For

quantification, densitometry was performed using ImageJ (68) and measurements were normalized to the densitometry of WT PI3K.

### **Lipid kinase assays**

For triplicate kinase reactions, radioactive ATP buffer, protein, and PIP<sub>2</sub> master mixes were assembled. The radioactive ATP buffer master mix contained 1100  $\mu$ L 5x Assay Buffer I (SignalChem), 55  $\mu$ L ATP (10 mM), 55  $\mu$ L BSA (2 mg/mL), 55  $\mu$ L <sup>32</sup>P-labeled ATP (0.01 mCi/ $\mu$ L), and 2805  $\mu$ L distilled water. The protein master mix contained 4  $\mu$ g PI3K complex in 16  $\mu$ L total volume. The PIP<sub>2</sub> master mix contained 50  $\mu$ L PIP<sub>2</sub> (Avanti) and 450  $\mu$ L distilled water. For each construct, 296  $\mu$ L buffer master mix was combined with 14  $\mu$ L protein master mix (buffer + protein master mix) and was mixed well by pipetting. 90  $\mu$ L of the buffer + protein master mix was aliquoted in triplicate, corresponding to a total amount of 1.016  $\mu$ g PI3K complex per reaction. To this was added 10  $\mu$ L of PIP<sub>2</sub> master mix (100  $\mu$ L total volume per reaction) and the solution was mixed well by pipetting to start the reaction. Kinase reactions proceeded at 30°C for 10 minutes. 50  $\mu$ L of HCl (4N) was added to quench the reaction followed by 100  $\mu$ L of 1:1 methanol-chloroform. Tubes were vortexed for 30 seconds each and centrifuged at 15000 rpm for 10 minutes. Using gel loading pipet tips pipetted with chloroform in and out, 20  $\mu$ L of the bottom hydrophobic phase was removed and spotted onto a TLC plate (EMD Millipore, M1164870001). Plates were placed in a sealed chamber with 65:35 1-propanol and 2M acetic acid and TLC was run overnight. Plates were exposed to a phosphor screen for 4 hours and imaged on a Typhoon FLA 7000.

### **IC<sub>50</sub> determination of recombinant PI3K**

We used the Transcreener ADP<sup>2</sup> fluorescence intensity assay (Bellbrook Labs) to determine IC<sub>50</sub> values for PI3K $\alpha$  inhibitors with recombinant PI3K $\alpha$ . A standard curve was prepared with varied concentrations of ATP and ADP (100  $\mu$ M total of nucleotide). Enzyme titrations were performed, and enzyme concentrations were chosen within the EC<sub>50</sub>-EC<sub>80</sub> range for fluorescence intensity. Kinase reactions were prepared in triplicate in 384 well low volume black round bottom polystyrene NBS microplates (Corning #5414). 10  $\mu$ L kinase reactions were prepared by combining PI3K with 1  $\mu$ L alpelisib for 30 minutes at room temperature then adding ATP and diC8-PIP<sub>2</sub> (Avanti) in kinase buffer at 30 °C for 1 hour. Final concentrations of reagents were 0-10  $\mu$ M alpelisib, 100  $\mu$ M ATP, 50  $\mu$ M diC8-PIP<sub>2</sub>, and in the kinase buffer, 50 mM HEPES (pH 7.5), 4 mM MgCl<sub>2</sub>, 1% DMSO, and 0.01% Brij-35. Reactions were quenched by adding 10  $\mu$ L of a mixture containing ADP<sup>2</sup> antibody mixture and Alexa Fluor 594 Tracer. Detection of ADP fluorescence intensity was measured with a Phera Star plate reader (BMG Labtech) at excitation 584 nM, emission 620 nM, and gain adjustment of 2500. IC<sub>50</sub> values were calculated using a log curve fitting to a non-linear regression model. Data were analyzed by the GraphPad Prism software.

### **Cell viability assays.**

1000 MCF10A cells were seeded in 100  $\mu$ L of MCF10A media (containing 2% horse serum) lacking EGF or insulin, per well, in a 96-well plate. 24 hours later, serial concentrations of alpelisib or GDC-0077 were added in 100  $\mu$ L of MCF10A media (containing 2% horse serum) lacking EGF or insulin. Cells were incubated for 4 days and then developed with CellTiter-Glo (Promega). Fraction of cell viability was calculated relative to cell growth condition without drug.

### **Analysis of patient response to endocrine therapy**

Retrospective PFS analysis was performed on tumors from a large breast cancer dataset (n=1918) sequenced by MSK-IMPACT (9). Tumors were included in analysis if both pre- and post-endocrine therapy (aromatase inhibitor or fulvestrant) biopsies confirmed WT, single *PIK3CA* mutation, or multiple *PIK3CA* mutations. Kaplan-Meier curves were generated for PFS after firstline aromatase inhibitor or firstline fulvestrant therapy. p values were calculated using the log-rank test.

### **Analysis of patient response to PI3K inhibitor therapy**

PFS analysis was performed on patients enrolled in NCT01870505, a phase 1 clinical trial (n=51) of alpelisib plus letrozole or exemestane for patients with hormone-receptor positive locally-advanced unresectable or metastatic breast cancer. Patients separately provided written informed consent to MSKCC IRB #12-245 (NCT01775072) for tumor sequencing. Five patients had indeterminate *PIK3CA* mutational status by NGS and were excluded from analysis. Cases were analyzed for *PIK3CA* mutational status: WT (n=6), single mutant (n=31), and multiple mutant (n=9). Progression free-survival was defined as time interval between enrollment in the clinical trial to disease progression or death (whichever was first). Survival analysis was performed using Kaplan-Meier methods and Statistical significance was determined by log-rank. We rejected the null hypotheses with a two-sided  $\alpha = 0.05$ .

For analysis of the SANDPIPER clinical trial (12) patient ctDNA samples (n=631), 508 patient samples met quality control parameters and were analyzed by Foundation Medicine Foundation One Liquid test (70) which sequences half the exons of *PIK3CA* and can detect mutations at amino



acid positions 545, 1047, 453, 726, and 1043 (Fig. S10). 339 samples were identified with *PIK3CA* mutations, of which 66 contained two or more *PIK3CA* mutations. Patients with measurable disease from the ctDNA *PIK3CA* mutant cohort, on the taselisib arm, were analyzed based on the percentage change in the sum of longest diameter (SLD) of target lesion from baseline and were tabulated by waterfall plot. Patients with both measurable and nonmeasurable disease from the ctDNA *PIK3CA* mutant cohort were assessed on the placebo and taselisib arms for objective response rate (ORR) defined by RECIST v1.1 criteria (50). 95% CI for rates were constructed using the Blyth-Still-Casella method. The CI for the difference in ORRs between the two treatment arms were determined using the normal approximation to the binomial distribution. Response rates in the treatment arms were compared (p-value) using the stratified Cochran-Mantel-Haenszel test.

### **Statistical analysis**

All statistical analyses are shown in the appropriate method and figure legend. Investigators were unblinded when assessing the outcome of the *in vivo* experiments. All cellular and biochemical experiments were repeated at least three times unless otherwise indicated.

## Supplementary Text

### Postulated biochemical mechanisms of *PIK3CA* mutations

E545K and E453Q are located in the binding interfaces between p110 $\alpha$  and p85 $\alpha$  (38, 39) and are predicted to be disrupters. E545K, located in the helical domain, disrupts binding to the p85 $\alpha$  nSH2 domain and has a similar biochemical effect as phosphotyrosine peptide binding to p85 $\alpha$  (Fig. 3A and B), and E453Q impairs p110 $\alpha$  C2 domain binding to the p85 $\alpha$  iSH2 domain (Fig. 3A and B). The orientations of p110 $\alpha$  C2 to p85 $\alpha$  iSH2 are similar in the WT, WT + PIP<sub>2</sub>, and H1047R structures, with root mean square deviation (RMSD) values < 1 Å (Fig. S7A); however, there are subtle changes in the C2 loop regions interacting with p85 $\alpha$  iSH2 including the orientation of E453 which may be functionally relevant (Fig. S7A, S7B) (35, 38, 39). H1047R and M1043L are located along the C-terminal tail (38), which forms part of the membrane-docking surface and are therefore predicted to be binders (Fig. 3A and B). Structurally, H1047R is postulated to increase membrane binding through interactions of the mutated arginine as well as reorganization of a C-terminal loop that also interacts with membrane (38). E726K is in the kinase domain and has been reported to be activating (29), but its mechanism is unknown. In crystal structures (35, 38, 39), E726 is located in the membrane binding interface (Fig. S7C) and is oriented outwards, directed towards the membrane (Fig. S7D). Therefore, we hypothesized that E726K is also a binder, as the mutant lysine would increase positive charge and promote binding to the negatively charged phospholipids at the plasma membrane (Fig. 2B, S7D).

### Rationale for recombinant protein purification strategy

Recombinant full-length human PI3K $\alpha$  complexes were purified from suspension EXPI293 human embryonic kidney cells (Fig. S8A). Fusing affinity tags to the termini of *PIK3CA* alters its basal

catalytic activity (67). Structurally, the N-terminus sits along its binding interface with p85 $\alpha$  and the C-terminus is located near its catalytic site. To generate recombinant p110 $\alpha$  in its most native form, we developed a purification scheme that utilizes a polyhistidine tag on the N-terminus p85 $\alpha$  to purify untagged p110 $\alpha$ , as a heterodimeric complex.

**A**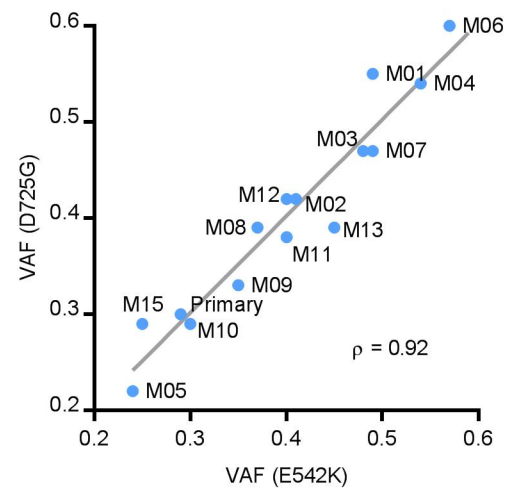

Primary (breast)  
 M01 (ovary, left mass)  
 M02 (periaortic)  
 M03 (liver, posterior)  
 M04 (lung, left lower lobe)  
 M05 (bone, thoracic spine)  
 M06 (lung, right upper lobe)  
 M07 (liver dome)  
 M08 (uterus)  
 M09 (lung, left upper lobe)  
 M10 (lymph node, carina)  
 M11 (lung, right lower lobe)  
 M12 (liver, left lower lobe)  
 M13 (liver, left lobe)  
 M15 (periadrenal, left)

**B**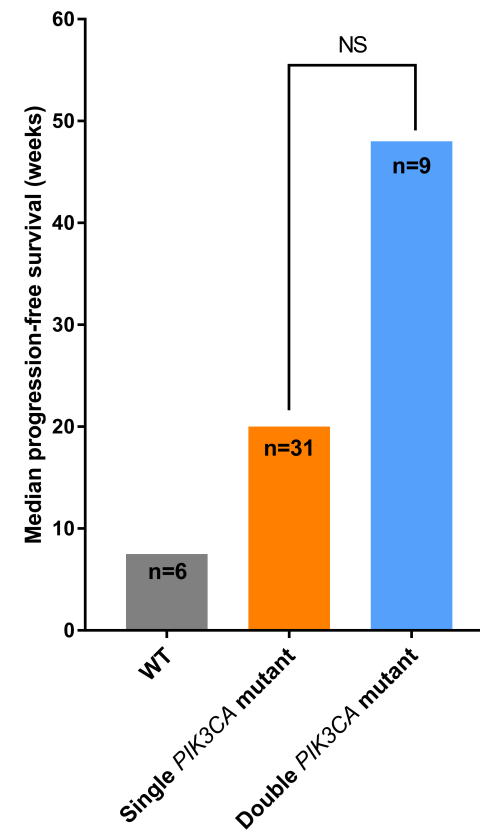**C**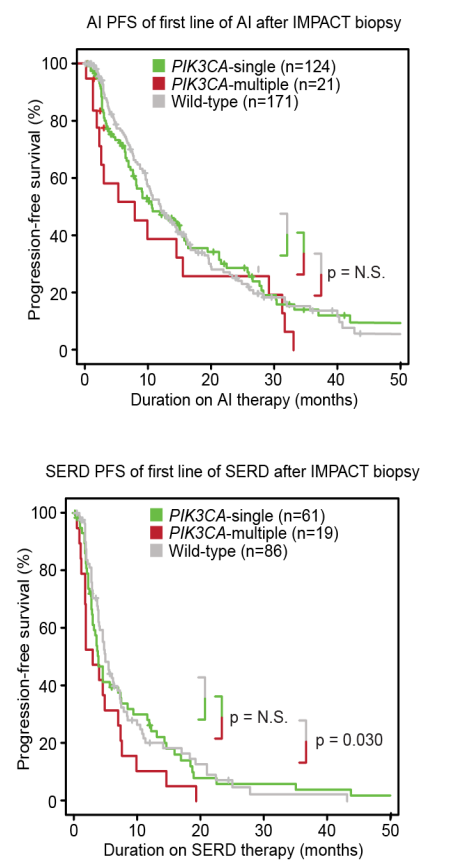**Fig. S1**

**Fig. S1: Signals of improved clinical response to PI3K inhibition in some breast cancer patients with double *PIK3CA* mutations.** (A) Variant allele frequencies of the primary tumor and 14 metastases of an exceptional responder patient to alpelisib monotherapy (18). The plot was fitted to a 1:1 distribution, with  $\rho$  correlation coefficient indicated. (B) Bar graphs of progression free survival of ER+ metastatic breast cancer patients with WT, single, and double *PIK3CA* mutant tumors on a phase 1 clinical trial (NCT01870505) of alpelisib and an aromatase inhibitor (7.5 weeks [95% CI 5 weeks – not reached] vs 20 weeks [95% CI 10 weeks – not reached] vs 48 weeks [95% CI 13 weeks – 49 weeks]). NS = not significant. (C) Retrospective analysis of PFS of patients with double *PIK3CA* mutant, single *PIK3CA* mutant, and WT *PIK3CA* breast cancers on aromatase inhibitor (top) or fulvestrant (bottom) therapy from the MSKCC cohort (9). p values were calculated using the logrank test.

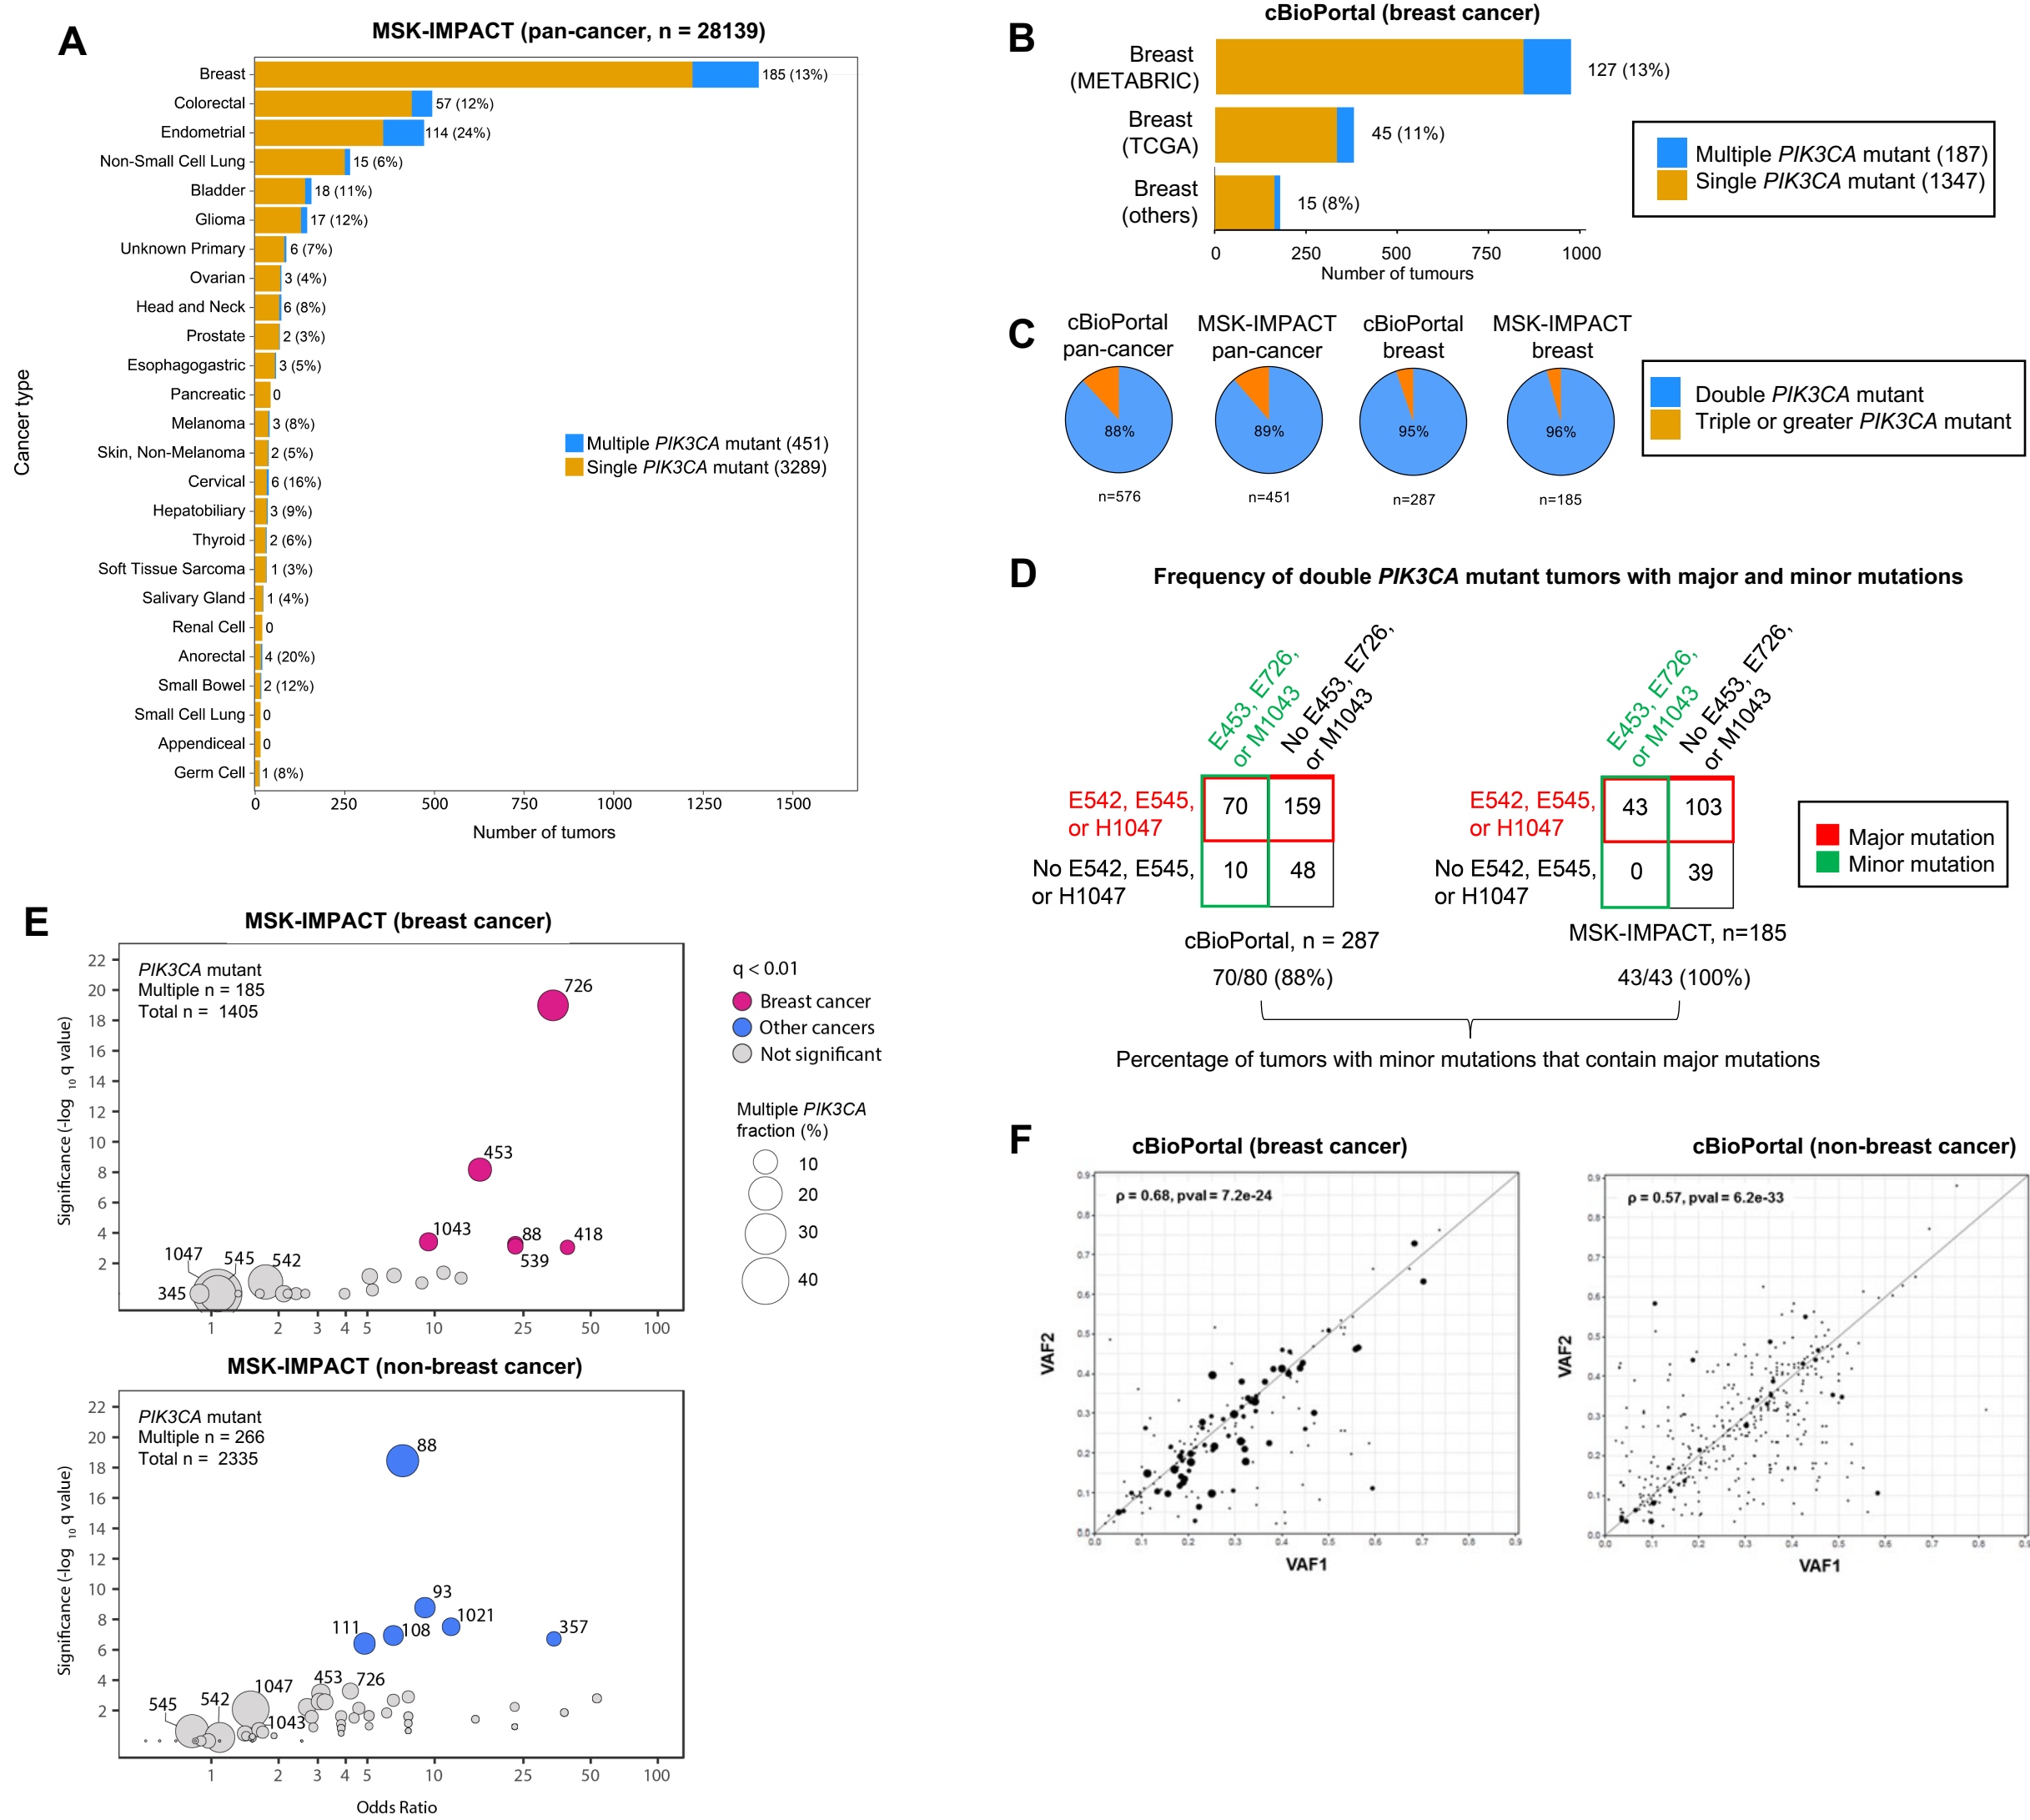

Fig. S2

**Fig. S2: Double *PIK3CA* mutations are frequent across all cancers including breast cancer.**

(A, B) Bar plot showing number and frequency of multiple *PIK3CA* mutant tumors among all *PIK3CA* mutant tumors across different histologies (MSK-IMPACT) (A) and among *PIK3CA* mutant breast tumors (cBioPortal) (B). (C) Pie charts showing frequency of double *PIK3CA* mutated tumors among multiple *PIK3CA* mutated tumors across datasets. (D) 2 x 2 tables showing frequency of double *PIK3CA* mutant breast tumors from cBioPortal and MSK-IMPACT with major mutations E542, E545, or H1047 (boxed in red) and with minor mutations E453, E726, or M1043. Tumors containing major and minor mutations are boxed in red and green, respectively. (E) Codon enrichment analysis of amino acid positions most recurrently found in multiple *PIK3CA* mutated breast tumors (top) and non-breast tumors (bottom) as compared to single *PIK3CA* mutant tumors (MSK-IMPACT). Samples containing the same double mutant are depicted as a circle, sized according to the number of samples. Samples colored in pink or blue are those with an FDR corrected pvalue ( $qval$ )  $< 0.01$ . Statistics were calculated independently using two-sided Fisher's exact tests. (F) Variant allele frequencies in double *PIK3CA* mutant breast (left) and non-breast (right) tumors (cBioPortal). Plots were fitted to a 1:1 distribution, with  $\rho$  correlation coefficient and p-value indicated.

METABRIC 2019

MSKCC cohort

| <i>PIK3CA</i> mutational status                | Multiple      | Single        | p      | <i>PIK3CA</i> mutational status      | Multiple      | Single        | p     |
|------------------------------------------------|---------------|---------------|--------|--------------------------------------|---------------|---------------|-------|
| n                                              | 114           | 681           |        | n                                    | 99            | 626           |       |
| <b>Age at diagnosis = mean (SD)</b>            | 62.50 (12.76) | 62.31 (12.22) | 0.881  | <b>Age at diagnosis = mean (SD)</b>  | 53.27 (11.51) | 53.58 (11.98) | 0.811 |
| <b>Inferred menopausal state = pre (%)</b>     | 21 (18.4)     | 121 (17.8)    | 0.971  | <b>Menopausal state (%)</b>          |               |               | 0.769 |
|                                                |               |               |        | Pre/perimenopausal                   | 52 (52.5)     | 304 (48.6)    |       |
|                                                |               |               |        | Postmenopausal                       | 47 (47.5)     | 317 (50.6)    |       |
|                                                |               |               |        | Male or Unknown                      | 0 (0.0)       | 5 (0.8)       |       |
| <b>Stage (%)</b>                               |               |               | 0.071  | <b>Stage (%)</b>                     |               |               | 0.341 |
| 1                                              | 35 (39.3)     | 164 (32.9)    |        | 1                                    | 27 (27.3)     | 200 (31.9)    |       |
| 2                                              | 51 (57.3)     | 290 (58.1)    |        | 2                                    | 26 (26.3)     | 191 (30.5)    |       |
| 3                                              | 2 (2.2)       | 43 (8.6)      |        | 3                                    | 25 (25.3)     | 108 (17.3)    |       |
| 4                                              | 1 (1.1)       | 2 (0.4)       |        | 4                                    | 21 (21.2)     | 122 (19.5)    |       |
|                                                |               |               |        | Undefined                            | 0 (0.0)       | 5 (0.8)       |       |
| <b>Lymph nodes (%)</b>                         |               |               | 0.194  |                                      |               |               |       |
| 1-3                                            | 33 (28.9)     | 210 (30.8)    |        |                                      |               |               |       |
| 4+                                             | 12 (10.5)     | 111 (16.3)    |        |                                      |               |               |       |
| None                                           | 69 (60.5)     | 360 (52.9)    |        |                                      |               |               |       |
| <b>Grade (%)</b>                               |               |               | 0.165  | <b>Grade (%)</b>                     |               |               | 0.131 |
| 1                                              | 16 (14.4)     | 98 (15.0)     |        | 1                                    | 7 (7.1)       | 45 (7.2)      |       |
| 2                                              | 59 (53.2)     | 287 (43.8)    |        | 2                                    | 37 (37.4)     | 171 (27.3)    |       |
| 3                                              | 36 (32.4)     | 270 (41.2)    |        | 3                                    | 43 (43.4)     | 346 (55.3)    |       |
|                                                |               |               |        | Unknown                              | 12 (12.1)     | 64 (10.2)     |       |
| <b>Receptor status (%)</b>                     |               |               | 0.001  | <b>Receptor status (%)</b>           |               |               | 0.041 |
| HR+/HER2-                                      | 109 (95.6)    | 568 (83.4)    |        | HR+/HER2-                            | 93 (93.9)     | 521 (83.2)    |       |
| HR+/HER2+                                      | 1 (0.9)       | 35 (5.1)      |        | HR+/HER2+                            | 3 (3.0)       | 66 (10.5)     |       |
| HR-/HER2+                                      | 0 (0.0)       | 42 (6.2)      |        | HR-/HER2+                            | 1 (1.0)       | 18 (2.9)      |       |
| HR-/HER2-                                      | 4 (3.5)       | 36 (5.3)      |        | HR-/HER2-                            | 2 (2.0)       | 21 (3.4)      |       |
| <b>ER expression = + (%)</b>                   | 106 (93.0)    | 583 (85.6)    | 0.046  | <b>ER status (%)</b>                 |               |               | 0.621 |
|                                                |               |               |        | Positive                             | 88 (88.9)     | 533 (85.1)    |       |
|                                                |               |               |        | Negative                             | 8 (8.1)       | 73 (11.7)     |       |
|                                                |               |               |        | Unknown/not defined                  | 3 (3.0)       | 20 (3.2)      |       |
| <b>PR expression = + (%)</b>                   | 79 (69.3)     | 443 (65.1)    | 0.437  | <b>PR status (%)</b>                 |               |               | 0.907 |
|                                                |               |               |        | Positive                             | 63 (63.6)     | 406 (64.9)    |       |
|                                                |               |               |        | Negative                             | 31 (31.3)     | 193 (30.8)    |       |
|                                                |               |               |        | Unknown/not defined                  | 5 (5.1)       | 27 (4.3)      |       |
| <b>HER2 expression = + (%)</b>                 | 1 (0.9)       | 77 (11.3)     | <0.001 | <b>HER2 status (%)</b>               |               |               | 0.003 |
|                                                |               |               |        | Positive                             | 1 (1.0)       | 64 (10.2)     |       |
|                                                |               |               |        | Negative                             | 93 (93.9)     | 533 (85.1)    |       |
|                                                |               |               |        | Unknown/not defined                  | 5 (5.1)       | 29 (4.6)      |       |
| <b>Histology (%)</b>                           |               |               | 0.078  | <b>Histology (%)</b>                 |               |               | 0.132 |
| IDC                                            | 87 (76.3)     | 583 (85.7)    |        | IDC                                  | 63 (63.6)     | 442 (70.6)    |       |
| ILC                                            | 16 (14.0)     | 53 (7.8)      |        | ILC                                  | 28 (28.3)     | 125 (20.0)    |       |
| Mixed IDC/ILC                                  | 9 (7.9)       | 36 (5.3)      |        | Mixed IDC/ILC                        | 7 (7.1)       | 35 (5.6)      |       |
| Other                                          | 2 (1.8)       | 8 (1.2)       |        | Other                                | 1 (1.0)       | 24 (3.8)      |       |
| <b>Received (neo)adjuvant chemotherapy (%)</b> | 14 (12.3)     | 105 (15.4)    | 0.467  | <b>Received chemotherapy (%)</b>     | 47 (47.5)     | 305 (48.7)    | 0.902 |
| <b>Received adjuvant hormonal therapy (%)</b>  | 71 (62.3)     | 432 (63.4)    | 0.895  | <b>Received hormonal therapy (%)</b> | 30 (30.3)     | 250 (39.9)    | 0.086 |
| <b>Received adjuvant radiotherapy (%)</b>      | 62 (54.4)     | 375 (55.1)    | 0.973  |                                      |               |               |       |
| <b>PAM50 subtype (%)</b>                       |               |               | 0.155  |                                      |               |               |       |
| Basal                                          | 3 (2.7)       | 45 (6.6)      |        |                                      |               |               |       |
| HER2                                           | 10 (8.8)      | 86 (12.7)     |        |                                      |               |               |       |
| Luminal A                                      | 62 (54.9)     | 334 (49.2)    |        |                                      |               |               |       |
| Luminal B                                      | 21 (18.6)     | 145 (21.4)    |        |                                      |               |               |       |
| Normal                                         | 17 (15.0)     | 69 (10.2)     |        |                                      |               |               |       |
| <b>Nottingham Prognostic Index (mean (SD))</b> | 3.69 (0.99)   | 3.87 (1.17)   | 0.116  |                                      |               |               |       |

Fig. S3



**Fig. S3: Clinicogenomic analysis of *PIK3CA* mutant breast cancers.** METABRIC 2019 (64) and MSKCC cohorts (9) were analyzed. p values were calculated by t-test (age) and chi square or Fisher's exact test, when appropriate.

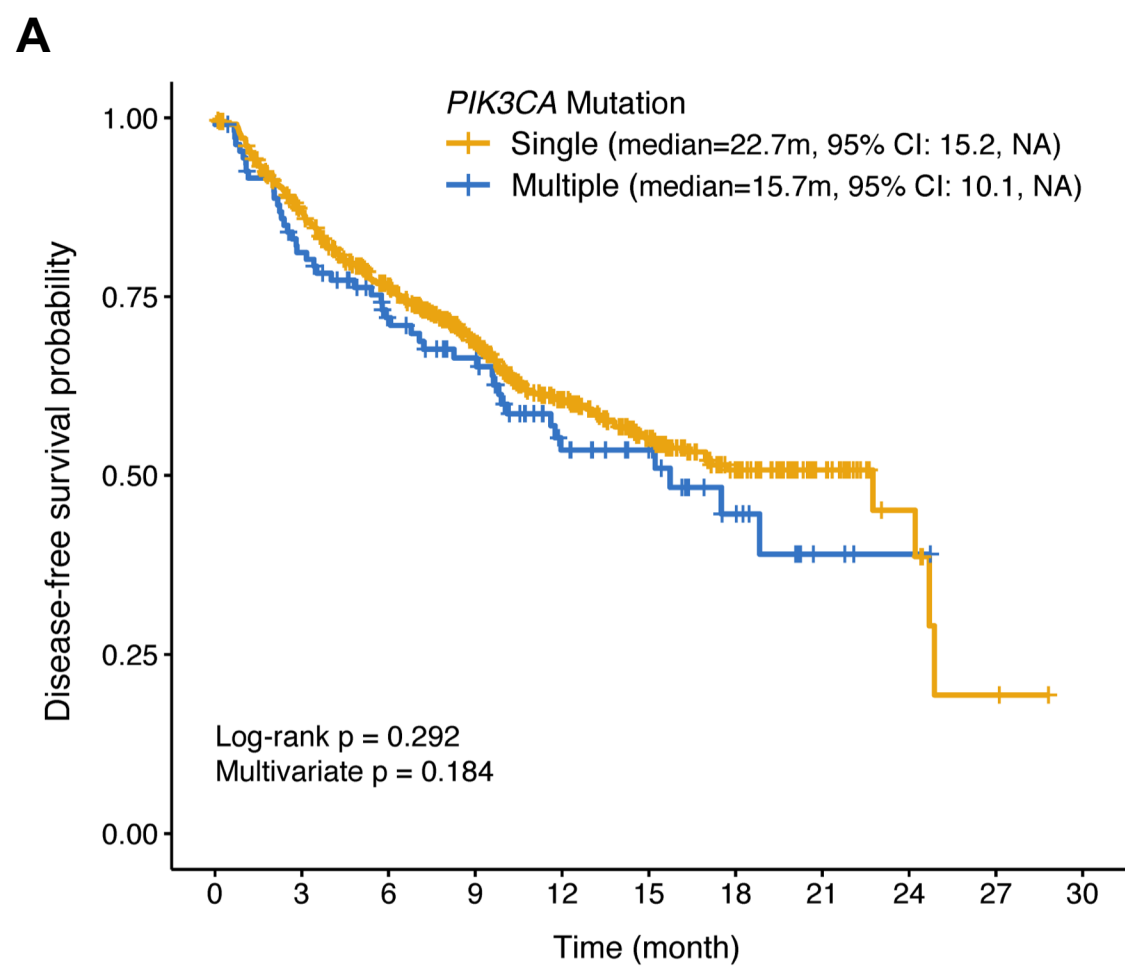

|          |     |     |     |     |     |     |    |    |   |   |   |
|----------|-----|-----|-----|-----|-----|-----|----|----|---|---|---|
| Single   | 565 | 468 | 374 | 278 | 197 | 130 | 70 | 29 | 7 | 2 | 0 |
| Multiple | 108 | 85  | 66  | 55  | 31  | 22  | 11 | 3  | 1 | 0 | 0 |

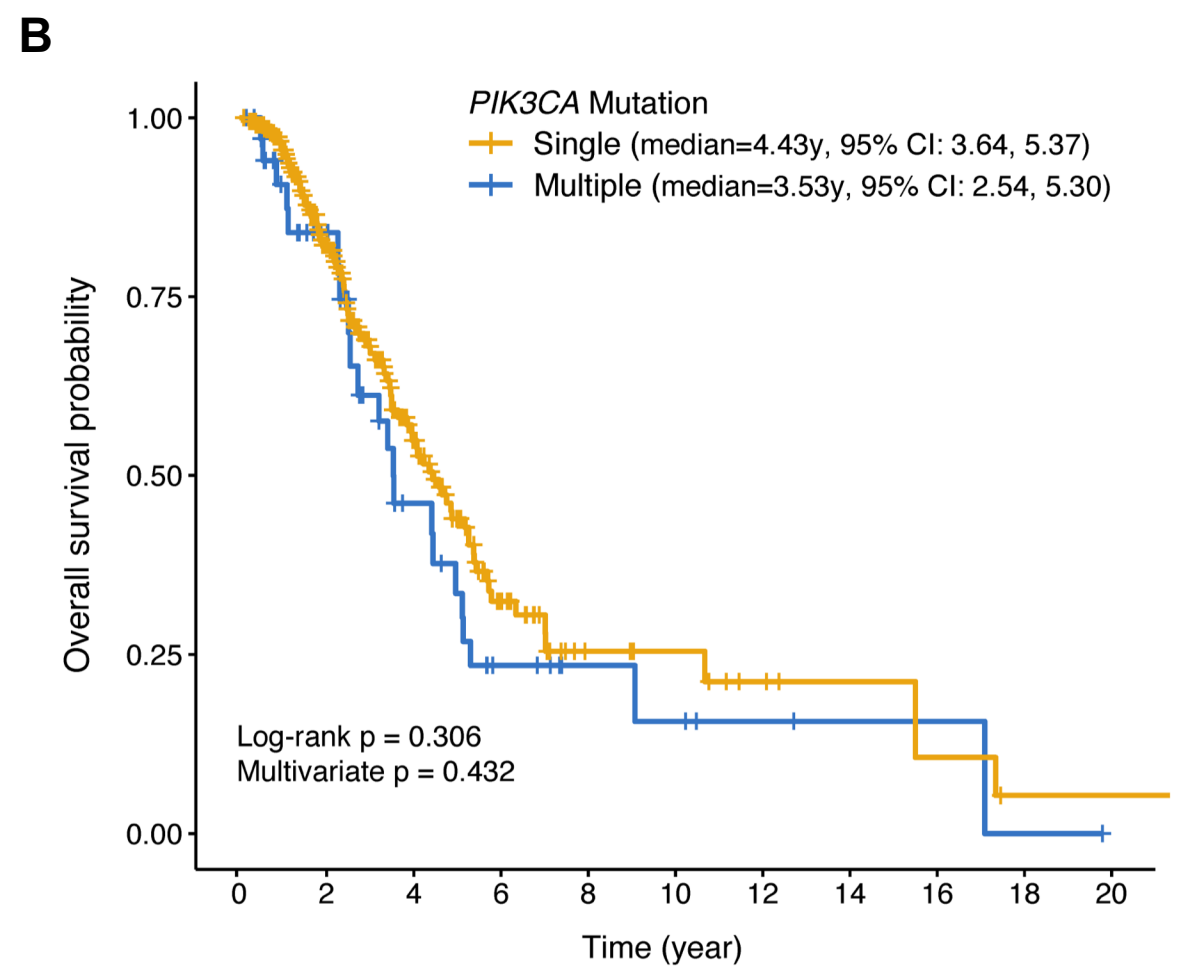

|          |     |     |    |    |   |   |   |   |   |   |   |
|----------|-----|-----|----|----|---|---|---|---|---|---|---|
| Single   | 186 | 114 | 50 | 19 | 5 | 6 | 3 | 2 | 2 | 1 | 1 |
| Multiple | 33  | 20  | 11 | 7  | 3 | 2 | 1 | 1 | 1 | 1 | 0 |

Fig. S4

**Fig. S4: Survival analysis of *PIK3CA* mutant HR+/HER2- breast cancer patients.** (A) Invasive disease-free survival analysis of METABRIC 2019 cohort (64). (B) Overall survival analysis of MSKCC cohort (9). For multivariate analyses, Cox proportional hazard models were utilized and adjusted for age, menopausal status, histology, stage at diagnosis, and receipt of chemotherapy, hormonal therapy, and radiotherapy. For the overall survival analysis, all models were further adjusted for the late entry by left truncation. For univariate analysis, p values were calculated using the log-rank test. For multivariate analysis, p values were calculated using the Cox proportional hazard model.

**A**

FFPE archival tumor sample

Fresh tumor sample

| Double <i>PIK3CA</i> mutants | gDNA distance | Resolvable by NGS | cDNA distance | Resolvable by NGS | Resolvable by Sanger-seq | Resolvable by SMRT-seq |
|------------------------------|---------------|-------------------|---------------|-------------------|--------------------------|------------------------|
| E542K + E453Q/K              | 8.00 kb       | No                | 0.27 kb       | Yes               | Yes                      | Yes                    |
| E542K + E726K                | 2.85 kb       | No                | 0.56 kb       | No                | Yes                      | Yes                    |
| E542K + M1043L/I             | 16.00 kb      | No                | 1.51 kb       | No                | No                       | Yes                    |
| E545K + E453Q/K              | 8.01 kb       | No                | 0.28 kb       | Yes               | Yes                      | Yes                    |
| E545K + E726K                | 2.84 kb       | No                | 0.55 kb       | No                | Yes                      | Yes                    |
| E545K + M1043L/I             | 15.98 kb      | No                | 1.50 kb       | No                | No                       | Yes                    |
| H1047R + E453Q/K             | 24.01 kb      | No                | 1.79 kb       | No                | No                       | Yes                    |
| H1047R + E726K               | 13.15 kb      | No                | 0.97 kb       | No                | No                       | Yes                    |

Major mutation  
Minor mutation

**B**

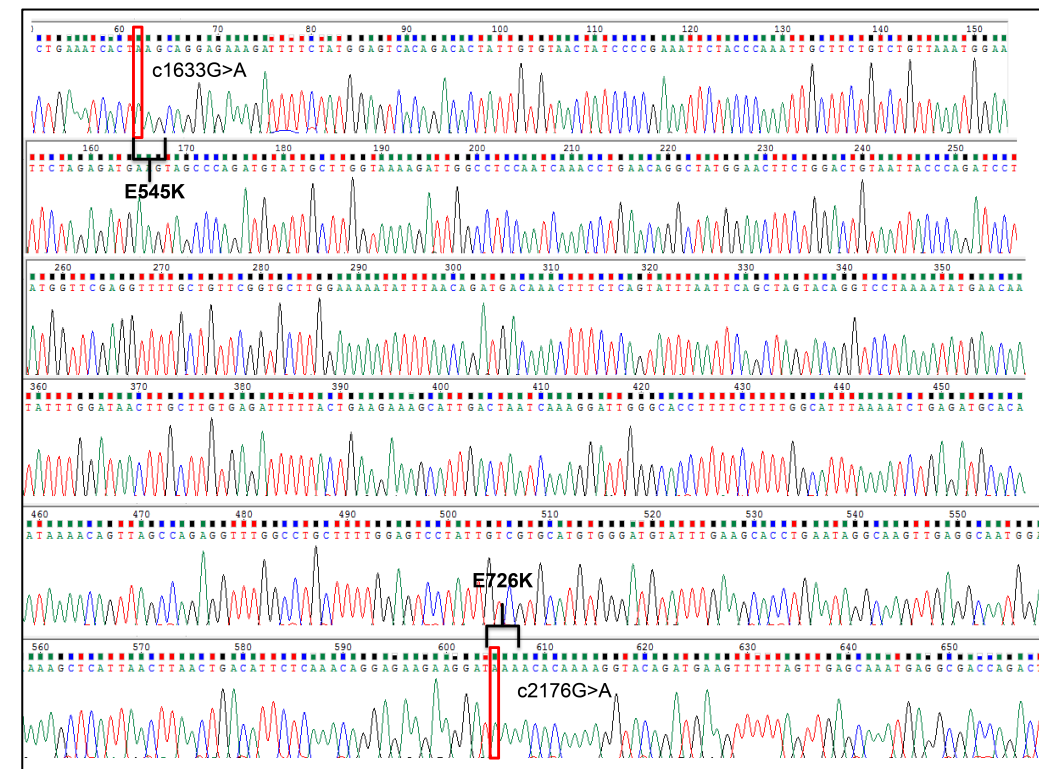

Sanger sequencing of double *PIK3CA* mutant breast tumor cDNA

n=14

E545K/E726K

**C**

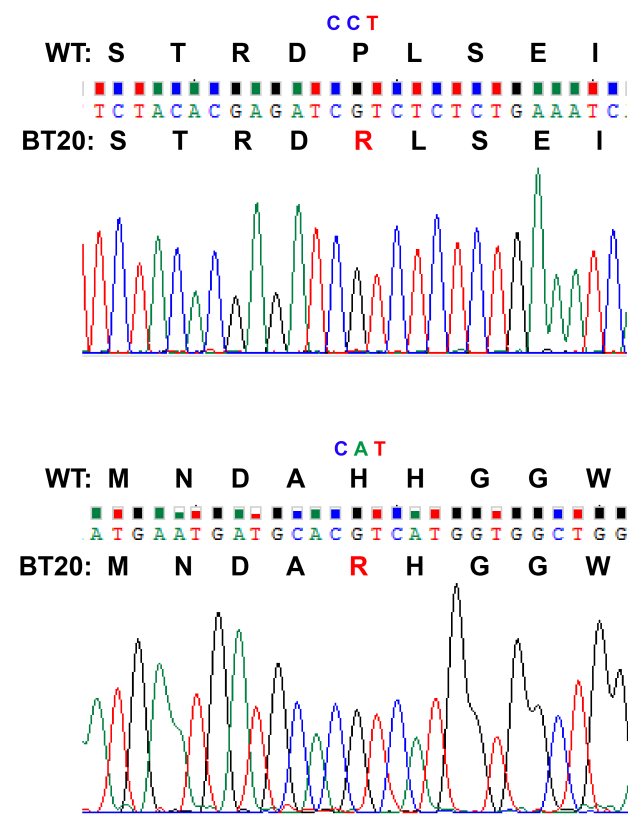

Sanger sequencing of double *PIK3CA* mutant BT20 breast cancer cell line cDNA

n=14

P539/H1047R  
H1047R

**D**

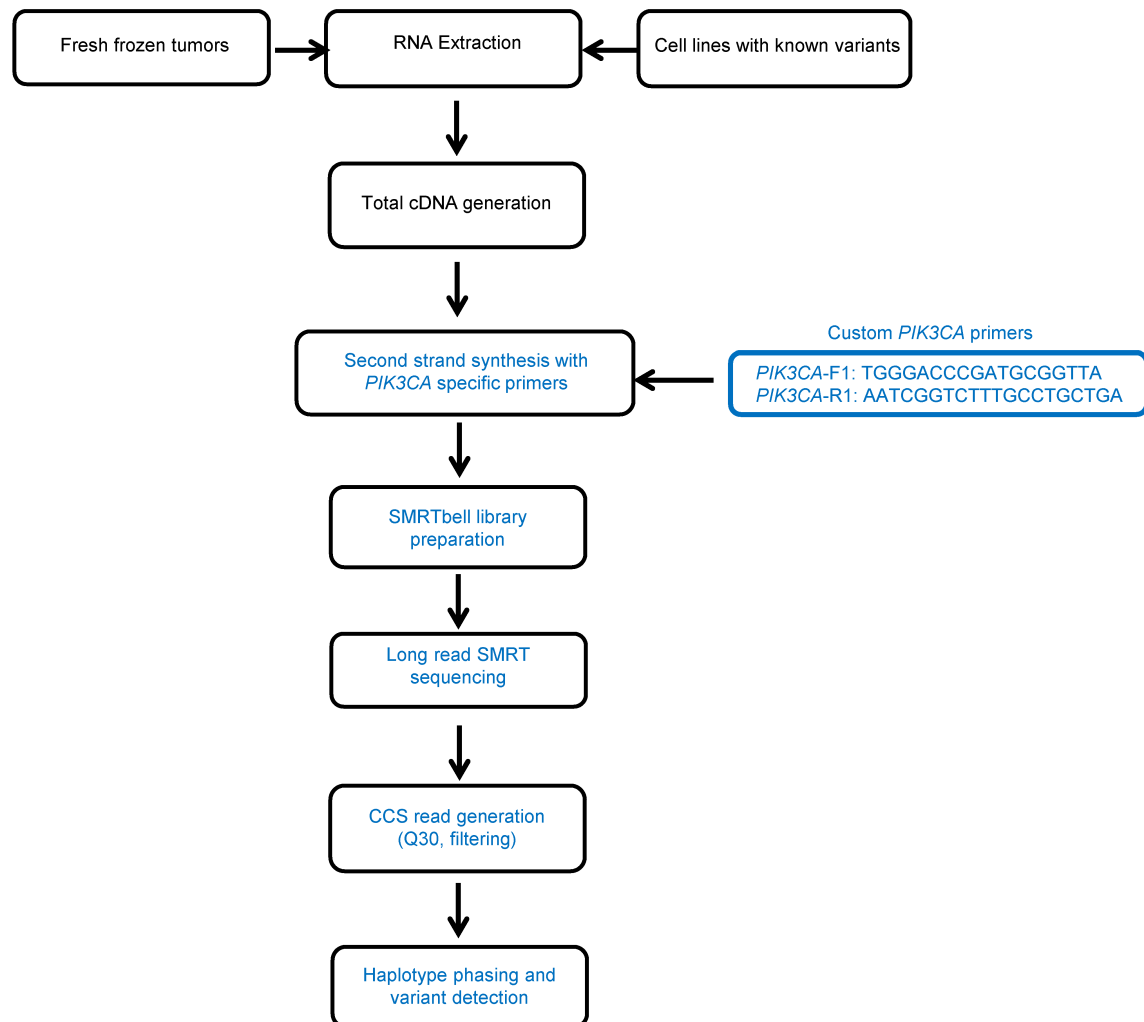

**E**

SMRT-seq of breast cancer cell lines

| Cell Line  | <i>PIK3CA</i> |    |          | Sample Variants |       |    |          | Haplotype % |      |      |     |
|------------|---------------|----|----------|-----------------|-------|----|----------|-------------|------|------|-----|
|            | Codon         | AA | Position | AA              | Codon | %  | Coverage | A           | B    | C    | D   |
| BT20       | CCT           | P  | 539      | R               | CGT   | 29 | 3710     | 66.9        | 21.6 | 6.1  | 5.4 |
|            | CAT           | H  | 1047     | R               | CGT   | 32 | 7573     |             |      |      |     |
|            |               |    |          |                 |       |    |          |             |      |      |     |
| CAL148     | GAC           | D  | 350      | N               | AAC   | 47 | 1788     | 43.8        | 43.8 | 7    | 5.4 |
|            | CAT           | H  | 1047     | R               | CGT   | 52 | 4704     |             |      |      |     |
|            |               |    |          |                 |       |    |          |             |      |      |     |
| MDA-MB-361 | GAG           | E  | 545      | K               | AAG   | 30 | 3774     | 40.6        | 30.5 | 28.9 |     |
|            | AAA           | K  | 567      | R               | AGA   | 28 | 3308     |             |      |      |     |
|            |               |    |          |                 |       |    |          |             |      |      |     |
| HCC202     | ATA           | I  | 391      | M               | ATG   | 46 | 4063     | 48.4        | 28   | 22.7 | 0.6 |
|            | GAG           | E  | 545      | K               | AAG   | 43 | 3990     |             |      |      |     |
|            | TTG           | L  | 866      | F               | TTC   | 19 | 6436     |             |      |      |     |
|            |               |    |          |                 |       |    |          |             |      |      |     |

Wildtype Mutations in cis Mutations in trans

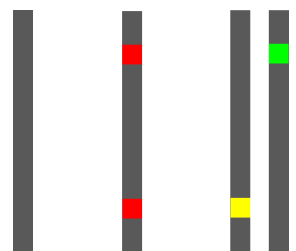

Fig. S5

**Fig. S5: Double *PIK3CA* mutations are in *cis* on the same allele.** (A) Table showing recurrent double *PIK3CA* mutations, distances in genomic DNA (gDNA) and complementary DNA (cDNA), and resolution abilities by different sequencing techniques from FFPE archival and fresh tumors. Double mutants resolvable by SMRT-seq are bolded. (B) Sanger sequencing of cDNA from double *PIK3CA* mutant breast tumor (E545K/E726K) with representative tracing (n=14 colonies). (C) Sanger sequencing of cDNA from double *PIK3CA* mutant breast cancer cell line BT20 (P539/H1047R), with representative tracings from two separate priming reactions from cDNA from the same single colony (n=14 colonies). (D) Workflow for SMRT sequencing from fresh frozen tumors. (E) SMRT-seq phasing of allelic configuration of four double *PIK3CA* mutant breast cancer cell lines (BT20 [P539R/H1047R], CAL148 [D350N/H1047R], MDA-MB-361 [E545K/K567R], HCC202 [E545K/L866F]). *Cis* mutations are shown as red vertical squares, *trans* mutations as single yellow or green squares, and WT sequences as grey vertical squares, as in legend, in order of amplicon frequency.

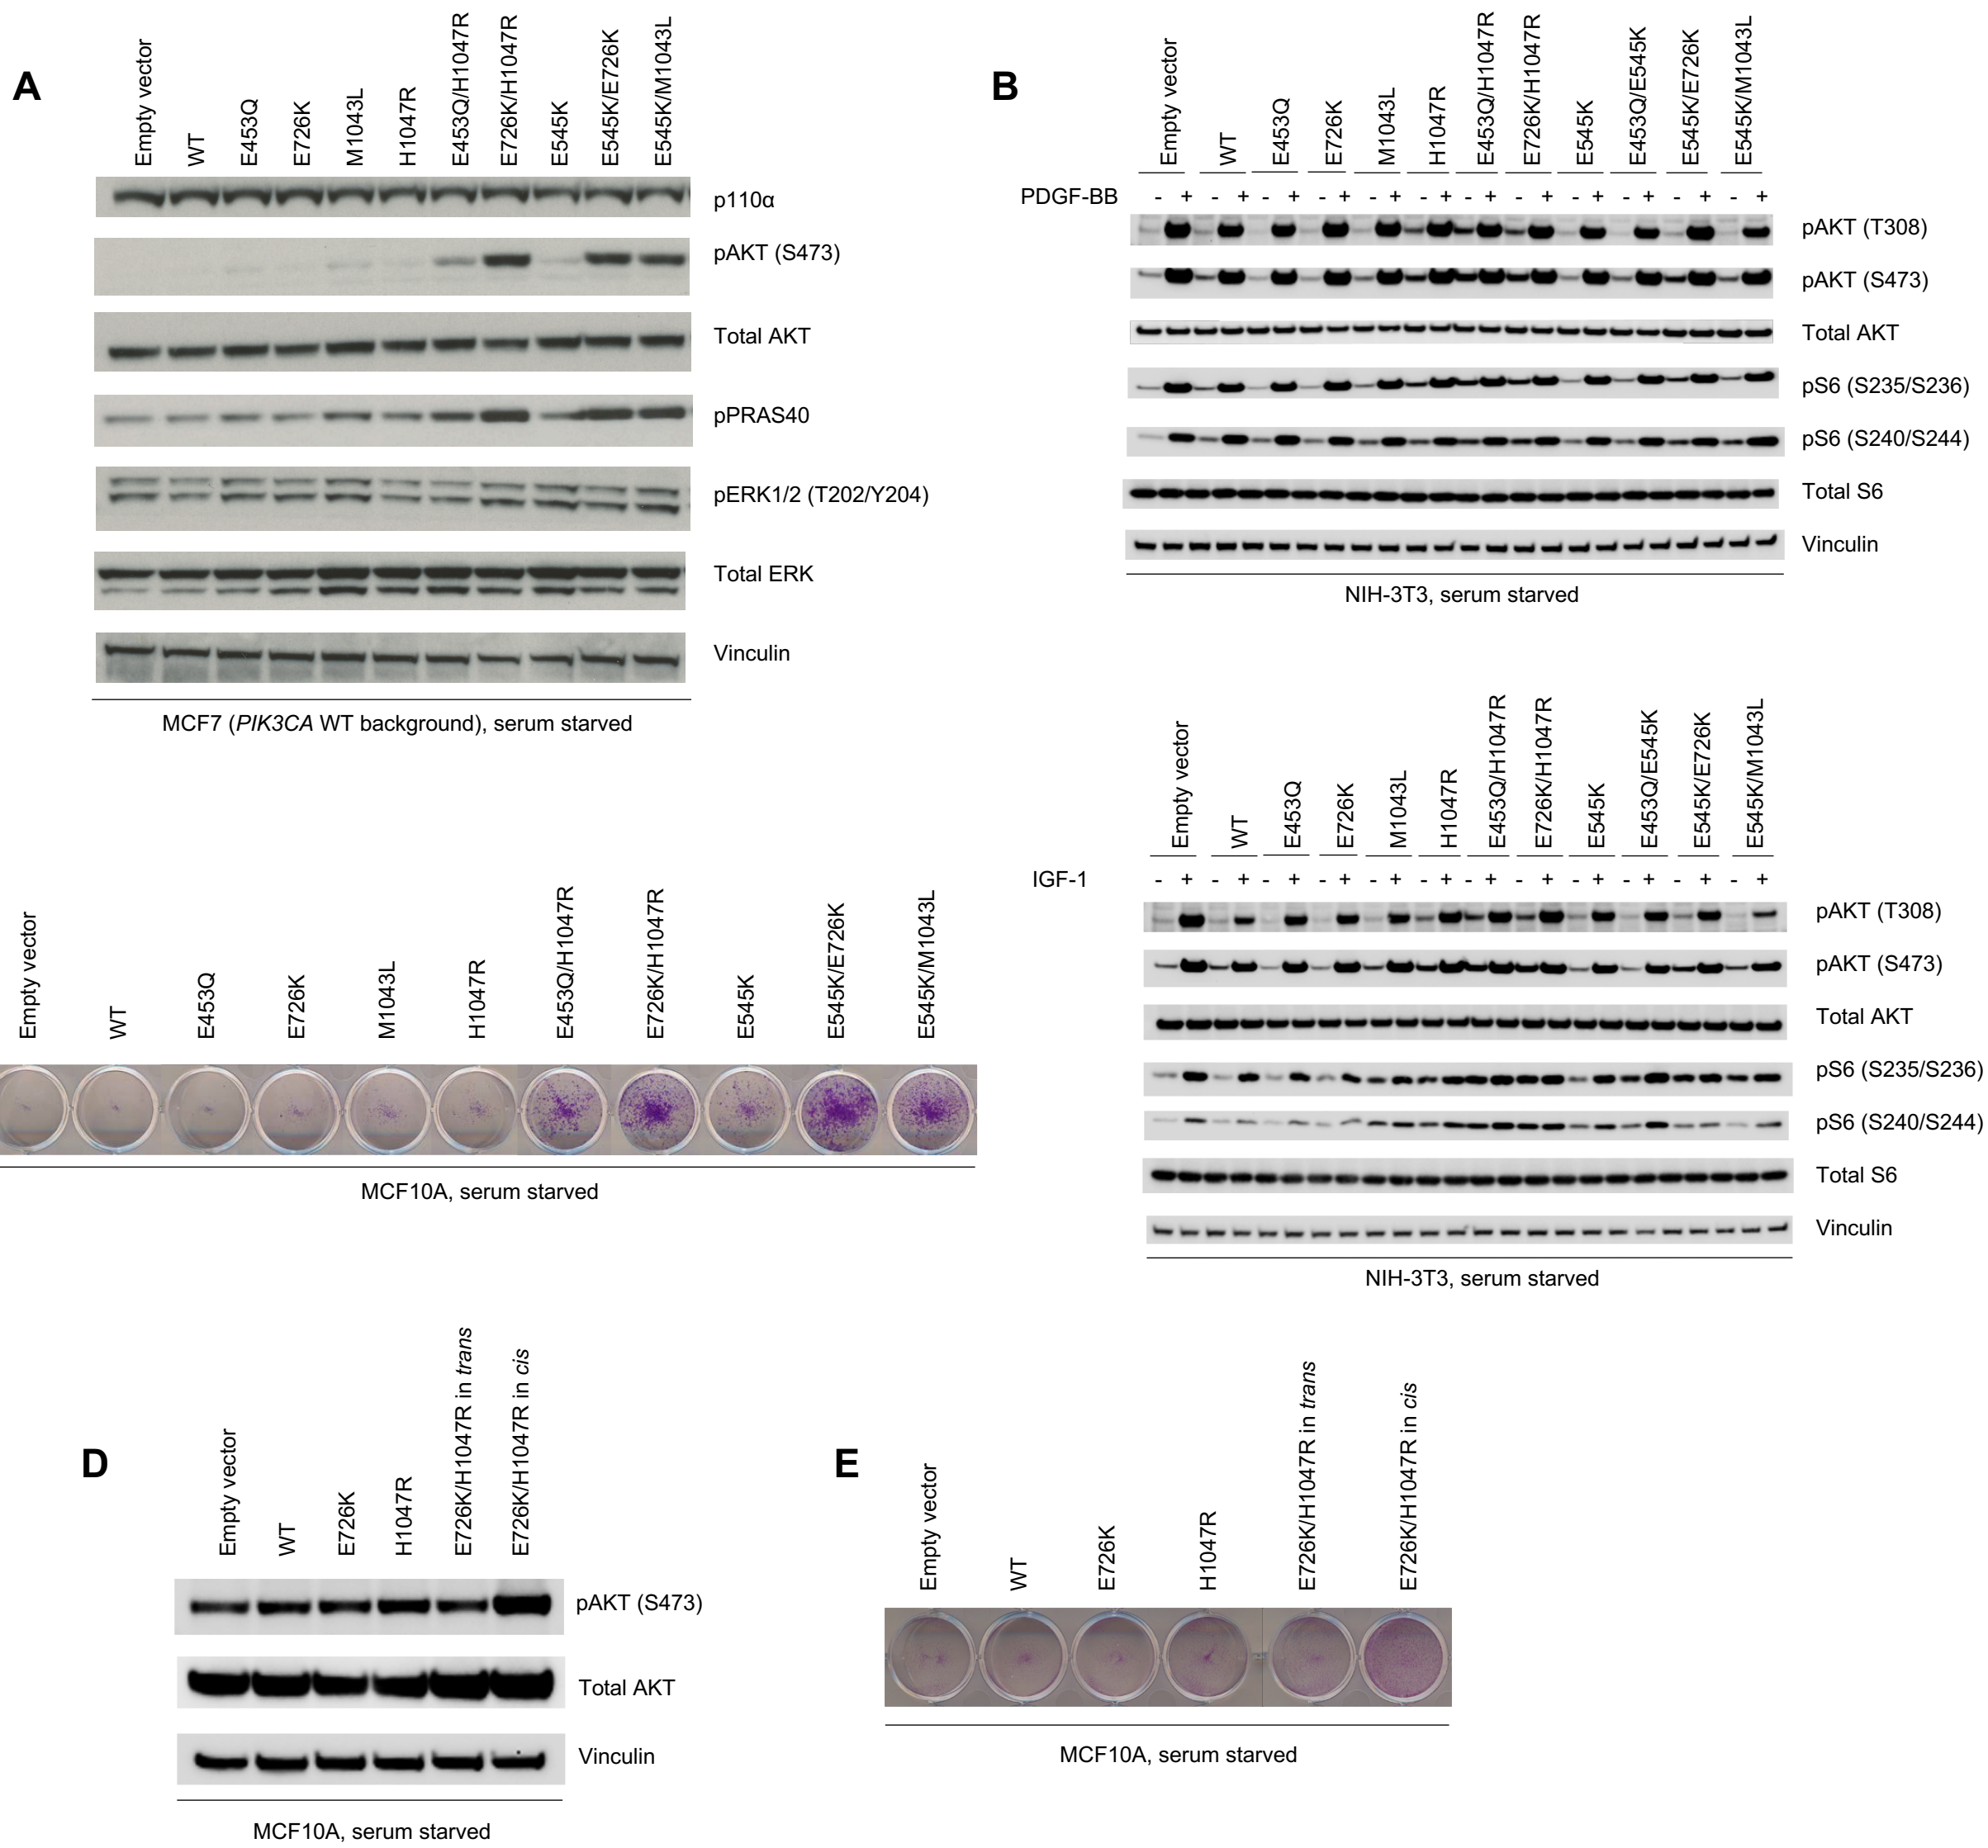

Fig. S6

**Fig. S6: Cellular assays of *PIK3CA* mutations in *cis* and *trans*.** (A) Western blotting of PI3K effectors of *PIK3CA* mutant stably transduced MCF7 cells (in a *PIK3CA* WT background) under serum starvation for 1 day. (B) Western blotting of PI3K effectors of *PIK3CA* mutant stably transduced NIH-3T3 cells, serum starved for 1 day, then stimulated with (top) PDGF-BB (20 ng/mL, 30 minutes) or (bottom) IGF-1 (10 nM, 10 minutes). (C) Crystal violet assay of *PIK3CA* mutant stably transduced MCF10A cells under serum starvation for 4 days (representative sample shown, n=3). (D) Western blotting of PI3K effectors of E726K/H1047R in *cis*, in *trans*, and single *PIK3CA* mutant MCF10A cells serum starved for 1 day. (E) Crystal violet assay of *PIK3CA* mutant MCF10A cells under serum starvation for 4 days (representative sample shown, n=3).



**A**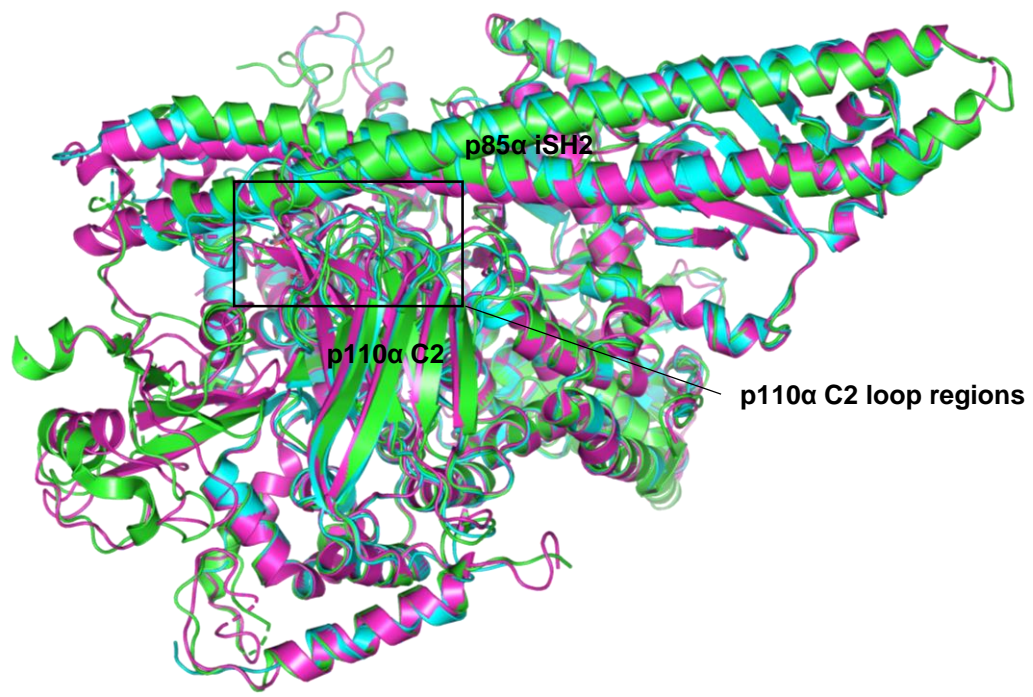

RMSD comparisons

PI3K WT (PDB 2RD0)  
 PI3K WT + PIP<sub>2</sub> (PDB 4OVU)  
 PI3K H1047R (PDB 3HHM)

|           |              |
|-----------|--------------|
| 2RD0:4OVU | RMSD = 0.624 |
| 2RD0:3HHM | RMSD = 0.715 |
| 4OVU:3HHM | RMSD = 0.852 |

**B**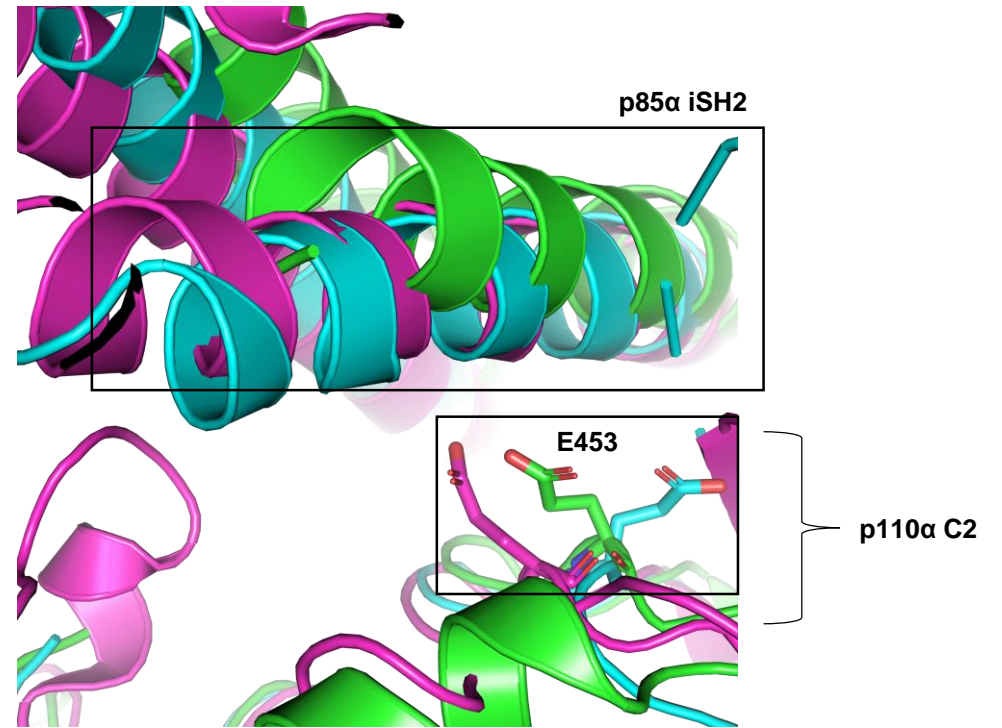**C**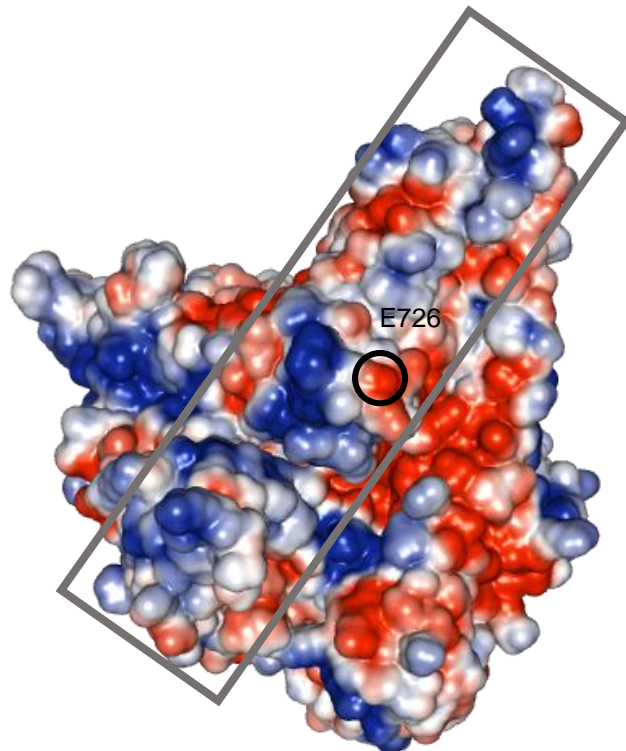

|   |                                            |
|---|--------------------------------------------|
| ■ | Positively charged surfaces                |
| ■ | Negatively charged surfaces                |
| □ | Putative membrane binding surface of PI3Kα |

**D**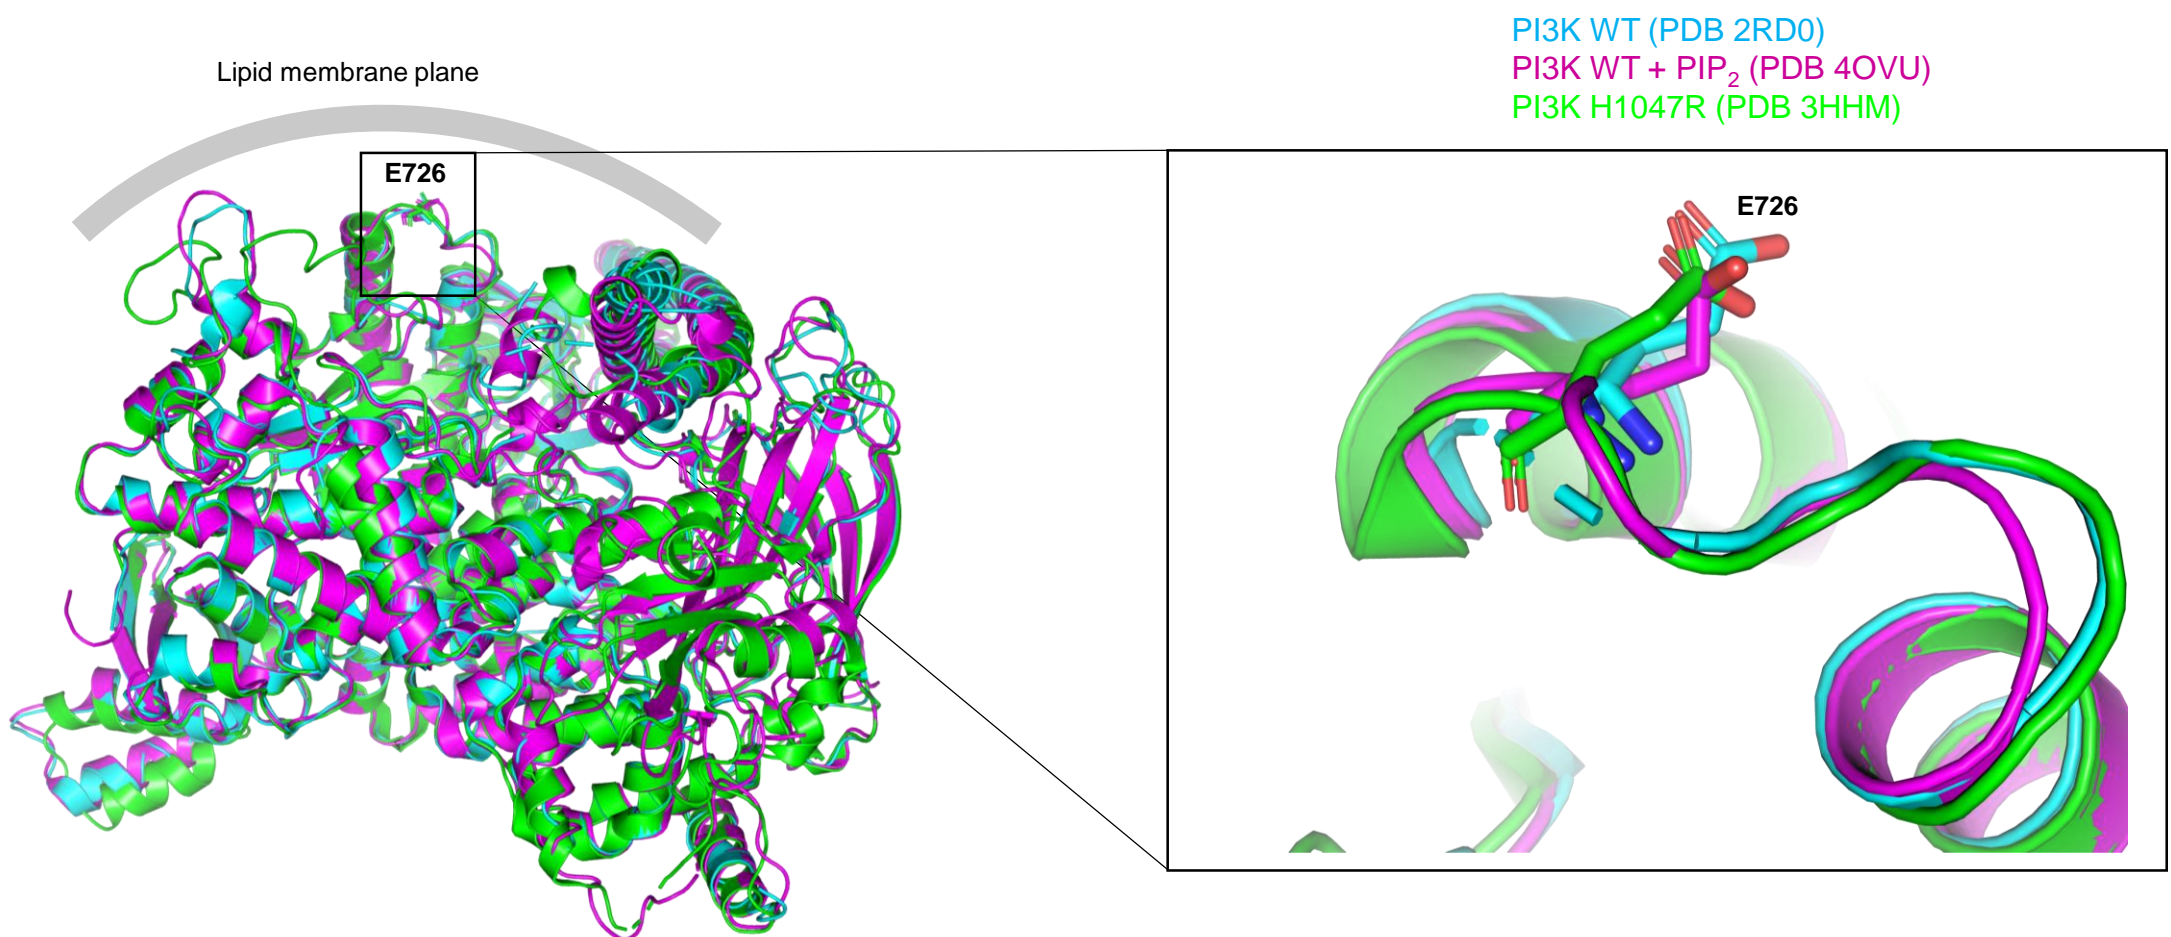

Fig. S7



**Fig. S7: Structural mapping of p110 $\alpha$  E453 and E726 residues in PI3K $\alpha$ .** (A) Structural alignments of PDB 2RD0, 4OVU, and 3HHM PI3K $\alpha$  crystal structures. RMSD comparisons are shown in box. (B) p110 $\alpha$ -C2:p85 $\alpha$ -iSH2 interface is magnified with E453 shown as sticks. (C) (Top) Electrostatic surface diagram of solvent-accessible area of PI3K $\alpha$ , based on PDB 4OVU. Negatively and positively charged surfaces are colored in red and blue, respectively. The putative membrane binding surface (35) is shown in gray box with E726 shown. (D) On left, structural alignments of PDB 2RD0, 4OVU, and 3HHM PI3K $\alpha$  crystal structures in the putative membrane binding mode (as in (C)), with E726 shown as sticks and magnified on right.

**A**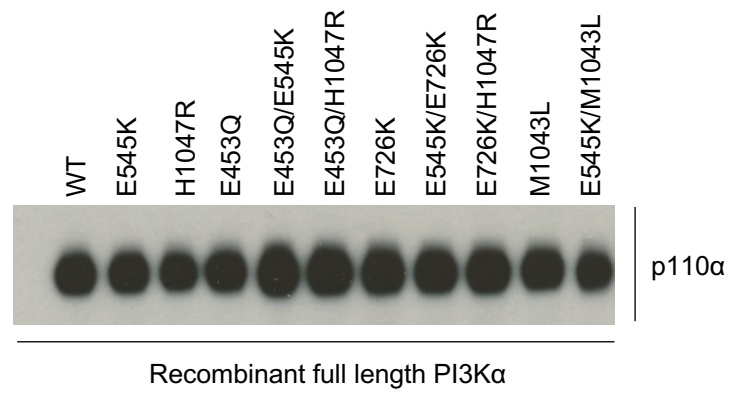**B**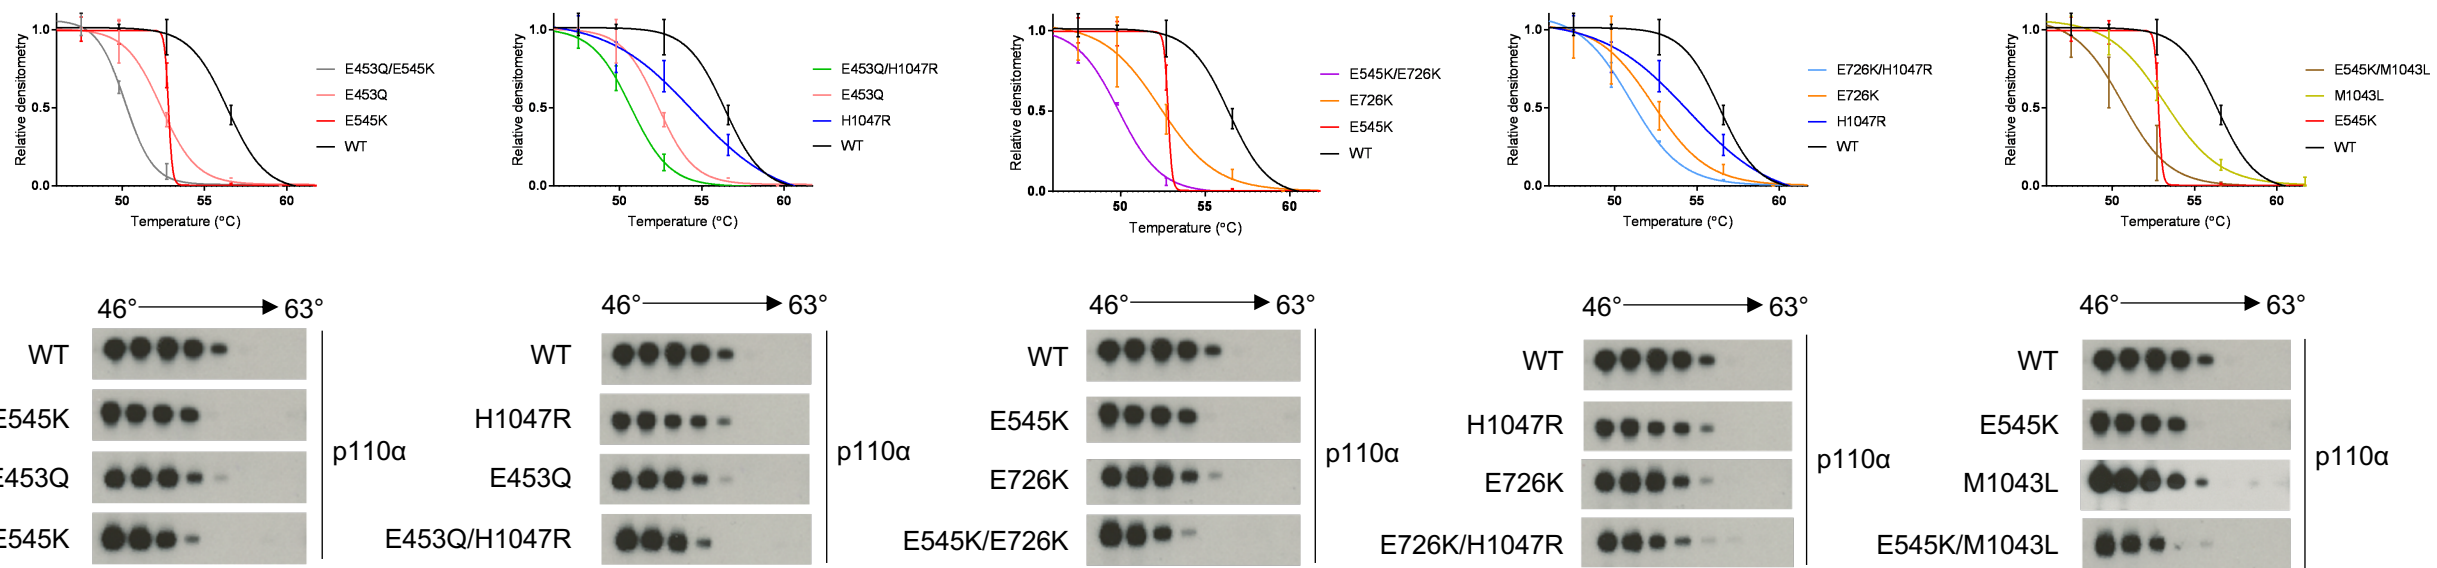**C**

|              | IC <sub>50</sub> [alpelisib] (nM) | IC <sub>50</sub> [GDC-0077] (nM) |
|--------------|-----------------------------------|----------------------------------|
| WT           | 2.28                              | 0.52                             |
| E545K        | 5.01                              | 0.35                             |
| H1047R       | 1.52                              | 0.17                             |
| E453Q        | 2.05                              | 0.45                             |
| E453Q/E545K  | 6.22                              | 0.15                             |
| E453Q/H1047R | 1.35                              | 0.15                             |
| E726K        | 3.12                              | 0.40                             |
| E545K/E726K  | 5.06                              | 0.40                             |
| E726K/H1047R | 4.94                              | 0.26                             |
| M1043L       | 3.88                              | 0.57                             |
| E545K/M1043L | 2.90                              | 0.32                             |

**Fig. S8: Biochemistry of recombinant *cis* mutant PI3K $\alpha$ .** (A) Input control of normalized amounts of *cis* and single mutant recombinant full length PI3K complexes, blotted for p110 $\alpha$ . (B) Thermal shift assays of recombinant PI3K (as in Fig. 3C), shown for clarity for each individual *cis* mutant and constitutive single mutant, with corresponding Western blots (n=2). (C) IC<sub>50</sub> values for recombinant single and *cis* PI3K mutant proteins for the PI3K $\alpha$  inhibitors alpelisib and GDC-0077. Data are averages (n=3).

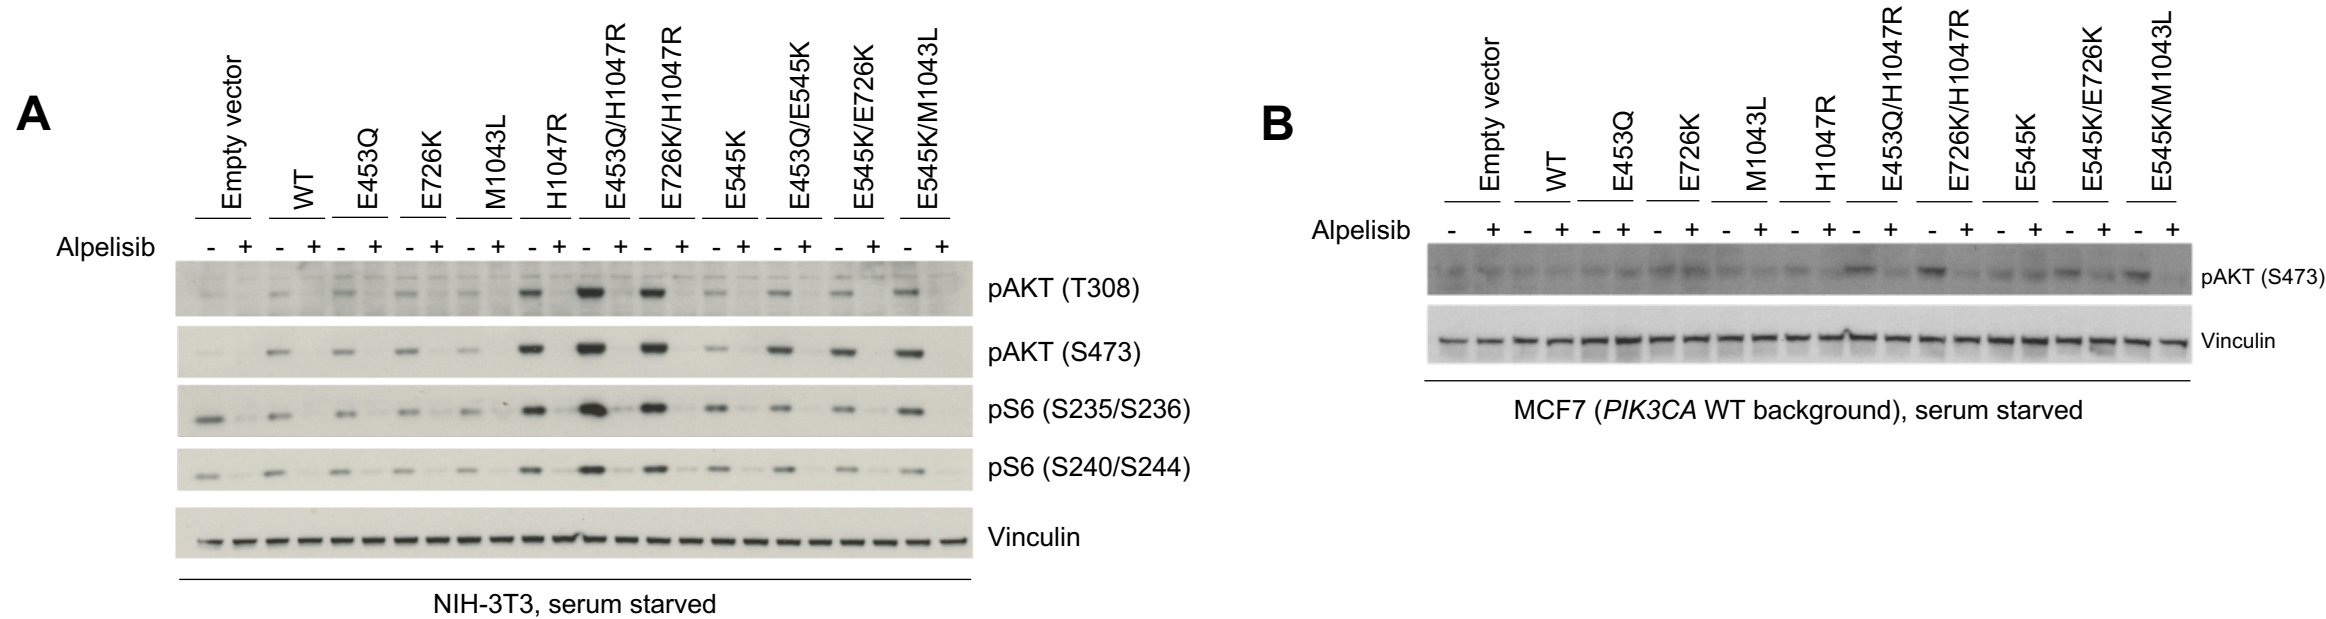

**C**

|              | IC <sub>50</sub> [alpelisib] (μM) | E <sub>max</sub> [alpelisib] | AUC [alpelisib] | IC <sub>50</sub> [GDC-0077] (μM) | E <sub>max</sub> [GDC-0077] | AUC [GDC-0077] |
|--------------|-----------------------------------|------------------------------|-----------------|----------------------------------|-----------------------------|----------------|
| Empty vector | 81.696                            | 0.649                        | 6.573           | Not reached                      | 0.695                       | 6.936          |
| WT           | 63.935                            | 0.639                        | 6.555           | Not reached                      | 0.648                       | 6.698          |
| E453Q        | 61.069                            | 0.634                        | 6.579           | Not reached                      | 0.712                       | 7.12           |
| E726K        | 60.406                            | 0.586                        | 6.162           | Not reached                      | 0.626                       | 6.55           |
| M1043L       | 48.064                            | 0.591                        | 6.18            | Not reached                      | 0.656                       | 6.736          |
| H1047R       | 3.770                             | 0.482                        | 5.129           | 0.371                            | 0.488                       | 5.394          |
| E453Q/H1047R | 0.136                             | 0.209                        | 3.281           | 0.011                            | 0.207                       | 3.461          |
| E726K/H1047R | 0.105                             | 0.155                        | 2.85            | 0.009                            | 0.168                       | 3.156          |
| E545K        | 0.397                             | 0.359                        | 4.34            | 0.057                            | 0.360                       | 4.812          |
| E545K/E726K  | 0.091                             | 0.071                        | 2.358           | 0.006                            | 0.076                       | 2.53           |
| E545K/M1043L | 0.124                             | 0.220                        | 3.23            | 0.011                            | 0.239                       | 3.574          |

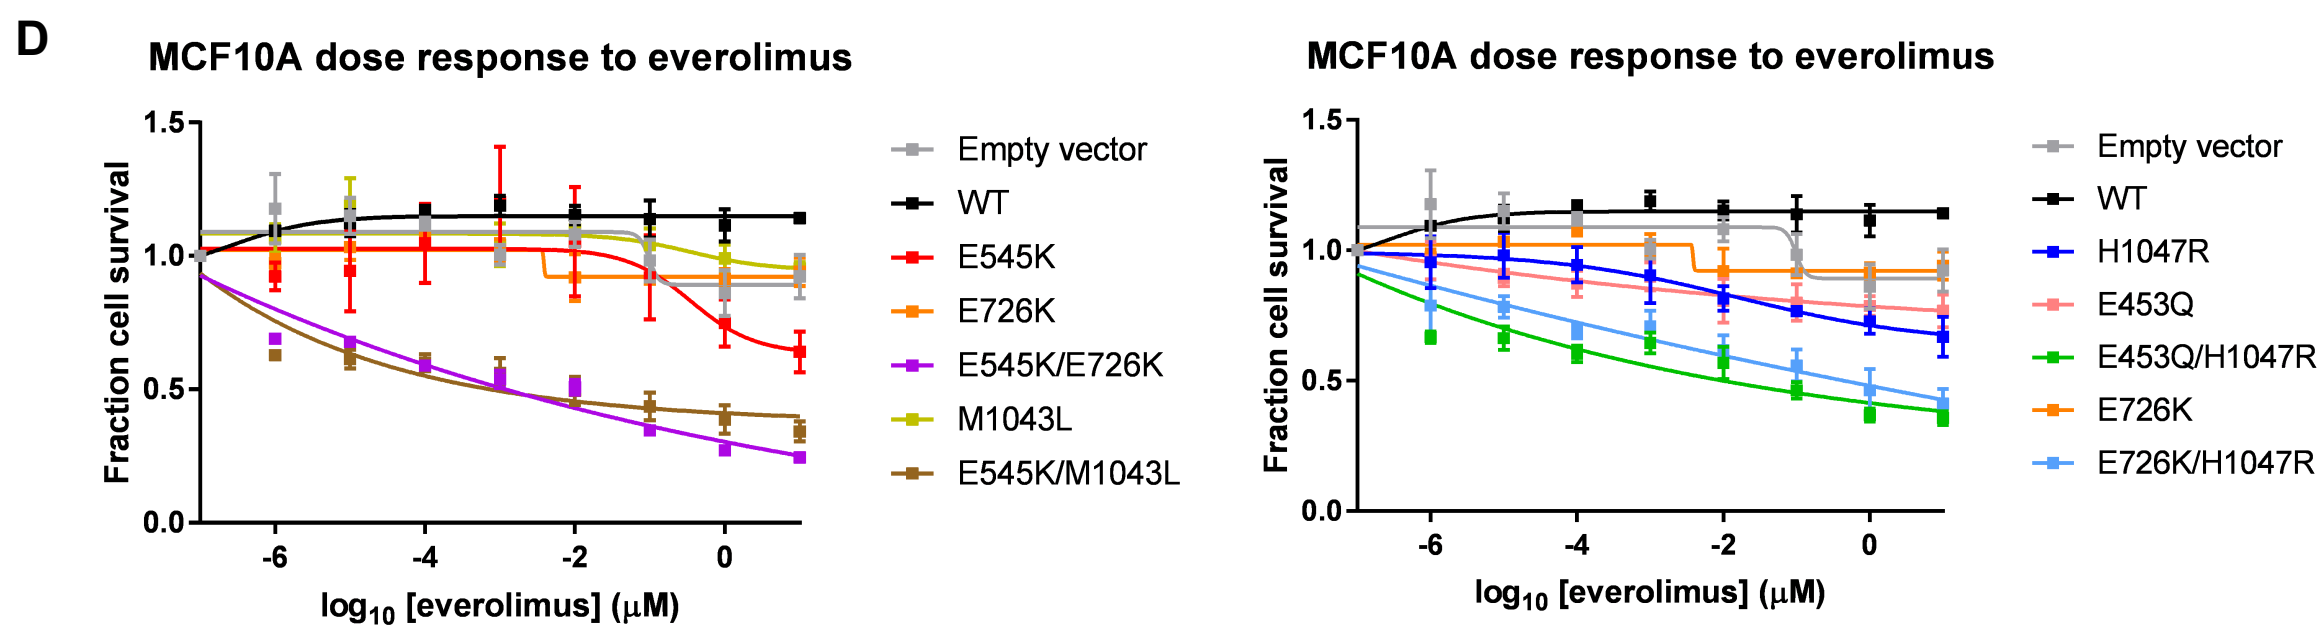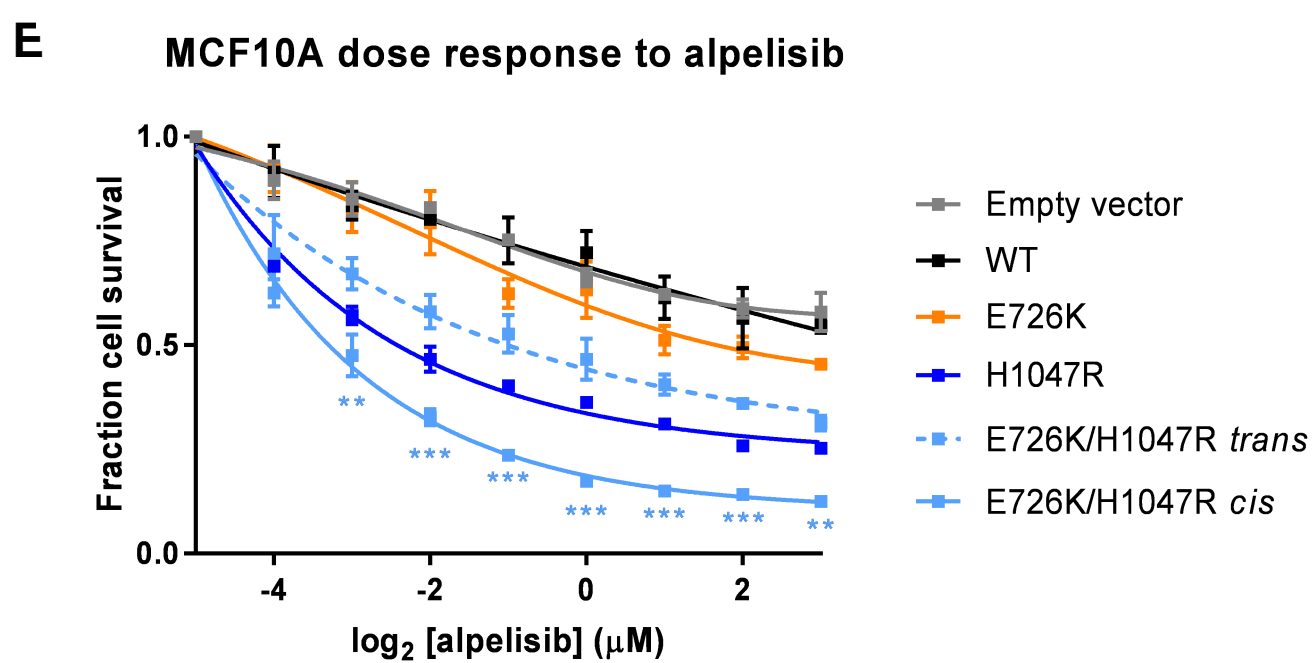

**Fig. S9: *PIK3CA* mutations in *cis* are inhibited by PI3K pathway inhibition more than single or *trans* *PIK3CA* mutants.** (A, B) Western blotting of PI3K effectors of *PIK3CA* mutant stably transduced (A) NIH-3T3 cells and (B) MCF7 cells, serum starved for 1 day then exposed to DMSO (-) or alpelisib (1  $\mu$ M) (+) for 1 hour. (C) IC<sub>50</sub>, E<sub>max</sub>, and AUC values for *PIK3CA* mutant MCF10A cells for alpelisib and GDC-0077. (D) Dose-response survival curves for MCF10A cell lines treated with everolimus under serum starvation for 4 days. E545K-containing *cis* mutants (left) and H1047R-containing *cis* mutants (right) are compared to single *PIK3CA* mutants. Data are mean  $\pm$  s.e.m. (n=3) and were fit to asymmetric, five parameter sigmoidal curves. \*\*\*\* p < 0.0001, \*\*\* p < 0.001, \*\* p < 0.01, \* p < 0.05, by two-way ANOVA corrected for multiple comparisons by Tukey's test, as compared to E545K [left] or H1047R [right]). (E) Dose-response survival curves for MCF10A cells treated with alpelisib under serum starvation for 4 days. Data are mean  $\pm$  s.e.m. (n=3) and were fit to asymmetric, five parameter sigmoidal curves. For statistics, the *trans* mutant is compared to the *cis* mutant and to H1047R. \*\*\*\* p < 0.001, \*\*\* p < 0.001, \*\* p < 0.01, NS = not significant, by two-way ANOVA corrected for multiple comparisons by Tukey's test, as compared to E726/H1047R (*trans*).

| <b>Exon</b><br><i>(standard nomenclature)</i> | <b>Exon</b><br><i>(RefSeq)</i> | <b>Encoded amino acids</b> | <b>Mutations in this study</b> |
|-----------------------------------------------|--------------------------------|----------------------------|--------------------------------|
|                                               | 1                              | Noncoding                  |                                |
| 1                                             | 2                              | M1-G118                    |                                |
| 2                                             | 3                              | G118-G188                  |                                |
| 3                                             | 4                              | G188-K271                  |                                |
| 4                                             | 5                              | Y272-K353                  |                                |
| 5                                             | 6                              | I354-R382                  |                                |
| 6                                             | 7                              | R382-E417                  |                                |
| 7                                             | 8                              | E418-K468                  | E453Q                          |
| 8                                             | 9                              | E469-L513                  |                                |
| 9                                             | 10                             | S514-R555                  | E545K                          |
| 10                                            | 11                             | R555-Q582                  |                                |
| 11                                            | 12                             | M583-Q637                  |                                |
| 12                                            | 13                             | V638-K672                  |                                |
| 13                                            | 14                             | K672-K729                  | E726K                          |
| 14                                            | 15                             | V730-R765                  |                                |
| 15                                            | 16                             | R765-D806                  |                                |
| 16                                            | 17                             | D806-R832                  |                                |
| 17                                            | 18                             | R832-I889                  |                                |
| 18                                            | 19                             | I889-Q928                  |                                |
| 19                                            | 20                             | L929-R979                  |                                |
| 20                                            | 21                             | R979-N1068                 | M1043L, H1047R                 |

**Fig. S10: *PIK3CA* exon coverage by ctDNA testing.** Exons are numbered based on historical nomenclature and RefSeq (71). Amino acids encoded by exons, and the mutations tested in this study are denoted. Exons sequenced by the Foundation Medicine Foundation One Liquid test are highlighted in blue.

**Supplementary Tables:**

**Table S1: List of multiple *PIK3CA* mutant tumors (n=576) (cBioPortal).**

**Table S2: List of multiple *PIK3CA* mutant tumors (n=451) (MSK IMPACT).**

**Table S3: Double *PIK3CA* mutant breast tumors phased as *cis* or *trans* mutants, by NGS (MSK-IMPACT).**

**Table S4: Double *PIK3CA* mutant breast tumors phased as *cis* mutants, by RNA-sequencing (TCGA).**



**Table S1: List of multiple PIK3CA mutant tumours (n=576) (cBioPortal).**

| Sample ID         | Cancer Type                             | Protein_Change_1 | Protein_Change_2 | Protein_Change_3 | Protein_Change_4 | Protein_Change_5 | Protein_Change_6 |
|-------------------|-----------------------------------------|------------------|------------------|------------------|------------------|------------------|------------------|
| AMPAC_2713        | Ampullary Carcinoma                     | Y1021C           | V146I            |                  |                  |                  |                  |
| P-0011521-T01-IM5 | Anaplastic Astrocytoma                  | E542K            | G106V            |                  |                  |                  |                  |
| P-0007319-T01-IM5 | Basaloid Penile Squamous Cell Carcinoma | E545G            | M1055I           | R617W            |                  |                  |                  |
| B52               | Bladder combined                        | E726K            | G451R            |                  |                  |                  |                  |
| B98               | Bladder combined                        | E542K            | E545Q            |                  |                  |                  |                  |
| BL033             | Bladder combined                        | E545K            | E542K            |                  |                  |                  |                  |
| DS-sig-003-P      | Bladder combined                        | M1043I           | D1017H           | E1012Q           |                  |                  |                  |
| P-0000043-T02-IM3 | Bladder combined                        | E545K            | V356A            |                  |                  |                  |                  |
| P-0000423-T01-IM3 | Bladder combined                        | E545K            | E453Q            |                  |                  |                  |                  |
| P-0002659-T01-IM3 | Bladder combined                        | E545K            | Q682H            |                  |                  |                  |                  |
| P-0004424-T01-IM5 | Bladder combined                        | E542K            | H1047R           |                  |                  |                  |                  |
| P-0009101-T01-IM5 | Bladder combined                        | E545K            | E542K            |                  |                  |                  |                  |
| P-0010921-T01-IM5 | Bladder combined                        | E542K            | E453Q            | H1065Y           |                  |                  |                  |
| TCGA-2F-A9KR-01   | Bladder combined                        | E542K            | E1012Q           |                  |                  |                  |                  |
| TCGA-4Z-AA7Y-01   | Bladder combined                        | E545G            | E545K            |                  |                  |                  |                  |
| TCGA-4Z-AA89-01   | Bladder combined                        | N345K            | R93Q             |                  |                  |                  |                  |
| TCGA-5N-A9K1-01   | Bladder combined                        | E545K            | R274K            |                  |                  |                  |                  |
| TCGA-FD-A5BX-01   | Bladder combined                        | E365K            | S66C             |                  |                  |                  |                  |
| TCGA-UY-A78P-01   | Bladder combined                        | E418K            | M1043I           |                  |                  |                  |                  |
| TCGA-XF-AAMG-01   | Bladder combined                        | E542K            | W552C            |                  |                  |                  |                  |
| TCGA-ZF-A9R2-01   | Bladder combined                        | E726K            | E710Q            |                  |                  |                  |                  |
| TCGA-ZF-A9RG-01   | Bladder combined                        | E545K            | E453K            |                  |                  |                  |                  |
| P-0004635-T01-IM5 | Breast combined                         | H1047Y           | C420R            |                  |                  |                  |                  |
| P-0000075-T01-IM3 | Breast combined                         | H1047R           | N142K            |                  |                  |                  |                  |
| P-0000107-T01-IM3 | Breast combined                         | Y1021H           | D1017E           | I1019V           |                  |                  |                  |
| P-0000138-T01-IM3 | Breast combined                         | E542K            | E453K            |                  |                  |                  |                  |
| P-0000138-T02-IM3 | Breast combined                         | E542K            | E453K            |                  |                  |                  |                  |
| P-0000155-T01-IM3 | Breast combined                         | H1047R           | D350N            |                  |                  |                  |                  |
| P-0000167-T01-IM3 | Breast combined                         | K111E            | E418K            |                  |                  |                  |                  |
| P-0000167-T02-IM3 | Breast combined                         | E542K            | K111E            |                  |                  |                  |                  |
| P-0000207-T01-IM3 | Breast combined                         | K111E            | N345K            |                  |                  |                  |                  |
| P-0000234-T01-IM3 | Breast combined                         | E542K            | M1043I           |                  |                  |                  |                  |
| P-0000234-T02-IM5 | Breast combined                         | E542K            | M1043I           |                  |                  |                  |                  |
| P-0000356-T01-IM3 | Breast combined                         | H1047R           | E453K            |                  |                  |                  |                  |
| P-0000381-T01-IM3 | Breast combined                         | H1047R           | E726K            |                  |                  |                  |                  |
| P-0000397-T01-IM3 | Breast combined                         | E542K            | E453K            |                  |                  |                  |                  |
| P-0000592-T01-IM3 | Breast combined                         | E545K            | M1043I           |                  |                  |                  |                  |
| P-0000607-T01-IM3 | Breast combined                         | H1047L           | E545Q            |                  |                  |                  |                  |
| P-0001043-T01-IM3 | Breast combined                         | H1047R           | R93L             |                  |                  |                  |                  |
| P-0001114-T02-IM3 | Breast combined                         | E545K            | E453Q            | E978Q            |                  |                  |                  |
| P-0001351-T01-IM3 | Breast combined                         | E545K            | E726K            |                  |                  |                  |                  |
| P-0001351-T02-IM5 | Breast combined                         | E545K            | E726K            |                  |                  |                  |                  |
| P-0001631-T01-IM3 | Breast combined                         | E545K            | M1043L           |                  |                  |                  |                  |
| P-0001631-T02-IM5 | Breast combined                         | E545K            | M1043L           |                  |                  |                  |                  |
| P-0001902-T01-IM3 | Breast combined                         | E542K            | E545D            |                  |                  |                  |                  |
| P-0001990-T01-IM3 | Breast combined                         | H1047Y           | N345K            |                  |                  |                  |                  |
| P-0002124-T01-IM3 | Breast combined                         | H1047R           | E365K            |                  |                  |                  |                  |
| P-0002562-T01-IM3 | Breast combined                         | E545K            | E453Q            |                  |                  |                  |                  |
| P-0002562-T02-IM5 | Breast combined                         | E545K            | E453Q            |                  |                  |                  |                  |
| P-0002657-T01-IM3 | Breast combined                         | G118D            | G364R            |                  |                  |                  |                  |
| P-0002667-T01-IM3 | Breast combined                         | H1047R           | N107I            |                  |                  |                  |                  |
| P-0002756-T02-IM5 | Breast combined                         | E545K            | E453Q            |                  |                  |                  |                  |
| P-0002841-T01-IM3 | Breast combined                         | H1047R           | K111N            |                  |                  |                  |                  |
| P-0002841-T02-IM6 | Breast combined                         | H1047R           | K111N            |                  |                  |                  |                  |
| P-0002922-T01-IM3 | Breast combined                         | H1047R           | E545Q            |                  |                  |                  |                  |
| P-0003224-T01-IM5 | Breast combined                         | H1047R           | G106V            |                  |                  |                  |                  |
| P-0003987-T01-IM5 | Breast combined                         | E545K            | H1047R           |                  |                  |                  |                  |
| P-0004187-T01-IM5 | Breast combined                         | H1047R           | E970K            |                  |                  |                  |                  |
| P-0004194-T01-IM5 | Breast combined                         | E545K            | D725G            |                  |                  |                  |                  |
| P-0004196-T01-IM5 | Breast combined                         | H1047R           | Q958K            |                  |                  |                  |                  |
| P-0004264-T01-IM5 | Breast combined                         | H1047R           | E726K            |                  |                  |                  |                  |
| P-0004433-T01-IM5 | Breast combined                         | E545K            | L252F            |                  |                  |                  |                  |
| P-0004913-T01-IM5 | Breast combined                         | H1047R           | E542A            |                  |                  |                  |                  |
| P-0005032-T01-IM5 | Breast combined                         | L455Wfs*6        | L452Qfs*5        |                  |                  |                  |                  |
| P-0005037-T01-IM5 | Breast combined                         | N345K            | R93Q             |                  |                  |                  |                  |
| P-0005120-T01-IM5 | Breast combined                         | E542K            | E726K            |                  |                  |                  |                  |
| P-0005154-T01-IM5 | Breast combined                         | E542K            | H1047R           |                  |                  |                  |                  |
| P-0005220-T01-IM5 | Breast combined                         | H1047R           | C407F            |                  |                  |                  |                  |
| P-0005242-T01-IM5 | Breast combined                         | E545K            | E726K            |                  |                  |                  |                  |
| P-0005314-T01-IM5 | Breast combined                         | E542K            | E726K            |                  |                  |                  |                  |
| P-0005611-T01-IM5 | Breast combined                         | M1043I           | E39K             |                  |                  |                  |                  |
| P-0005818-T01-IM5 | Breast combined                         | H1047R           | G118D            |                  |                  |                  |                  |
| P-0005968-T01-IM5 | Breast combined                         | R88Q             | H1047R           |                  |                  |                  |                  |
| P-0006161-T03-IM5 | Breast combined                         | E542K            | E453K            |                  |                  |                  |                  |
| P-0006166-T01-IM5 | Breast combined                         | E542K            | E726K            |                  |                  |                  |                  |
| P-0006335-T01-IM5 | Breast combined                         | E545K            | T1025A           |                  |                  |                  |                  |
| P-0006660-T01-IM5 | Breast combined                         | R88Q             | Q546H            |                  |                  |                  |                  |
| P-0006723-T01-IM5 | Breast combined                         | H1047R           | E81K             |                  |                  |                  |                  |
| P-0006780-T01-IM5 | Breast combined                         | E726K            | V344M            |                  |                  |                  |                  |
| P-0006787-T01-IM5 | Breast combined                         | H1047R           | E726K            |                  |                  |                  |                  |
| P-0007396-T01-IM5 | Breast combined                         | N345K            | E970K            |                  |                  |                  |                  |
| P-0008679-T01-IM5 | Breast combined                         | H1047R           | N345I            |                  |                  |                  |                  |
| P-0008679-T03-IM5 | Breast combined                         | H1047R           | N345I            |                  |                  |                  |                  |
| P-0008694-T01-IM5 | Breast combined                         | E542K            | E453K            |                  |                  |                  |                  |
| P-0008845-T01-IM5 | Breast combined                         | K111E            | G118D            |                  |                  |                  |                  |
| P-0009745-T02-IM6 | Breast combined                         | C420R            | E726K            |                  |                  |                  |                  |
| P-0010002-T01-IM5 | Breast combined                         | G1049R           | Q546P            |                  |                  |                  |                  |
| P-0010043-T01-IM5 | Breast combined                         | H1047R           | P539R            |                  |                  |                  |                  |
| P-0010703-T01-IM5 | Breast combined                         | H1047L           | E726K            |                  |                  |                  |                  |
| P-0010917-T01-IM5 | Breast combined                         | E542K            | E726K            |                  |                  |                  |                  |
| P-0011305-T01-IM5 | Breast combined                         | E545K            | E726K            |                  |                  |                  |                  |
| P-0011355-T01-IM5 | Breast combined                         | H1047R           | E81K             |                  |                  |                  |                  |
| P-0011420-T01-IM5 | Breast combined                         | E545K            | A1066V           |                  |                  |                  |                  |
| P-0012911-T01-IM5 | Breast combined                         | C420R            | R108H            |                  |                  |                  |                  |
| P-0013491-T01-IM5 | Breast combined                         | G118D            | E542Q            |                  |                  |                  |                  |
| P-0013771-T01-IM5 | Breast combined                         | H1047R           | E726K            |                  |                  |                  |                  |

|                   |                 |              |             |         |
|-------------------|-----------------|--------------|-------------|---------|
| P-0013895-T01-IM5 | Breast combined | E542K        | E726K       |         |
| P-0014091-T01-IM5 | Breast combined | H1047L       | E81K        |         |
| P-0014136-T01-IM5 | Breast combined | E542K        | N457K       |         |
| P-0014278-T01-IM6 | Breast combined | E542K        | E726K       |         |
| P-0014479-T01-IM6 | Breast combined | E545K        | E542Q       |         |
| P-0014480-T01-IM6 | Breast combined | E542K        | E726K       |         |
| P-0014515-T01-IM6 | Breast combined | Q546R        | M1004I      |         |
| P-0014622-T01-IM6 | Breast combined | H1047R       | P104L       |         |
| P-0014737-T01-IM6 | Breast combined | H1047L       | P539R       |         |
| P-0014860-T01-IM6 | Breast combined | H1047L       | E545D       |         |
| P-0014940-T01-IM6 | Breast combined | E542K        | E726K       |         |
| P-0014943-T01-IM6 | Breast combined | H1047R       | E542G       |         |
| P-0015005-T01-IM6 | Breast combined | E545K        | Q546R       |         |
| P-0015097-T01-IM6 | Breast combined | H1047R       | E453K       |         |
| P-0015499-T01-IM6 | Breast combined | H1047R       | E418K       |         |
| P-0015633-T01-IM6 | Breast combined | H1047L       | I112F       |         |
| P-0015640-T01-IM6 | Breast combined | N1044K       | D350N       |         |
| P-0015944-T01-IM6 | Breast combined | C420R        | E726K       |         |
| P-0015964-T01-IM6 | Breast combined | E545K        | M1004I      |         |
| P-0016773-T01-IM6 | Breast combined | G106V        | Q546H       |         |
| P-0016786-T01-IM6 | Breast combined | E545K        | M1043I      |         |
| P-0016802-T01-IM6 | Breast combined | H1047R       | G118D       |         |
| P-0016840-T01-IM6 | Breast combined | H1047R       | V344M       |         |
| P-0017581-T01-IM5 | Breast combined | E545G        | T1025A      |         |
| P-0017818-T01-IM6 | Breast combined | E545K        | H1048R      |         |
| P-0018891-T01-IM6 | Breast combined | H1047R       | N107Y       |         |
| TCGA-D8-A1JS-01   | Breast combined | H1047R       | V344M       |         |
| TCGA-LD-A74U-01   | Breast combined | E545K        | C420R       |         |
| BR-M-150          | Breast combined | E545G        | E453K       |         |
| MB-0014           | Breast combined | G1049R       | Q546H       |         |
| MB-0162           | Breast combined | L452KIs*4    | E453Dfs*7   |         |
| MB-0172           | Breast combined | E545K        | H1047R      |         |
| MB-0261           | Breast combined | H1047R       | E453K       |         |
| MB-0345           | Breast combined | H1047R       | R108H       |         |
| MB-0388           | Breast combined | E545K        | S509Y       |         |
| MB-0393           | Breast combined | E545K        | G914R       |         |
| MB-0399           | Breast combined | H1047R       | L10_P17del  |         |
| MB-0463           | Breast combined | E545K        | E726K       |         |
| MB-0475           | Breast combined | H1047R       | E81K        |         |
| MB-0554           | Breast combined | H1047R       | H1048R      | D1029H  |
| MB-0571           | Breast combined | N345K        | N1044K      |         |
| MB-0598           | Breast combined | V105del      | K148N       |         |
| MB-0623           | Breast combined | H1047R       | T727K       |         |
| MB-0632           | Breast combined | H1047R       | E80K        |         |
| MB-0904           | Breast combined | E542K        | T727K       |         |
| MB-0906           | Breast combined | H1047R       | G118D       |         |
| MB-2617           | Breast combined | H1047R       | P471L       |         |
| MB-2944           | Breast combined | Q546R        | E453K       |         |
| MB-2971           | Breast combined | E542K        | Y1021H      |         |
| MB-3254           | Breast combined | H1047R       | E453K       |         |
| MB-3295           | Breast combined | H1047R       | E365K       |         |
| MB-3344           | Breast combined | H1047R       | E453K       |         |
| MB-3824           | Breast combined | H1047L       | P449T       |         |
| MB-4343           | Breast combined | H1047R       | H1048R      |         |
| MB-4362           | Breast combined | E542K        | E970K       |         |
| MB-4607           | Breast combined | N345K        | F83C        |         |
| MB-4739           | Breast combined | E545K        | P104R       |         |
| MB-4746           | Breast combined | E542K        | M1043I      |         |
| MB-4749           | Breast combined | Y1021H       | V105del     |         |
| MB-4791           | Breast combined | M1043I       | E970K       |         |
| MB-4800           | Breast combined | L113SIs*32   | K111Dfs*16  |         |
| MB-4801           | Breast combined | H450_P458del | H1065Y      | Q1064H  |
| MB-4843           | Breast combined | H1047R       | E453Q       | E726K   |
| MB-4869           | Breast combined | H1047R       | P471L       | R108H   |
| MB-4959           | Breast combined | Q546P        | *1069Wext*4 |         |
| MB-4961           | Breast combined | H1047R       | E726K       |         |
| MB-4967           | Breast combined | H1047R       | E81K        |         |
| MB-4969           | Breast combined | E545K        | E726K       |         |
| MB-5072           | Breast combined | H1047R       | E542A       |         |
| MB-5088           | Breast combined | H1047L       | C420R       |         |
| MB-5119           | Breast combined | E726K        | N1044K      |         |
| MB-5134           | Breast combined | H1047Y       | N345K       |         |
| MB-5169           | Breast combined | E542K        | E726K       |         |
| MB-5179           | Breast combined | H1047R       | I459T       |         |
| MB-5182           | Breast combined | H1047R       | I354F       |         |
| MB-5196           | Breast combined | E545K        | E542K       |         |
| MB-5270           | Breast combined | N345K        | N114S       |         |
| MB-5275           | Breast combined | E545K        | D1017H      |         |
| MB-5288           | Breast combined | E545K        | M1043I      |         |
| MB-5401           | Breast combined | G118D        | T957P       |         |
| MB-5425           | Breast combined | H1047R       | R108H       |         |
| MB-5446           | Breast combined | R88Q         | C420R       |         |
| MB-5470           | Breast combined | H1047R       | G106R       |         |
| MB-5482           | Breast combined | H1047R       | E365K       |         |
| MB-5486           | Breast combined | Q546P        | P539R       |         |
| MB-5511           | Breast combined | H1047R       | E81A        |         |
| MB-5582           | Breast combined | H1047R       | P104L       |         |
| MB-5599           | Breast combined | H1047R       | P104R       |         |
| MB-5623           | Breast combined | E545K        | E726K       |         |
| MB-5656           | Breast combined | E545K        | E542K       | H1047R  |
| MB-6006           | Breast combined | H1047R       | E726K       |         |
| MB-6007           | Breast combined | H1047R       | E726K       |         |
| MB-6018           | Breast combined | H1047R       | R88Q        |         |
| MB-6019           | Breast combined | H1047R       | Y1021C      | E110del |
| MB-6029           | Breast combined | H1047R       | I69N        |         |
| MB-6030           | Breast combined | H1047R       | R93W        |         |
| MB-6047           | Breast combined | C420R        | E970K       |         |
| MB-6164           | Breast combined | H1047R       | H1048R      |         |

|                                        |                 |              |              |        |       |
|----------------------------------------|-----------------|--------------|--------------|--------|-------|
| MB-6194                                | Breast combined | H1047R       | K111N        |        |       |
| MB-6207                                | Breast combined | E542K        | T1025S       |        |       |
| MB-7005                                | Breast combined | H1047Y       | G118D        |        |       |
| MB-7042                                | Breast combined | E545K        | M1004I       |        |       |
| MB-7061                                | Breast combined | H1047R       | G1007R       |        |       |
| MB-7195                                | Breast combined | H1047R       | G106R        |        |       |
| MB-7200                                | Breast combined | H1047R       | R108H        |        |       |
| MB-7230                                | Breast combined | N345K        | T727K        |        |       |
| MB-7244                                | Breast combined | H1047R       | H1048R       |        |       |
| MBC-MBCProject_27uAugT4-Tumor-SM-DL45T | Breast combined | E542K        | T1025A       |        |       |
| MBC-MBCProject_57ILJII-Tumor-SM-CGLIV  | Breast combined | H1047L       | E81K         |        |       |
| TCGA-3C-AALK-01                        | Breast combined | E542K        | M1004I       |        |       |
| TCGA-A1-A0SI-01                        | Breast combined | H1047R       | E726K        |        |       |
| TCGA-A2-A0CP-01                        | Breast combined | H1047R       | E726K        |        |       |
| TCGA-A2-A0EV-01                        | Breast combined | H1047R       | E469delinsDK |        |       |
| TCGA-A2-A0T7-01                        | Breast combined | E542K        | M1043I       |        |       |
| TCGA-A8-A075-01                        | Breast combined | E545K        | E453K        |        |       |
| TCGA-A8-A095-01                        | Breast combined | H1047L       | E726K        |        |       |
| TCGA-AC-A23H-01                        | Breast combined | D603H        | L989V        |        |       |
| TCGA-AN-A0XO-01                        | Breast combined | E453K        | E542K        |        |       |
| TCGA-AO-A0JC-01                        | Breast combined | R108H        | E545K        |        |       |
| TCGA-AO-A0JF-01                        | Breast combined | E545K        | E453K        |        |       |
| TCGA-AO-A12A-01                        | Breast combined | E545G        | E542K        |        |       |
| TCGA-AO-A1KR-01                        | Breast combined | H1047R       | M1004I       |        |       |
| TCGA-B6-A0RO-01                        | Breast combined | H1047R       | P539R        |        |       |
| TCGA-BH-A0B6-01                        | Breast combined | E453K        | E81K         |        |       |
| TCGA-BH-A0BT-01                        | Breast combined | H1047R       | P366R        |        |       |
| TCGA-BH-A0DV-01                        | Breast combined | E545K        | E726K        | E726G  |       |
| TCGA-BH-A0W7-01                        | Breast combined | H1047R       | E726K        |        |       |
| TCGA-BH-A18F-01                        | Breast combined | H1047R       | Q546K        |        |       |
| TCGA-BH-A202-01                        | Breast combined | H1047R       | E365V        |        |       |
| TCGA-C8-A131-01                        | Breast combined | H1047R       | R108H        |        |       |
| TCGA-C8-A278-01                        | Breast combined | H1047L       | M1040V       |        |       |
| TCGA-D8-A1JD-01                        | Breast combined | E545K        | E726K        | M1004I |       |
| TCGA-D8-A1JF-01                        | Breast combined | E545K        | R398H        |        |       |
| TCGA-D8-A1JG-01                        | Breast combined | P447_L455del | L456Afs*13   |        |       |
| TCGA-E2-A159-01                        | Breast combined | E542K        | E542G        |        |       |
| TCGA-E2-A1IN-01                        | Breast combined | E542K        | C901F        |        |       |
| TCGA-E9-A1RH-01                        | Breast combined | E103_P104del | L531V        |        |       |
| TCGA-EW-A1P5-01                        | Breast combined | P447_L455del | L456Afs*13   |        |       |
| TCGA-EW-A1PE-01                        | Breast combined | Q546K        | T1025A       |        |       |
| TCGA-GM-A2D9-01                        | Breast combined | H1047R       | E453K        |        |       |
| TCGA-GM-A2DH-01                        | Breast combined | Q546R        | G1007R       |        |       |
| TCGA-OL-A5RX-01                        | Breast combined | D939G        | P366R        |        |       |
| BR-M-083                               | Breast combined | H1047R       | E542Q        |        |       |
| MB-0083                                | Breast combined | N345K        | E81K         |        |       |
| MB-0101                                | Breast combined | H1047L       | E726K        |        |       |
| MB-0188                                | Breast combined | E542K        | E726K        |        |       |
| MB-0306                                | Breast combined | H1047R       | E726K        |        |       |
| MB-0578                                | Breast combined | E545K        | M1043V       |        |       |
| MB-2840                                | Breast combined | N345K        | M1043I       |        |       |
| MB-4484                                | Breast combined | H1047R       | P471A        |        |       |
| MB-4697                                | Breast combined | N345K        | E726K        |        |       |
| MB-4743                                | Breast combined | E545K        | M1004I       |        |       |
| MB-4764                                | Breast combined | E542K        | E726K        |        |       |
| MB-4802                                | Breast combined | E81K         | D1017H       |        |       |
| MB-5035                                | Breast combined | E542K        | E726K        |        |       |
| MB-5107                                | Breast combined | K111E        | G320A        |        |       |
| MB-5326                                | Breast combined | K111E        | M1043I       |        |       |
| MB-6021                                | Breast combined | H1047R       | N345K        |        |       |
| MB-7268                                | Breast combined | E545K        | E726K        |        |       |
| TCGA-A2-A0EN-01                        | Breast combined | H1047R       | H1065L       |        |       |
| TCGA-AC-A5XS-01                        | Breast combined | E545G        | E545K        | C378F  | E545R |
| TCGA-B6-A0IP-01                        | Breast combined | R88Q         | H1047R       | F83L   |       |
| TCGA-B6-A0RQ-01                        | Breast combined | E542G        | E545K        |        |       |
| TCGA-E2-A10F-01                        | Breast combined | H1047R       | E726K        |        |       |
| TCGA-E2-A14U-01                        | Breast combined | E542K        | H1047R       |        |       |
| TCGA-E2-A2P5-01                        | Breast combined | N345K        | G914R        |        |       |
| TCGA-EW-A1J5-01                        | Breast combined | E545K        | E726K        |        |       |
| TCGA-JL-A3YX-01                        | Breast combined | E542K        | E726K        |        |       |
| TCGA-LQ-A4E4-01                        | Breast combined | H1047R       | E542G        |        |       |
| MB-0171                                | Breast combined | E365K        | C420R        |        |       |
| MB-0353                                | Breast combined | H1047R       | G118D        |        |       |
| MB-0356                                | Breast combined | H1047R       | H1048R       |        |       |
| MB-0379                                | Breast combined | E545K        | G320A        |        |       |
| MB-0504                                | Breast combined | H1047R       | R108H        |        |       |
| MB-0653                                | Breast combined | H1047L       | E385K        |        |       |
| MB-0897                                | Breast combined | E542K        | E726K        |        |       |
| MB-5412                                | Breast combined | H1047R       | R108H        |        |       |
| MB-6022                                | Breast combined | E545A        | G1050S       |        |       |
| MB-0170                                | Breast combined | N345K        | N1044K       |        |       |
| MB-0295                                | Breast combined | H1047R       | P104L        |        |       |
| MB-0363                                | Breast combined | E542K        | N345K        |        |       |
| MB-0891                                | Breast combined | H1047R       | K111E        |        |       |
| MB-2790                                | Breast combined | E726K        | P449_L452del |        |       |
| MB-3181                                | Breast combined | M1043V       | E726K        |        |       |
| MB-3228                                | Breast combined | E545K        | D725N        |        |       |
| MB-3439                                | Breast combined | E542K        | D1045N       | Q1064H |       |
| MB-3490                                | Breast combined | H1047R       | R88Q         |        |       |
| MB-3871                                | Breast combined | N345K        | S161R        |        |       |
| MB-7006                                | Breast combined | E545K        | E542K        | E726K  | D725N |
| MBC_109                                | Breast combined | E545K        | E726K        |        |       |
| MBC_187                                | Breast combined | H1047R       | P366R        |        |       |
| MBC_189                                | Breast combined | E542K        | E726K        |        |       |
| MBC_29                                 | Breast combined | H1047R       | Q546K        |        |       |
| MBC_45                                 | Breast combined | E545K        | E726K        |        |       |
| MBC_50                                 | Breast combined | E545K        | E385K        |        |       |
| MBC_95                                 | Breast combined | E542K        | E453K        |        |       |

|                          |                           |              |             |        |       |
|--------------------------|---------------------------|--------------|-------------|--------|-------|
| MTS-T0035                | Breast combined           | H1047R       | N345I       |        |       |
| MTS-T0065                | Breast combined           | H1047R       | E263Q       |        |       |
| MTS-T0207                | Breast combined           | H1047L       | N1068K      |        |       |
| MTS-T0255                | Breast combined           | E542K        | H1047R      |        |       |
| MTS-T0327                | Breast combined           | H1047R       | R108H       |        |       |
| MTS-T0340                | Breast combined           | E545A        | E726K       |        |       |
| MTS-T0351                | Breast combined           | N1044K       | E1032Q      | D1045H |       |
| MTS-T0380                | Breast combined           | H1047R       | P104L       |        |       |
| MTS-T0396                | Breast combined           | E545K        | E726K       |        |       |
| MTS-T1284                | Breast combined           | E542K        | M1043I      |        |       |
| MTS-T1800                | Breast combined           | E542K        | E726K       |        |       |
| MTS-T2408                | Breast combined           | H1047R       | Q958K       |        |       |
| MTS-T2413                | Breast combined           | E542K        | E726K       |        |       |
| PD4120a                  | Breast combined           | H1047R       | K111N       |        |       |
| PD4125a                  | Breast combined           | E81K         | E80K        |        |       |
| PD4202a                  | Breast combined           | H1047R       | P104L       |        |       |
| PD4844a                  | Breast combined           | L113_N114del | M1040T      |        |       |
| P-0004374-T01-IM5        | Cancer of Unknown Primary | E542K        | D454G       |        |       |
| P-0008153-T01-IM5        | Cancer of Unknown Primary | H1047R       | R88Q        |        |       |
| P-0010527-T01-IM5        | Cervical combined         | E545K        | E542K       |        |       |
| TCGA-2W-A8YY-01          | Cervical combined         | R88Q         | R693H       | Y432C  | D589N |
| TCGA-C5-A1BJ-01          | Cervical combined         | E545Q        | E600K       |        |       |
| TCGA-C5-A1MH-01          | Cervical combined         | E545K        | E726K       |        |       |
| TCGA-C5-A1MK-01          | Cervical combined         | E545K        | E726K       |        |       |
| TCGA-C5-A8XJ-01          | Cervical combined         | E545K        | L866F       |        |       |
| TCGA-EK-A2RN-01          | Cervical combined         | E545K        | E726K       |        |       |
| TCGA-FU-A3HZ-01          | Cervical combined         | L339I        | E542K       |        |       |
| TCGA-VS-A8QA-01          | Cervical combined         | E726K        | E453K       |        |       |
| TCGA-VS-A959-01          | Cervical combined         | E542K        | E453K       |        |       |
| TCGA-IR-A3LF-01          | Cervical combined         | E542K        | G1007R      |        |       |
| TCGA-LP-A7HU-01          | Cervical combined         | E545K        | E542K       |        |       |
| TCGA-AA-3489-01          | Colorectal combined       | G1049R       | D350G       |        |       |
| TCGA-AA-3675-01          | Colorectal combined       | H1047Y       | V344G       |        |       |
| TCGA-AA-3848-01          | Colorectal combined       | R88Q         | D350G       |        |       |
| TCGA-AA-3977-01          | Colorectal combined       | R88Q         | M1043I      |        |       |
| TCGA-AA-3984-01          | Colorectal combined       | E970K        | R357Q       |        |       |
| TCGA-AD-A5EJ-01          | Colorectal combined       | H1047R       | E542G       |        |       |
| TCGA-AM-5821-01          | Colorectal combined       | H1047R       | A224S       |        |       |
| TCGA-AY-A69D-01          | Colorectal combined       | C420R        | E722K       |        |       |
| TCGA-AZ-4315-01          | Colorectal combined       | R88Q         | H1048R      | E81*   |       |
| TCGA-CA-5255-01          | Colorectal combined       | E545A        | H1047R      |        |       |
| TCGA-CA-6718-01          | Colorectal combined       | R88Q         | H1047Q      | M732I  |       |
| TCGA-DM-A0X9-01          | Colorectal combined       | E545K        | E970K       |        |       |
| TCGA-DM-A28A-01          | Colorectal combined       | H1047Y       | V344G       |        |       |
| TCGA-F4-6569-01          | Colorectal combined       | H1047Y       | R357Q       |        |       |
| TCGA-F4-6907-01          | Colorectal combined       | M1043I       | R108H       |        |       |
| TCGA-NH-A50T-01          | Colorectal combined       | E542K        | P104R       |        |       |
| TCGA-QG-A5YX-01          | Colorectal combined       | H1047R       | E542G       |        |       |
| 587220                   | Colorectal combined       | H1047R       | K111N       |        |       |
| 587224                   | Colorectal combined       | H1047R       | K111E       |        |       |
| 587260                   | Colorectal combined       | R88Q         | E545A       |        |       |
| 587356                   | Colorectal combined       | T1052K       | H419N       |        |       |
| P-0000788-T01-IM3        | Colorectal combined       | E542K        | M1010I      |        |       |
| P-0001215-T01-IM3        | Colorectal combined       | E365K        | I816N       | R992*  |       |
| P-0001289-T01-IM3        | Colorectal combined       | H1047R       | V344G       |        |       |
| P-0001732-T01-IM3        | Colorectal combined       | E542K        | M1043I      |        |       |
| P-0001940-T01-IM3        | Colorectal combined       | H1047R       | G118D       |        |       |
| P-0002413-T01-IM3        | Colorectal combined       | Q546K        | E726K       |        |       |
| P-0003513-T01-IM5        | Colorectal combined       | E365K        | H1047Q      |        |       |
| P-0003720-T01-IM5        | Colorectal combined       | H1047R       | R93Q        |        |       |
| P-0004566-T01-IM5        | Colorectal combined       | E545K        | H1047R      |        |       |
| P-0004865-T01-IM5        | Colorectal combined       | E542K        | K111N       |        |       |
| P-0004928-T01-IM5        | Colorectal combined       | E545K        | E542K       |        |       |
| P-0006170-T01-IM5        | Colorectal combined       | E545G        | Q75H        |        |       |
| P-0006581-T01-IM5        | Colorectal combined       | E545K        | L540F       |        |       |
| P-0006612-T01-IM5        | Colorectal combined       | M1043I       | R693C       |        |       |
| P-0007147-T01-IM5        | Colorectal combined       | R88Q         | H1047R      |        |       |
| P-0007272-T01-IM5        | Colorectal combined       | R38C         | R357L       |        |       |
| P-0007836-T01-IM5        | Colorectal combined       | E110del      | R93Q        | E418D  |       |
| P-0008721-T01-IM5        | Colorectal combined       | H1047R       | A289T       |        |       |
| P-0010125-T01-IM5        | Colorectal combined       | G364R        | V125E       |        |       |
| P-0010167-T01-IM5        | Colorectal combined       | H1047R       | V851A       |        |       |
| P-0011071-T01-IM5        | Colorectal combined       | E542K        | R108S       |        |       |
| P-0011357-T01-IM5        | Colorectal combined       | K111N        | M1004I      | R357*  |       |
| P-0013010-T01-IM5        | Colorectal combined       | H1047R       | C420R       |        |       |
| P-0013020-T01-IM5        | Colorectal combined       | H1047R       | Q546R       |        |       |
| coadread_dfc_i_2016_1240 | Colorectal combined       | E542K        | E726K       |        |       |
| coadread_dfc_i_2016_1762 | Colorectal combined       | Q546R        | *1069Wext*4 |        |       |
| coadread_dfc_i_2016_2271 | Colorectal combined       | E542K        | F83S        |        |       |
| coadread_dfc_i_2016_250  | Colorectal combined       | G1007R       | R93W        |        |       |
| coadread_dfc_i_2016_2641 | Colorectal combined       | H1047R       | R38S        |        |       |
| coadread_dfc_i_2016_2664 | Colorectal combined       | E542K        | E982K       |        |       |
| coadread_dfc_i_2016_2936 | Colorectal combined       | E545K        | C604R       |        |       |
| coadread_dfc_i_2016_3010 | Colorectal combined       | K111E        | V344E       |        |       |
| coadread_dfc_i_2016_3022 | Colorectal combined       | E545K        | R88Q        |        |       |
| coadread_dfc_i_2016_3237 | Colorectal combined       | H1047R       | R93W        |        |       |
| coadread_dfc_i_2016_328  | Colorectal combined       | G1007R       | L1006H      |        |       |
| coadread_dfc_i_2016_3298 | Colorectal combined       | R88Q         | C604R       |        |       |
| coadread_dfc_i_2016_3535 | Colorectal combined       | R88Q         | H1047R      |        |       |
| coadread_dfc_i_2016_3611 | Colorectal combined       | R88Q         | R818C       |        |       |
| coadread_dfc_i_2016_4508 | Colorectal combined       | E542K        | G106V       |        |       |
| coadread_dfc_i_2016_578  | Colorectal combined       | R88Q         | K111N       |        |       |
| coadread_dfc_i_2016_60   | Colorectal combined       | E542K        | C378R       |        |       |
| TCGA-AA-3821-01          | Colorectal combined       | H1047L       | M1043I      |        |       |
| TCGA-AA-3837-01          | Colorectal combined       | R88Q         | N345K       |        |       |
| TCGA-AA-3852-01          | Colorectal combined       | E81K         | G106R       | E545Q  |       |
| TCGA-AA-A00N-01          | Colorectal combined       | R357Q        | Y1021C      | V344A  |       |
| TCGA-CA-6717-01          | Colorectal combined       | R88Q         | E970K       | S1015Y |       |

|                   |                                      |                   |                    |        |         |       |
|-------------------|--------------------------------------|-------------------|--------------------|--------|---------|-------|
| TCGA-CM-6162-01   | Colorectal combined                  | R88Q              | R108H              |        |         |       |
| P-0009189-T01-IM5 | Cutaneous Melanoma                   | S67F              | L402F              |        |         |       |
| P-0009752-T01-IM5 | Cutaneous Melanoma                   | H14Y              | S326F              |        |         |       |
| TCGA-DA-A11B-06   | Cutaneous Melanoma                   | E674D             | Q682K              |        |         |       |
| P-0001198-T01-IM3 | Cutaneous Squamous Cell Carcinoma    | E542K             | C24S               | S66F   | W780*   |       |
| TCGA-IC-A6RE-01   | Esophageal Adenocarcinoma            | E545K             | K111N              |        |         |       |
| TCGA-XP-A8T7-01   | Esophageal Squamous Cell Carcinoma   | E726K             | M441I              |        |         |       |
| PGM4              | Esophagogastric Adenocarcinoma       | E545K             | I13S               |        |         |       |
| P-0004531-T01-IM5 | Glioma combined                      | E545G             | C420R              |        |         |       |
| TCGA-DU-A5TT-01   | Glioma combined                      | K111E             | Q546E              |        |         |       |
| TCGA-S9-A6TW-01   | Glioma combined                      | E110del           | N345Y              |        |         |       |
| P18_Rec           | Glioma combined                      | E542K             | L540V              |        |         |       |
| P-0000500-T01-IM3 | Glioma combined                      | E545K             | E542K              |        |         |       |
| P-0002633-T01-IM3 | Glioma combined                      | Q546R             | R88Q               |        |         |       |
| P-0002695-T01-IM3 | Glioma combined                      | E545K             | E116K              |        |         |       |
| P-0008649-T01-IM5 | Glioma combined                      | H1047R            | L436_P449dup       |        |         |       |
| TCGA-06-0210-02   | Glioma combined                      | E545K             | R38H               |        |         |       |
| TCGA-06-0879-01   | Glioma combined                      | L455_G460delinsF  | E453_G460delinsDDF | E453D  |         |       |
| TCGA-06-5416-01   | Glioma combined                      | R88Q              | E81K               | S292I  |         |       |
| TCGA-12-5301-01   | Glioma combined                      | R88Q              | R108H              |        |         |       |
| TCGA-19-5954-01   | Glioma combined                      | K111R             | R4*                |        |         |       |
| TCGA-HT-7481-01   | Glioma combined                      | E453del           | G118D              | M1043V |         |       |
| OSCM-PT01-166-T   | Head and Neck Carcinoma              | K111E             | T1052A             |        |         |       |
| TCGA-BA-A8YP-01   | Head and Neck Carcinoma              | E418K             | C420R              |        |         |       |
| TCGA-CR-6471-01   | Head and Neck Carcinoma              | R88Q              | M1043V             |        |         |       |
| TCGA-CR-7404-01   | Head and Neck Carcinoma              | E545K             | E542K              |        |         |       |
| TCGA-CV-7568-01   | Head and Neck Carcinoma              | P104L             | Y606C              |        |         |       |
| P-0001105-T01-IM3 | High-Grade Serous Ovarian Cancer     | R108H             | C378F              |        |         |       |
| P-0002286-T01-IM3 | Intrahepatic Cholangiocarcinoma      | E545K             | C420R              |        |         |       |
| LO3793            | Lung combined                        | R88Q              | E418K              |        |         |       |
| LJAD-S01473-Tumor | Lung combined                        | E545K             | E453Q              |        |         |       |
| P-0005985-T01-IM5 | Lung combined                        | PIK3CA-intragenic | E545K              |        |         |       |
| P-0009431-T01-IM5 | Lung combined                        | E81K              | R93W               |        |         |       |
| TCGA-73-7499-01   | Lung combined                        | M123_P124delinsIA | M123I              | P124A  | MP123IA |       |
| P-0011388-T01-IM5 | Lung combined                        | D1029H            | D1045N             | E982Q  |         |       |
| TCGA-18-5595-01   | Lung combined                        | E545K             | E726K              |        |         |       |
| TCGA-21-1078-01   | Lung combined                        | E542K             | D538N              |        |         |       |
| TCGA-33-A4WN-01   | Lung combined                        | E542K             | P539S              | F667L  |         |       |
| TCGA-60-2721-01   | Lung combined                        | E542K             | G1049R             |        |         |       |
| A14               | Lung combined                        | E529G             | G1049S             |        |         |       |
| MB-REC-31         | Medulloblastoma                      | H1047L            | Q958K              |        |         |       |
| PIP14-47205-T1    | Mixed Cancer Types                   | N345K             | I391M              |        |         |       |
| TCGA-VS-A9UT-01   | Mucinous Carcinoma                   | E418K             | G106R              |        |         |       |
| TCGA-VS-A9UZ-01   | Mucinous Carcinoma                   | E545K             | E453Q              |        |         |       |
| P-0002411-T01-IM3 | Nasopharyngeal Carcinoma             | E545K             | D538Y              |        |         |       |
| P-0000650-T01-IM3 | Non-Seminomatous Germ Cell Tumor     | K724del           | E542K              |        |         |       |
| P-0005212-T01-IM5 | Oropharynx Squamous Cell Carcinoma   | E542K             | E78K               |        |         |       |
| P-0009761-T01-IM5 | Oropharynx Squamous Cell Carcinoma   | E545K             | E579K              |        |         |       |
| TCGA-5P-A9K3-01   | Papillary Renal Cell Carcinoma       | E542K             | R38C               |        |         |       |
| P-0003178-T01-IM5 | Poorly Differentiated Thyroid Cancer | E542K             | H1047R             |        |         |       |
| TCGA-EJ-A65D-01   | Prostate Adenocarcinoma              | *1069fs*          | R88Q               |        |         |       |
| TCGA-HC-7081-01   | Prostate Adenocarcinoma              | E542A             | N345J              |        |         |       |
| TCGA-XK-AAIW-01   | Prostate Adenocarcinoma              | R108C             | L569I              |        |         |       |
| TCGA-AG-A015-01   | Rectal Adenocarcinoma                | Q546K             | D350G              |        |         |       |
| TCGA-AH-6903-01   | Rectal Adenocarcinoma                | H1047R            | E726K              |        |         |       |
| TCGA-EI-6917-01   | Rectal Adenocarcinoma                | R88Q              | E116K              |        |         |       |
| TCGA-F5-6814-01   | Rectal Adenocarcinoma                | K337N             | E469A              |        |         |       |
| P-0000957-T01-IM3 | Salivary Duct Carcinoma              | *1069F            | M1004I             |        |         |       |
| TCGA-HU-8608-01   | Stomach combined                     | E365K             | N345K              |        |         |       |
| TCGA-VQ-A91K-01   | Stomach combined                     | G1049R            | E453K              |        |         |       |
| TCGA-VQ-A91W-01   | Stomach combined                     | E542K             | G364R              |        |         |       |
| TCGA-VQ-A8P2-01   | Stomach combined                     | R88Q              | D350N              |        |         |       |
| P-0009918-T01-IM5 | Stomach combined                     | H1047R            | V344M              | K111N  |         |       |
| TCGA-BR-4371-01   | Stomach combined                     | E545K             | H1047R             |        |         |       |
| TCGA-BR-6452-01   | Stomach combined                     | R412Q             | H1047R             | E547K  | K179E   | V243A |
| TCGA-BR-6706-01   | Stomach combined                     | E545K             | E453K              |        |         |       |
| TCGA-BR-8284-01   | Stomach combined                     | E542K             | Q546K              |        |         |       |
| TCGA-BR-8366-01   | Stomach combined                     | G118D             | Y182H              |        |         |       |
| TCGA-BR-8591-01   | Stomach combined                     | R88Q              | C378R              |        |         |       |
| TCGA-BR-8676-01   | Stomach combined                     | E542K             | E453K              |        |         |       |
| TCGA-CG-5721-01   | Stomach combined                     | K111E             | K948E              |        |         |       |
| TCGA-F1-6177-01   | Stomach combined                     | R93Q              | Q546H              |        |         |       |
| TCGA-BR-8686-01   | Stomach combined                     | E542K             | R88Q               |        |         |       |
| TCGA-D7-5577-01   | Stomach combined                     | R88Q              | M1043I             |        |         |       |
| TCGA-HU-A4GQ-01   | Stomach combined                     | R93W              | Y1021H             |        |         |       |
| TCGA-VQ-A8PF-01   | Stomach combined                     | R88Q              | G106V              |        |         |       |
| DS-uttc-042-P     | Upper Tract Urothelial Carcinoma     | H1047L            | D1029Y             |        |         |       |
| DS-uttc-060-P     | Upper Tract Urothelial Carcinoma     | F261V             | Q958H              | R349*  |         |       |
| P-0004330-T01-IM5 | Upper Tract Urothelial Carcinoma     | R93Q              | R310C              |        |         |       |
| P-0004688-T01-IM5 | Upper Tract Urothelial Carcinoma     | R108H             | G1007D             | T322I  |         |       |
| P-0010803-T01-IM5 | Upper Tract Urothelial Carcinoma     | H1047Y            | E542V              |        |         |       |
| MM04T             | Uterine combined                     | R88Q              | R357Q              |        |         |       |
| MM18T             | Uterine combined                     | R818C             | R916C              | R992*  |         |       |
| P-0002357-T01-IM3 | Uterine combined                     | H1047Y            | D1029H             |        |         |       |
| TCGA-N7-A4Y8-01   | Uterine combined                     | E545K             | H1047R             |        |         |       |
| TCGA-ND-A4WC-01   | Uterine combined                     | R88Q              | R108H              |        |         |       |
| P-0006269-T01-IM5 | Uterine combined                     | H1047Y            | V344M              |        |         |       |
| P-0000404-T01-IM3 | Uterine combined                     | K111E             | P449R              |        |         |       |
| P-0000448-T01-IM3 | Uterine combined                     | V344M             | T1025A             |        |         |       |
| P-0003767-T01-IM5 | Uterine combined                     | H1047R            | E453del            |        |         |       |
| P-0004136-T01-IM5 | Uterine combined                     | E542K             | I1058L             |        |         |       |
| P-0004255-T01-IM5 | Uterine combined                     | H1047R            | R88Q               |        |         |       |
| P-0006201-T01-IM5 | Uterine combined                     | R93W              | E365K              |        |         |       |
| P-0009316-T01-IM5 | Uterine combined                     | E545K             | H1047Y             |        |         |       |
| P-0010967-T01-IM5 | Uterine combined                     | R88Q              | E81K               |        |         |       |
| P-0011569-T01-IM5 | Uterine combined                     | R88Q              | Y1021C             | R93Q   | L779M   |       |
| P-0011570-T01-IM5 | Uterine combined                     | D549N             | F83S               | L339I  |         |       |
| P-0012113-T01-IM5 | Uterine combined                     | R88Q              | T1025A             | Q958R  |         |       |

|                   |                  |               |        |             |       |        |        |
|-------------------|------------------|---------------|--------|-------------|-------|--------|--------|
| P-0012152-T01-IM5 | Uterine combined | E545G         | P97H   |             |       |        |        |
| P-0012358-T01-IM5 | Uterine combined | R88Q          | L937I  | R115Q       |       | R537Q  |        |
| P-0012397-T01-IM5 | Uterine combined | R88Q          | Y1021C | R852Q       |       |        |        |
| TCGA-4E-A92E-01   | Uterine combined | E542K         | M1043I |             |       |        |        |
| TCGA-A5-A0GB-01   | Uterine combined | R108H         | G359R  |             |       |        |        |
| TCGA-A5-A0GP-01   | Uterine combined | R88Q          | G118D  |             |       |        |        |
| TCGA-A5-A0RA-01   | Uterine combined | W11_P18del    | R115L  |             |       |        |        |
| TCGA-A5-A0VP-01   | Uterine combined | R88Q          | E542V  |             |       |        |        |
| TCGA-A5-A2K5-01   | Uterine combined | R88Q          | M1043I |             |       |        |        |
| TCGA-AJ-A3BH-01   | Uterine combined | R108H         | D1045A |             |       |        |        |
| TCGA-AJ-A3EK-01   | Uterine combined | R88Q          | R93W   |             |       |        |        |
| TCGA-AJ-A3EL-01   | Uterine combined | R88Q          | I816S  |             |       |        |        |
| TCGA-AJ-A8CW-01   | Uterine combined | R88Q          | H1047R |             |       |        |        |
| TCGA-AP-A054-01   | Uterine combined | M1043I        | L866W  |             |       |        |        |
| TCGA-AP-A056-01   | Uterine combined | R88Q          | Y1021C |             |       |        |        |
| TCGA-AP-A0LD-01   | Uterine combined | R38H          | R108H  |             |       |        |        |
| TCGA-AP-A0LM-01   | Uterine combined | R818C         | D350N  | N170S       | L279I |        | D454Y  |
| TCGA-AP-A0LS-01   | Uterine combined | H1047Y        | P449S  |             |       |        |        |
| TCGA-AP-A1DK-01   | Uterine combined | R88Q          | M811I  |             |       |        |        |
| TCGA-AP-A1DV-01   | Uterine combined | E545G         | T1025A |             |       |        |        |
| TCGA-AP-A1E0-01   | Uterine combined | R88Q          | M1043I | F667L       |       |        |        |
| TCGA-AP-A1E1-01   | Uterine combined | Q546K         | Y1021C |             |       |        |        |
| TCGA-AX-A05Z-01   | Uterine combined | T1025A        | S576Y  | L997I       |       |        |        |
| TCGA-AX-A060-01   | Uterine combined | C604R         | V344A  |             |       |        |        |
| TCGA-AX-A06J-01   | Uterine combined | C378F         | G118D  |             |       |        |        |
| TCGA-AX-A0J0-01   | Uterine combined | R38C          | T1025S |             |       |        |        |
| TCGA-AX-A1C5-01   | Uterine combined | H1047Y        | V344M  |             |       |        |        |
| TCGA-AX-A1CE-01   | Uterine combined | R88Q          | D350G  | R818H       | L929M | P953S  | A1020T |
| TCGA-AX-A2HC-01   | Uterine combined | R88Q          | R832*  | X555_splice |       |        |        |
| TCGA-AX-A2HD-01   | Uterine combined | E418K         | R93Q   | E600K       |       |        |        |
| TCGA-AX-A2HG-01   | Uterine combined | E542K         | R310C  |             |       |        |        |
| TCGA-AX-A2IN-01   | Uterine combined | N345T         | R38C   |             |       |        |        |
| TCGA-B5-A0JU-01   | Uterine combined | E545A         | H1047Y |             |       |        |        |
| TCGA-B5-A0JY-01   | Uterine combined | G12D          | P449L  | E522A       |       |        |        |
| TCGA-B5-A0K2-01   | Uterine combined | R93W          | C378R  |             |       |        |        |
| TCGA-B5-A111-01   | Uterine combined | R93Q          | M1004I |             |       |        |        |
| TCGA-B5-A11R-01   | Uterine combined | E39K          | N1044K |             |       |        |        |
| TCGA-B5-A11S-01   | Uterine combined | M1043V        | G1007R |             |       |        |        |
| TCGA-B5-A11X-01   | Uterine combined | G118D         | E39K   |             |       |        |        |
| TCGA-B5-A11Y-01   | Uterine combined | V344M         | H1047Q | R93Q        |       |        |        |
| TCGA-B5-A3FA-01   | Uterine combined | R88Q          | Y1021H | R401Q       |       |        |        |
| TCGA-B5-A3FC-01   | Uterine combined | Y1021C        | R108C  |             |       |        |        |
| TCGA-BG-A0M0-01   | Uterine combined | P471L         | E365K  |             |       |        |        |
| TCGA-BG-A0MQ-01   | Uterine combined | Y1021C        | R93Q   |             |       |        |        |
| TCGA-BG-A0VX-01   | Uterine combined | R88Q          | Q546P  |             |       |        |        |
| TCGA-BG-A0VZ-01   | Uterine combined | K111N         | N1044K |             |       |        |        |
| TCGA-BG-A187-01   | Uterine combined | C420R         | R93Q   |             |       |        |        |
| TCGA-BK-A0C9-01   | Uterine combined | E453Q         | E542Q  |             |       |        |        |
| TCGA-BK-A56F-01   | Uterine combined | FNDC3B-PIK3CA | H1047R | P539R       |       |        |        |
| TCGA-BS-A0TC-01   | Uterine combined | R108H         | R38C   |             |       |        |        |
| TCGA-BS-A0UF-01   | Uterine combined | R401Q         | Q643H  | F1016C      |       |        |        |
| TCGA-BS-A0UJ-01   | Uterine combined | Q546P         | W479*  |             |       |        |        |
| TCGA-BS-A0UV-01   | Uterine combined | R88Q          | R1023* |             |       |        |        |
| TCGA-BS-A0V6-01   | Uterine combined | K111E         | D939G  |             |       |        |        |
| TCGA-BS-A0V7-01   | Uterine combined | H1047L        | N345K  |             |       |        |        |
| TCGA-D1-A103-01   | Uterine combined | E39K          | R617W  |             |       |        |        |
| TCGA-D1-A16R-01   | Uterine combined | R88Q          | C901F  |             |       |        |        |
| TCGA-D1-A16Y-01   | Uterine combined | R88Q          | E81K   |             |       |        |        |
| TCGA-D1-A17F-01   | Uterine combined | G118D         | D725N  |             |       |        |        |
| TCGA-D1-A17T-01   | Uterine combined | R88Q          | C901F  |             |       |        |        |
| TCGA-D1-A1O5-01   | Uterine combined | Q546P         | E542A  |             |       |        |        |
| TCGA-D1-A1O7-01   | Uterine combined | R88Q          | M1004V |             |       |        |        |
| TCGA-DF-A2KN-01   | Uterine combined | C378F         | R617Q  | R992*       |       |        |        |
| TCGA-DF-A2KU-01   | Uterine combined | R88Q          | E365K  | Y392H       |       |        |        |
| TCGA-DF-A2KV-01   | Uterine combined | T1025A        | R93W   |             |       |        |        |
| TCGA-E6-A1LX-01   | Uterine combined | R88Q          | C378Y  | L339I       | P266T |        | F930V  |
| TCGA-EO-A22R-01   | Uterine combined | R88Q          | G106V  | R19I        |       |        |        |
| TCGA-EO-A22U-01   | Uterine combined | E365K         | R93W   | I351T       |       |        |        |
| TCGA-EO-A22X-01   | Uterine combined | R88Q          | R357Q  | M282V       |       | L1006R |        |
| TCGA-EO-A3AV-01   | Uterine combined | E81K          | M1004R |             |       |        |        |
| TCGA-EO-A3B0-01   | Uterine combined | D350N         | R38C   | R770Q       |       |        |        |
| TCGA-EO-A3KX-01   | Uterine combined | R108H         | N1044I |             |       |        |        |
| TCGA-EY-A1GL-01   | Uterine combined | E726K         | K111N  |             |       |        |        |
| TCGA-EY-A1GU-01   | Uterine combined | R38H          | G118D  |             |       |        |        |
| TCGA-EY-A1H0-01   | Uterine combined | R38C          | E542Q  | M282V       |       |        |        |
| TCGA-EY-A2OM-01   | Uterine combined | R88Q          | R108H  |             |       |        |        |
| TCGA-FI-A2D5-01   | Uterine combined | R88Q          | M1004I | T322A       |       |        |        |
| TCGA-PG-A916-01   | Uterine combined | G118D         | N345I  |             |       |        |        |
| P-0001821-T01-IM3 | Uterine combined | R88Q          | Q546H  |             |       |        |        |
| P-0004017-T01-IM5 | Uterine combined | H1047L        | E453K  |             |       |        |        |
| TCGA-DI-A1BU-01   | Uterine combined | E110del       | G106D  | Y165H       |       | I406V  |        |
| TCGA-E6-A2P8-01   | Uterine combined | R88Q          | A1066V |             |       |        |        |
| TCGA-EO-A3AZ-01   | Uterine combined | E453del       | R108H  | E545Q       |       | Q958R  |        |
| TCGA-QF-A5YS-01   | Uterine combined | R88Q          | T1025A | M1055I      |       |        |        |
| P-0002945-T01-IM3 | Uterine combined | H1047Y        | E726K  |             |       |        |        |
| TCGA-A5-A0G2-01   | Uterine combined | L569I         | R852Q  | G903E       |       |        |        |
| TCGA-A5-A0R6-01   | Uterine combined | M1043V        | C378Y  |             |       |        |        |
| TCGA-E6-A1LZ-01   | Uterine combined | E545K         | R992P  | E453Q       |       |        |        |

**Table S2: List of multiple *PIK3CA* mutant tumours (n=451) (MSK-IMPACT)**

| <b>Sample ID</b>  | <b>Cancer Type</b> | <b><i>PIK3CA</i> Mutation</b> |
|-------------------|--------------------|-------------------------------|
| P-0006682-T02-IM6 | Anal Cancer        | E545K,R108H                   |
| P-0018953-T01-IM6 | Anal Cancer        | M1043I,K111N                  |
| P-0020781-T01-IM6 | Anal Cancer        | E545K,R93W                    |
| P-0031461-T01-IM6 | Anal Cancer        | E545K,E726K                   |
| P-0000043-T02-IM3 | Bladder Cancer     | E545K,V356A                   |
| P-0002659-T01-IM3 | Bladder Cancer     | E545K,Q682H                   |
| P-0009101-T01-IM5 | Bladder Cancer     | E545K,E542K                   |
| P-0000423-T01-IM3 | Bladder Cancer     | E545K,E453Q                   |
| P-0003433-T01-IM5 | Bladder Cancer     | E542K,E453K                   |
| P-0004330-T01-IM5 | Bladder Cancer     | R93Q,R310C                    |
| P-0004424-T01-IM5 | Bladder Cancer     | H1047R,E542K                  |
| P-0004688-T01-IM5 | Bladder Cancer     | R108H,T322I,G1007D            |
| P-0010803-T01-IM5 | Bladder Cancer     | H1047Y,E542V                  |
| P-0010921-T01-IM5 | Bladder Cancer     | E542K,H1065Y,E453Q            |
| P-0014909-T01-IM6 | Bladder Cancer     | E542K,E726K                   |
| P-0015886-T01-IM6 | Bladder Cancer     | E726K,E503K                   |
| P-0017472-T01-IM6 | Bladder Cancer     | Q75E,A1066V                   |
| P-0019005-T01-IM6 | Bladder Cancer     | E545K,E542K                   |
| P-0024039-T01-IM6 | Bladder Cancer     | E545K,E542K                   |
| P-0031416-T01-IM6 | Bladder Cancer     | N345K,E978K                   |
| P-0031860-T01-IM6 | Bladder Cancer     | E545K,D133Y                   |
| P-0032134-T01-IM6 | Bladder Cancer     | E545K,R88Q,E453Q,E418K        |
| P-0000138-T01-IM3 | Breast Cancer      | E542K,E453K                   |
| P-0000155-T01-IM3 | Breast Cancer      | H1047R,D350N                  |
| P-0000167-T01-IM3 | Breast Cancer      | K111E,E418K                   |
| P-0000167-T02-IM3 | Breast Cancer      | E542K,K111E                   |
| P-0000234-T01-IM3 | Breast Cancer      | E542K,M1043I                  |
| P-0000397-T01-IM3 | Breast Cancer      | E542K,E453K                   |
| P-0000607-T01-IM3 | Breast Cancer      | H1047L,E545Q                  |
| P-0001114-T02-IM3 | Breast Cancer      | E545K,E453Q,E978Q             |
| P-0001351-T01-IM3 | Breast Cancer      | E545K,E726K                   |
| P-0001902-T01-IM3 | Breast Cancer      | E542K,E545D                   |
| P-0001990-T01-IM3 | Breast Cancer      | N345K,H1047Y                  |
| P-0002124-T01-IM3 | Breast Cancer      | H1047R,E365K                  |
| P-0002562-T01-IM3 | Breast Cancer      | E545K,E453Q                   |
| P-0002667-T01-IM3 | Breast Cancer      | H1047R,N107I                  |
| P-0002841-T01-IM3 | Breast Cancer      | H1047R,K111N                  |
| P-0002922-T01-IM3 | Breast Cancer      | H1047R,E545Q                  |
| P-0003224-T01-IM5 | Breast Cancer      | H1047R,G106V                  |
| P-0003233-T03-IM6 | Breast Cancer      | E542K,E453K                   |
| P-0003882-T03-IM6 | Breast Cancer      | N345K,E726K                   |
| P-0003987-T01-IM5 | Breast Cancer      | E545K,H1047R                  |
| P-0004187-T01-IM5 | Breast Cancer      | H1047R,E970K                  |
| P-0004264-T01-IM5 | Breast Cancer      | H1047R,E726K                  |

|                   |               |                                      |
|-------------------|---------------|--------------------------------------|
| P-0004433-T01-IM5 | Breast Cancer | E545K,L252F                          |
| P-0005032-T01-IM5 | Breast Cancer | L455Wfs*6,L452Qfs*5                  |
| P-0005037-T01-IM5 | Breast Cancer | N345K,R93Q                           |
| P-0005154-T01-IM5 | Breast Cancer | H1047R,E542K                         |
| P-0005220-T01-IM5 | Breast Cancer | H1047R,C407F                         |
| P-0005242-T01-IM5 | Breast Cancer | E545K,E726K                          |
| P-0005818-T01-IM5 | Breast Cancer | H1047R,G118D                         |
| P-0006161-T03-IM5 | Breast Cancer | E542K,E453K                          |
| P-0006166-T01-IM5 | Breast Cancer | E542K,E726K                          |
| P-0006335-T01-IM5 | Breast Cancer | E545K,T1025A                         |
| P-0006660-T01-IM5 | Breast Cancer | R88Q,Q546H                           |
| P-0006723-T01-IM5 | Breast Cancer | H1047R,E81K                          |
| P-0006780-T01-IM5 | Breast Cancer | V344M,E726K                          |
| P-0006787-T01-IM5 | Breast Cancer | H1047R,E726K                         |
| P-0007396-T01-IM5 | Breast Cancer | N345K,E970K                          |
| P-0009364-T02-IM6 | Breast Cancer | E545K,H1047R                         |
| P-0010043-T01-IM5 | Breast Cancer | H1047R,P539R                         |
| P-0010703-T01-IM5 | Breast Cancer | H1047L,E726K                         |
| P-0010917-T01-IM5 | Breast Cancer | E542K,E726K                          |
| P-0011305-T01-IM5 | Breast Cancer | E545K,E726K                          |
| P-0011420-T01-IM5 | Breast Cancer | E545K,A1066V                         |
| P-0012667-T01-IM5 | Breast Cancer | D390N,E385K                          |
| P-0013491-T01-IM5 | Breast Cancer | G118D,E542Q                          |
| P-0013771-T01-IM5 | Breast Cancer | H1047R,E726K                         |
| P-0013895-T01-IM5 | Breast Cancer | E542K,E726K                          |
| P-0014091-T01-IM5 | Breast Cancer | E81K,H1047L                          |
| P-0014136-T01-IM5 | Breast Cancer | E542K,N457K                          |
| P-0014362-T01-IM6 | Breast Cancer | H1047R,N370K                         |
| P-0014656-T01-IM6 | Breast Cancer | E542K,K240Q                          |
| P-0015097-T01-IM6 | Breast Cancer | H1047R,E453K                         |
| P-0015379-T01-IM6 | Breast Cancer | H419_P421delinsQ,M1043_N1044delinsVK |
| P-0015499-T01-IM6 | Breast Cancer | H1047R,E418K                         |
| P-0015944-T01-IM6 | Breast Cancer | C420R,E726K                          |
| P-0015964-T01-IM6 | Breast Cancer | E545K,M1004I                         |
| P-0016473-T01-IM6 | Breast Cancer | E545K,L239R                          |
| P-0016686-T01-IM6 | Breast Cancer | H1047R,P539R                         |
| P-0017015-T01-IM6 | Breast Cancer | N345K,E726K                          |
| P-0017042-T01-IM6 | Breast Cancer | E545K,M1043I                         |
| P-0017422-T01-IM6 | Breast Cancer | E542K,A1066L                         |
| P-0018661-T01-IM6 | Breast Cancer | E453K,G451K                          |
| P-0019024-T01-IM6 | Breast Cancer | E545K,L10_P18del                     |
| P-0019040-T01-IM6 | Breast Cancer | H1047R,R93Q,E418K                    |
| P-0019103-T01-IM6 | Breast Cancer | H1047R,L456R                         |
| P-0019118-T01-IM6 | Breast Cancer | E542K,E453K                          |
| P-0019425-T01-IM6 | Breast Cancer | H1047R,C257Y                         |
| P-0019458-T01-IM6 | Breast Cancer | H1047R,E726K                         |
| P-0020188-T01-IM6 | Breast Cancer | E542K,E726K                          |



|                   |               |                        |
|-------------------|---------------|------------------------|
| P-0020301-T01-IM6 | Breast Cancer | E453K,H419_P421delinsQ |
| P-0021148-T01-IM6 | Breast Cancer | H1047R,V344M           |
| P-0021480-T01-IM6 | Breast Cancer | H1047R,E81K            |
| P-0021571-T01-IM6 | Breast Cancer | H1047R,R88Q            |
| P-0021751-T01-IM6 | Breast Cancer | Q546R,E453K            |
| P-0021895-T01-IM6 | Breast Cancer | H1047R,E726K           |
| P-0022762-T01-IM6 | Breast Cancer | H1047R,G451V           |
| P-0023508-T01-IM6 | Breast Cancer | E545K,K228N            |
| P-0023835-T01-IM6 | Breast Cancer | H1047R,E722K           |
| P-0024230-T01-IM6 | Breast Cancer | K111E,E545V            |
| P-0024231-T01-IM6 | Breast Cancer | Q546R,E453_L455del     |
| P-0024285-T01-IM6 | Breast Cancer | E545K,E726K            |
| P-0024507-T01-IM6 | Breast Cancer | E545K,H1047R           |
| P-0025307-T01-IM6 | Breast Cancer | E110del,E453K          |
| P-0025489-T01-IM6 | Breast Cancer | E542K,E726K            |
| P-0025528-T01-IM6 | Breast Cancer | H1047R,Q546H           |
| P-0026513-T01-IM6 | Breast Cancer | E542K,G118D            |
| P-0026885-T01-IM6 | Breast Cancer | H1047R,M1004I,E722K    |
| P-0027710-T01-IM6 | Breast Cancer | E110del,P539R          |
| P-0028309-T01-IM6 | Breast Cancer | H1047R,E39Q            |
| P-0028907-T01-IM6 | Breast Cancer | N345K,E726K            |
| P-0028960-T01-IM6 | Breast Cancer | G118D,E982D            |
| P-0029802-T01-IM6 | Breast Cancer | E545K,E542K            |
| P-0030451-T01-IM6 | Breast Cancer | H1047R,R88Q            |
| P-0031280-T01-IM6 | Breast Cancer | E545K,V344M            |
| P-0031695-T01-IM6 | Breast Cancer | E542K,M1043I           |
| P-0031839-T01-IM6 | Breast Cancer | E545K,M1004I           |
| P-0000107-T01-IM3 | Breast Cancer | Y1021H,D1017E,I1019V   |
| P-0000207-T01-IM3 | Breast Cancer | N345K,K111E            |
| P-0000356-T01-IM3 | Breast Cancer | H1047R,E453K           |
| P-0000381-T01-IM3 | Breast Cancer | H1047R,E726K           |
| P-0000592-T01-IM3 | Breast Cancer | E545K,M1043I           |
| P-0001043-T01-IM3 | Breast Cancer | H1047R,R93L            |
| P-0001631-T01-IM3 | Breast Cancer | E545K,M1043L           |
| P-0002657-T01-IM3 | Breast Cancer | G118D,G364R            |
| P-0002756-T02-IM5 | Breast Cancer | E545K,E453Q            |
| P-0004194-T01-IM5 | Breast Cancer | E545K,D725G            |
| P-0004196-T01-IM5 | Breast Cancer | H1047R,Q958K           |
| P-0004913-T01-IM5 | Breast Cancer | H1047R,E542A           |
| P-0005120-T01-IM5 | Breast Cancer | E542K,E726K            |
| P-0005314-T01-IM5 | Breast Cancer | E542K,E726K            |
| P-0005611-T01-IM5 | Breast Cancer | E39K,M1043I            |
| P-0005968-T01-IM5 | Breast Cancer | H1047R,R88Q            |
| P-0008679-T01-IM5 | Breast Cancer | H1047R,N345I           |
| P-0008694-T01-IM5 | Breast Cancer | E542K,E453K            |
| P-0008845-T01-IM5 | Breast Cancer | G118D,K111E            |
| P-0009745-T02-IM6 | Breast Cancer | C420R,E726K            |

|                   |               |                           |
|-------------------|---------------|---------------------------|
| P-0010002-T01-IM5 | Breast Cancer | G1049R,Q546P              |
| P-0011355-T01-IM5 | Breast Cancer | H1047R,E81K               |
| P-0012635-T02-IM6 | Breast Cancer | H1047R,P539R              |
| P-0012911-T01-IM5 | Breast Cancer | C420R,R108H               |
| P-0014278-T01-IM6 | Breast Cancer | E542K,E726K               |
| P-0014479-T01-IM6 | Breast Cancer | E545K,E542Q               |
| P-0014480-T01-IM6 | Breast Cancer | E542K,E726K               |
| P-0014515-T01-IM6 | Breast Cancer | Q546R,M1004I              |
| P-0014622-T01-IM6 | Breast Cancer | H1047R,P104L              |
| P-0014737-T01-IM6 | Breast Cancer | H1047L,P539R              |
| P-0014860-T01-IM6 | Breast Cancer | H1047L,E545D              |
| P-0014940-T01-IM6 | Breast Cancer | E542K,E726K               |
| P-0014943-T01-IM6 | Breast Cancer | H1047R,E542G              |
| P-0015005-T01-IM6 | Breast Cancer | E545K,Q546R               |
| P-0015633-T01-IM6 | Breast Cancer | H1047L,I112F              |
| P-0015640-T01-IM6 | Breast Cancer | N1044K,D350N              |
| P-0016041-T02-IM6 | Breast Cancer | R88Q,H1047L               |
| P-0016773-T01-IM6 | Breast Cancer | G106V,Q546H               |
| P-0016786-T01-IM6 | Breast Cancer | E545K,M1043I              |
| P-0016802-T01-IM6 | Breast Cancer | H1047R,G118D              |
| P-0016840-T01-IM6 | Breast Cancer | H1047R,V344M              |
| P-0017581-T01-IM5 | Breast Cancer | E545G,T1025A              |
| P-0017818-T01-IM6 | Breast Cancer | E545K,H1048R              |
| P-0018891-T01-IM6 | Breast Cancer | H1047R,N107Y              |
| P-0019133-T01-IM6 | Breast Cancer | G1049R,P539R              |
| P-0019191-T01-IM6 | Breast Cancer | H1047R,E542K              |
| P-0019808-T01-IM6 | Breast Cancer | H1047R,R108H              |
| P-0019935-T01-IM6 | Breast Cancer | H1047R,E970K              |
| P-0020020-T01-IM6 | Breast Cancer | D549N,*1fs*               |
| P-0020043-T01-IM6 | Breast Cancer | D725N,H450_P458del        |
| P-0020049-T01-IM6 | Breast Cancer | E545K,H1047R              |
| P-0020551-T02-IM6 | Breast Cancer | E545K,E726K               |
| P-0020645-T01-IM6 | Breast Cancer | H1047R,M1043V             |
| P-0021040-T01-IM6 | Breast Cancer | H1047R,M1055L             |
| P-0021087-T01-IM6 | Breast Cancer | E542K,T544S               |
| P-0021129-T01-IM6 | Breast Cancer | H1047R,E726K              |
| P-0021135-T02-IM6 | Breast Cancer | H1047R,E542Q              |
| P-0021201-T01-IM6 | Breast Cancer | N345I,M1040T,L1036S       |
| P-0021218-T01-IM6 | Breast Cancer | H1047R,E418K              |
| P-0021660-T01-IM6 | Breast Cancer | E545K,E542K               |
| P-0022021-T01-IM6 | Breast Cancer | E545K,N1044K,D549H        |
| P-0022048-T01-IM6 | Breast Cancer | N345K,M1043_N1044delinsIH |
| P-0022088-T01-IM6 | Breast Cancer | E545K,H1047R              |
| P-0022158-T01-IM6 | Breast Cancer | P471L,H1047C              |
| P-0022167-T01-IM6 | Breast Cancer | G1049R,R93Q,P539R         |
| P-0022565-T01-IM6 | Breast Cancer | H1047R,C378F              |
| P-0022750-T01-IM6 | Breast Cancer | H1047R,E542K              |

|                   |                           |                              |
|-------------------|---------------------------|------------------------------|
| P-0023131-T01-IM6 | Breast Cancer             | H1047R,C420R                 |
| P-0023919-T02-IM6 | Breast Cancer             | H1047R,C378Y                 |
| P-0024141-T01-IM6 | Breast Cancer             | E542K,E726K                  |
| P-0024364-T01-IM6 | Breast Cancer             | H1047R,P449A                 |
| P-0024420-T01-IM6 | Breast Cancer             | E545K,D939G,D549N            |
| P-0024647-T01-IM6 | Breast Cancer             | H1047R,R88Q                  |
| P-0025190-T01-IM6 | Breast Cancer             | E542K,E726K                  |
| P-0026012-T01-IM6 | Breast Cancer             | E545K,H1047L                 |
| P-0026070-T01-IM6 | Breast Cancer             | E545K,G903A                  |
| P-0026484-T01-IM6 | Breast Cancer             | I31M,I112T                   |
| P-0026829-T01-IM6 | Breast Cancer             | E542K,R93W                   |
| P-0026957-T01-IM6 | Breast Cancer             | H1047R,D350G                 |
| P-0028922-T01-IM6 | Breast Cancer             | G1049R,P104T                 |
| P-0029706-T01-IM6 | Breast Cancer             | H1047R,C378Y                 |
| P-0029966-T01-IM6 | Breast Cancer             | E545K,N1044K                 |
| P-0030165-T01-IM6 | Breast Cancer             | N345K,E418K                  |
| P-0030169-T01-IM6 | Breast Cancer             | R108H,H1047Q                 |
| P-0030392-T01-IM6 | Breast Cancer             | E545K,E453K                  |
| P-0030977-T01-IM6 | Breast Cancer             | H1047R,R108C                 |
| P-0031023-T01-IM6 | Breast Cancer             | H1047R,R88Q                  |
| P-0031133-T01-IM6 | Breast Cancer             | H1047R,S323F                 |
| P-0032388-T01-IM6 | Breast Cancer             | E542K,E418K                  |
| P-0004374-T01-IM5 | Cancer of Unknown Primary | E542K,D454G                  |
| P-0008153-T01-IM5 | Cancer of Unknown Primary | H1047R,R88Q                  |
| P-0022966-T01-IM6 | Cancer of Unknown Primary | M1043I,I932M                 |
| P-0023748-T01-IM6 | Cancer of Unknown Primary | E545K,H1047R                 |
| P-0026350-T01-IM6 | Cancer of Unknown Primary | R108_E109del,X353_splice     |
| P-0028427-T01-IM6 | Cancer of Unknown Primary | R357Q,K111N,R537Q,L62I,V146A |
| P-0010527-T01-IM5 | Cervical Cancer           | E545K,E542K                  |
| P-0013774-T01-IM5 | Cervical Cancer           | E545K,E81K                   |
| P-0015136-T01-IM6 | Cervical Cancer           | C420R,N370K                  |
| P-0029938-T01-IM6 | Cervical Cancer           | E545K,E453K                  |
| P-0030876-T01-IM6 | Cervical Cancer           | E545K,E726K                  |
| P-0033211-T01-IM6 | Cervical Cancer           | K111N,Q546L                  |
| P-0001215-T01-IM3 | Colorectal Cancer         | E365K,R992*,I816N            |
| P-0001732-T01-IM3 | Colorectal Cancer         | E542K,M1043I                 |
| P-0011071-T01-IM5 | Colorectal Cancer         | E542K,R108S                  |
| P-0019593-T01-IM6 | Colorectal Cancer         | E542K,E453K                  |
| P-0020473-T01-IM6 | Colorectal Cancer         | R88Q,I816S                   |
| P-0020493-T01-IM6 | Colorectal Cancer         | H1047R,R93W                  |
| P-0022090-T01-IM6 | Colorectal Cancer         | H1047R,Y343F                 |
| P-0023461-T01-IM6 | Colorectal Cancer         | E545K,G106V                  |
| P-0026678-T01-IM6 | Colorectal Cancer         | R38C,Y1021C                  |
| P-0000788-T01-IM3 | Colorectal Cancer         | E542K,M1010I                 |
| P-0001289-T01-IM3 | Colorectal Cancer         | H1047R,V344G                 |
| P-0001940-T01-IM3 | Colorectal Cancer         | H1047R,G118D                 |
| P-0002413-T01-IM3 | Colorectal Cancer         | Q546K,E726K                  |

|                   |                    |                        |
|-------------------|--------------------|------------------------|
| P-0003513-T01-IM5 | Colorectal Cancer  | E365K,H1047Q           |
| P-0003720-T01-IM5 | Colorectal Cancer  | H1047R,R93Q            |
| P-0004566-T01-IM5 | Colorectal Cancer  | E545K,H1047R           |
| P-0004865-T01-IM5 | Colorectal Cancer  | E542K,K111N            |
| P-0004928-T01-IM5 | Colorectal Cancer  | E545K,E542K            |
| P-0005270-T02-IM6 | Colorectal Cancer  | H1065Y,E39D            |
| P-0006170-T01-IM5 | Colorectal Cancer  | E545G,Q75H             |
| P-0006581-T01-IM5 | Colorectal Cancer  | E545K,L540F            |
| P-0006612-T01-IM5 | Colorectal Cancer  | M1043I,R693C           |
| P-0007147-T01-IM5 | Colorectal Cancer  | H1047R,R88Q            |
| P-0007272-T01-IM5 | Colorectal Cancer  | R38C,R357L             |
| P-0007836-T01-IM5 | Colorectal Cancer  | E110del,R93Q,E418D     |
| P-0008721-T01-IM5 | Colorectal Cancer  | H1047R,A289T           |
| P-0010125-T01-IM5 | Colorectal Cancer  | G364R,V125E            |
| P-0010167-T01-IM5 | Colorectal Cancer  | H1047R,V851A           |
| P-0011357-T01-IM5 | Colorectal Cancer  | M1004I,K111N,R357*     |
| P-0013010-T01-IM5 | Colorectal Cancer  | H1047R,C420R           |
| P-0013020-T01-IM5 | Colorectal Cancer  | H1047R,Q546R           |
| P-0016066-T01-IM6 | Colorectal Cancer  | H1047R,K111E           |
| P-0016314-T01-IM6 | Colorectal Cancer  | H1047R,C420R           |
| P-0017583-T01-IM5 | Colorectal Cancer  | Y1021C,H1047Q          |
| P-0017995-T01-IM6 | Colorectal Cancer  | Y1021H,R93W            |
| P-0018437-T01-IM6 | Colorectal Cancer  | C420R,H1047Y           |
| P-0019464-T01-IM6 | Colorectal Cancer  | N345K,H1047Y           |
| P-0020144-T01-IM6 | Colorectal Cancer  | R38C,Y1021H            |
| P-0020383-T01-IM6 | Colorectal Cancer  | R108H,N345I            |
| P-0020689-T01-IM6 | Colorectal Cancer  | R88Q,R108H             |
| P-0022477-T01-IM6 | Colorectal Cancer  | H1047R,K111N           |
| P-0023187-T01-IM6 | Colorectal Cancer  | D350N,K111N            |
| P-0023271-T01-IM6 | Colorectal Cancer  | R88Q,L339F,L144M       |
| P-0025047-T01-IM6 | Colorectal Cancer  | H1047R,K111E           |
| P-0025073-T01-IM6 | Colorectal Cancer  | E545K,H1047R           |
| P-0025348-T01-IM6 | Colorectal Cancer  | H1047R,P449S           |
| P-0025695-T01-IM6 | Colorectal Cancer  | E545K,E545G            |
| P-0025715-T01-IM6 | Colorectal Cancer  | H1047R,G914R           |
| P-0025792-T01-IM6 | Colorectal Cancer  | E542K,L540_S541dup     |
| P-0026962-T01-IM6 | Colorectal Cancer  | E542K,H1048R,V491Dfs*2 |
| P-0027476-T01-IM6 | Colorectal Cancer  | H1047R,R88Q,P539R      |
| P-0027608-T01-IM6 | Colorectal Cancer  | E542K,R93Q             |
| P-0030265-T01-IM6 | Colorectal Cancer  | R93Q,T1025I            |
| P-0030988-T01-IM6 | Colorectal Cancer  | H1047R,R412*           |
| P-0032698-T01-IM6 | Colorectal Cancer  | H1047R,R1023Q          |
| P-0033100-T01-IM6 | Colorectal Cancer  | H1047R,R88Q,P266H      |
| P-0033196-T01-IM6 | Colorectal Cancer  | E545K,C420R            |
| P-0000404-T01-IM3 | Endometrial Cancer | K111E,P449R            |
| P-0000448-T01-IM3 | Endometrial Cancer | V344M,T1025A           |
| P-0003767-T01-IM5 | Endometrial Cancer | H1047R,E453del         |

|                   |                    |                         |
|-------------------|--------------------|-------------------------|
| P-0004136-T01-IM5 | Endometrial Cancer | E542K,I1058L            |
| P-0006269-T01-IM5 | Endometrial Cancer | V344M,H1047Y            |
| P-0012152-T01-IM5 | Endometrial Cancer | E545G,P97H              |
| P-0012358-T01-IM5 | Endometrial Cancer | R88Q,R115Q,R537Q,L997I  |
| P-0014720-T01-IM6 | Endometrial Cancer | G118D,E110del           |
| P-0018542-T01-IM6 | Endometrial Cancer | G118D,T957I             |
| P-0019471-T01-IM6 | Endometrial Cancer | P104L,M1043I            |
| P-0024756-T01-IM6 | Endometrial Cancer | H1047R,R108H            |
| P-0025003-T01-IM6 | Endometrial Cancer | R88Q,E453G              |
| P-0025812-T01-IM6 | Endometrial Cancer | M1043V,P539R            |
| P-0026297-T01-IM6 | Endometrial Cancer | R88Q,D350G,R230*        |
| P-0027698-T01-IM6 | Endometrial Cancer | H1047R,Y1021H           |
| P-0028924-T01-IM6 | Endometrial Cancer | V344M,M1043I            |
| P-0029337-T01-IM6 | Endometrial Cancer | V346E,D743V             |
| P-0029683-T01-IM6 | Endometrial Cancer | H1047Q,F477S            |
| P-0031387-T01-IM6 | Endometrial Cancer | V344M,N1044S,E418K      |
| P-0031615-T01-IM6 | Endometrial Cancer | H1047R,M1043I           |
| P-0002357-T01-IM3 | Endometrial Cancer | H1047Y,D1029H           |
| P-0002945-T01-IM3 | Endometrial Cancer | H1047Y,E726K            |
| P-0004017-T01-IM5 | Endometrial Cancer | H1047L,E453K            |
| P-0004255-T01-IM5 | Endometrial Cancer | H1047R,R88Q             |
| P-0006201-T01-IM5 | Endometrial Cancer | E365K,R93W              |
| P-0009316-T01-IM5 | Endometrial Cancer | E545K,H1047Y            |
| P-0010967-T01-IM5 | Endometrial Cancer | E81K,R88Q               |
| P-0011569-T01-IM5 | Endometrial Cancer | R88Q,Y1021C,R93Q,L779M  |
| P-0011570-T01-IM5 | Endometrial Cancer | L339I,D549N,F83S        |
| P-0012113-T01-IM5 | Endometrial Cancer | R88Q,T1025A,Q958R       |
| P-0012397-T01-IM5 | Endometrial Cancer | R88Q,Y1021C,R852Q       |
| P-0012445-T01-IM5 | Endometrial Cancer | Y1021C,R992*            |
| P-0012670-T01-IM5 | Endometrial Cancer | R88Q,Y1021C             |
| P-0012726-T01-IM5 | Endometrial Cancer | R88Q,G106V              |
| P-0012755-T01-IM5 | Endometrial Cancer | C420R,R108H             |
| P-0012819-T01-IM5 | Endometrial Cancer | R38C,L712I              |
| P-0012881-T01-IM5 | Endometrial Cancer | I816S,R19I              |
| P-0013452-T01-IM5 | Endometrial Cancer | R93W,C378R              |
| P-0013512-T01-IM5 | Endometrial Cancer | R88Q,G118D,G106D        |
| P-0014388-T01-IM6 | Endometrial Cancer | R88Q,R93W               |
| P-0014461-T01-IM6 | Endometrial Cancer | W11R,L1036S             |
| P-0014495-T01-IM6 | Endometrial Cancer | R88Q,Q546R              |
| P-0014528-T01-IM6 | Endometrial Cancer | R88Q,Y1021C             |
| P-0014780-T01-IM6 | Endometrial Cancer | H1047R,R88Q,V344A,R852Q |
| P-0015626-T01-IM6 | Endometrial Cancer | R88Q,R357Q              |
| P-0015869-T01-IM6 | Endometrial Cancer | R357Q,K111N,D883G       |
| P-0015885-T01-IM6 | Endometrial Cancer | C420R,Y1021C            |
| P-0015986-T01-IM6 | Endometrial Cancer | G118D,H1048R            |
| P-0016099-T01-IM6 | Endometrial Cancer | E365K,F1002V            |
| P-0016203-T01-IM6 | Endometrial Cancer | V344M,R88Q              |

|                   |                    |                          |
|-------------------|--------------------|--------------------------|
| P-0016247-T01-IM6 | Endometrial Cancer | H1047R,N345D             |
| P-0016537-T01-IM6 | Endometrial Cancer | E545K,H1047L             |
| P-0016556-T01-IM6 | Endometrial Cancer | C901F,R88Q               |
| P-0016904-T01-IM6 | Endometrial Cancer | R88Q,N345K,R93W          |
| P-0016907-T01-IM6 | Endometrial Cancer | P366R,H1047Y             |
| P-0017302-T01-IM6 | Endometrial Cancer | Y1021H,K111E             |
| P-0017424-T01-IM6 | Endometrial Cancer | E545K,R88Q               |
| P-0017681-T01-IM6 | Endometrial Cancer | R88Q,R108H,V344A         |
| P-0017896-T01-IM6 | Endometrial Cancer | E545K,E542K              |
| P-0018005-T01-IM6 | Endometrial Cancer | E545K,R274T,L285F        |
| P-0018009-T01-IM6 | Endometrial Cancer | E81K,E453K               |
| P-0018459-T01-IM6 | Endometrial Cancer | H1047L,V101del           |
| P-0018616-T01-IM6 | Endometrial Cancer | R108C,D743N              |
| P-0018778-T01-IM6 | Endometrial Cancer | R115P,P539R              |
| P-0018781-T01-IM6 | Endometrial Cancer | R88Q,P449S               |
| P-0018790-T01-IM6 | Endometrial Cancer | H1047R,R108H             |
| P-0019107-T01-IM6 | Endometrial Cancer | K111N,D350N              |
| P-0019658-T01-IM6 | Endometrial Cancer | R88Q,R357Q               |
| P-0019659-T01-IM6 | Endometrial Cancer | R88Q,R108S               |
| P-0019741-T01-IM6 | Endometrial Cancer | R88Q,H1047Y              |
| P-0019871-T01-IM6 | Endometrial Cancer | R88Q,F83I,P458L          |
| P-0019986-T01-IM6 | Endometrial Cancer | R88Q,R108C               |
| P-0020227-T01-IM6 | Endometrial Cancer | R38H,R38C,E600K          |
| P-0020295-T01-IM6 | Endometrial Cancer | E81K,T1025A              |
| P-0020509-T01-IM6 | Endometrial Cancer | R38H,R108H               |
| P-0020556-T01-IM6 | Endometrial Cancer | E545K,R93Q               |
| P-0020757-T01-IM6 | Endometrial Cancer | K111E,P539R              |
| P-0021579-T01-IM6 | Endometrial Cancer | N1044K,N345H             |
| P-0021665-T01-IM6 | Endometrial Cancer | R38H,E453K               |
| P-0021777-T01-IM6 | Endometrial Cancer | R38C,R108H               |
| P-0022813-T01-IM6 | Endometrial Cancer | K111E,H450_I459delinsL   |
| P-0023250-T01-IM6 | Endometrial Cancer | H1047R,F83C              |
| P-0023555-T01-IM6 | Endometrial Cancer | H1047R,D350G,E453K       |
| P-0023857-T01-IM6 | Endometrial Cancer | H1047R,R88Q              |
| P-0023969-T01-IM6 | Endometrial Cancer | R88Q,K111E               |
| P-0025632-T01-IM6 | Endometrial Cancer | R88Q,R108H               |
| P-0025648-T01-IM6 | Endometrial Cancer | R88Q,R357Q               |
| P-0025662-T01-IM6 | Endometrial Cancer | N345T,E542G              |
| P-0026278-T01-IM6 | Endometrial Cancer | R88Q,Y1021C,G364R        |
| P-0026297-T02-IM6 | Endometrial Cancer | R88Q,D350G,R401Q,R230*   |
| P-0026714-T01-IM6 | Endometrial Cancer | G12D,L422W               |
| P-0027431-T01-IM6 | Endometrial Cancer | C420R,M1040K             |
| P-0027652-T01-IM6 | Endometrial Cancer | E542A,F744L              |
| P-0028610-T01-IM6 | Endometrial Cancer | E726K,P104L              |
| P-0028776-T01-IM6 | Endometrial Cancer | H1047R,R951C,L267M,E784D |
| P-0028970-T01-IM6 | Endometrial Cancer | R38H,C378R               |
| P-0029162-T01-IM6 | Endometrial Cancer | C378R,R4Q                |

|                   |                        |                                                 |
|-------------------|------------------------|-------------------------------------------------|
| P-0029274-T01-IM6 | Endometrial Cancer     | E542K,N107I                                     |
| P-0029666-T01-IM6 | Endometrial Cancer     | P366R,E726A                                     |
| P-0029690-T01-IM6 | Endometrial Cancer     | R38C,T1025A,L339I,K111N                         |
| P-0029778-T01-IM6 | Endometrial Cancer     | E81K,M1004I                                     |
| P-0030372-T01-IM6 | Endometrial Cancer     | R357Q,R992*,G1009E                              |
| P-0031042-T01-IM6 | Endometrial Cancer     | E110del,R93Q                                    |
| P-0031185-T02-IM6 | Endometrial Cancer     | E542K,R88Q                                      |
| P-0031195-T01-IM6 | Endometrial Cancer     | Q546R,D350G                                     |
| P-0031271-T01-IM6 | Endometrial Cancer     | H1047R,V344M                                    |
| P-0031332-T02-IM6 | Endometrial Cancer     | H1047Y,R93W                                     |
| P-0031501-T01-IM6 | Endometrial Cancer     | V344M,R88Q,H1047Y                               |
| P-0032113-T01-IM6 | Endometrial Cancer     | R88Q,Q981H                                      |
| P-0032496-T01-IM6 | Endometrial Cancer     | R88Q,R108H,R357Q                                |
| P-0032589-T01-IM6 | Endometrial Cancer     | R88Q,Y1021C,E365K,T544N                         |
| P-0032606-T01-IM6 | Endometrial Cancer     | C420R,I1058L                                    |
| P-0032818-T01-IM6 | Endometrial Cancer     | R88Q,P449S,R115Q                                |
| P-0033016-T01-IM6 | Endometrial Cancer     | T1025A,K111N                                    |
| P-0024054-T01-IM6 | Esophagogastric Cancer | E545K,M1004I                                    |
| P-0009918-T01-IM5 | Esophagogastric Cancer | H1047R,V344M,K111N                              |
| P-0031190-T01-IM6 | Esophagogastric Cancer | X765_splice,X806_splice,X889_splice,X928_splice |
| P-0000650-T01-IM3 | Germ Cell Tumor        | E542K,K724del                                   |
| P-0019519-T01-IM6 | Glioma                 | E542A,E722K                                     |
| P-0000500-T01-IM3 | Glioma                 | E545K,E542K                                     |
| P-0002633-T01-IM3 | Glioma                 | R88Q,Q546R                                      |
| P-0002695-T01-IM3 | Glioma                 | E545K,E116K                                     |
| P-0004531-T01-IM5 | Glioma                 | C420R,E545G                                     |
| P-0008649-T01-IM5 | Glioma                 | H1047R,L436_P449dup                             |
| P-0011521-T01-IM5 | Glioma                 | E542K,G106V                                     |
| P-0013293-T02-IM6 | Glioma                 | E545K,D300N                                     |
| P-0017482-T01-IM6 | Glioma                 | V71I,V448dup                                    |
| P-0017675-T01-IM5 | Glioma                 | V125L,D133N,X382_splice                         |
| P-0018691-T01-IM6 | Glioma                 | G914R,N345D                                     |
| P-0023123-T01-IM6 | Glioma                 | R93W,P2L,G411S                                  |
| P-0023566-T01-IM6 | Glioma                 | E545K,R93W                                      |
| P-0027147-T01-IM6 | Glioma                 | K111E,P539R                                     |
| P-0029104-T01-IM6 | Glioma                 | P200S,P57L                                      |
| P-0031276-T01-IM6 | Glioma                 | E542K,I543F                                     |
| P-0032337-T01-IM6 | Glioma                 | Q546K,M1043V                                    |
| P-0005212-T01-IM5 | Head and Neck Cancer   | E542K,E78K                                      |
| P-0009761-T01-IM5 | Head and Neck Cancer   | E545K,E579K                                     |
| P-0029015-T01-IM6 | Head and Neck Cancer   | E545K,E542K                                     |
| P-0002411-T01-IM3 | Head and Neck Cancer   | E545K,D538Y                                     |
| P-0024866-T01-IM6 | Head and Neck Cancer   | E545K,E542K,D549N                               |
| P-0032593-T01-IM6 | Head and Neck Cancer   | N1044K,E453del                                  |
| P-0002286-T01-IM3 | Hepatobiliary Cancer   | E545K,C420R                                     |
| P-0023198-T01-IM6 | Hepatobiliary Cancer   | E545K,E81K                                      |
| P-0028463-T01-IM6 | Hepatobiliary Cancer   | E545K,D549V                                     |

|                   |                            |                       |
|-------------------|----------------------------|-----------------------|
| P-0009189-T01-IM5 | Melanoma                   | S67F,L402F            |
| P-0009752-T01-IM5 | Melanoma                   | H14Y,S326F            |
| P-0021394-T01-IM6 | Melanoma                   | E545K,C420R           |
| P-0009431-T01-IM5 | Non-Small Cell Lung Cancer | E81K,R93W             |
| P-0021735-T01-IM6 | Non-Small Cell Lung Cancer | H1047R,G118V          |
| P-0022891-T03-IM6 | Non-Small Cell Lung Cancer | H1047R,E726K          |
| P-0023265-T01-IM6 | Non-Small Cell Lung Cancer | E545K,E542K           |
| P-0032172-T01-IM6 | Non-Small Cell Lung Cancer | E542K,M318V           |
| P-0003551-T02-IM6 | Non-Small Cell Lung Cancer | E545K,E542K           |
| P-0011388-T01-IM5 | Non-Small Cell Lung Cancer | D1029H,D1045N,E982Q   |
| P-0012580-T01-IM5 | Non-Small Cell Lung Cancer | E726K,H1065L          |
| P-0018244-T01-IM6 | Non-Small Cell Lung Cancer | E542K,P471A           |
| P-0024921-T01-IM6 | Non-Small Cell Lung Cancer | P217A,N444I           |
| P-0027048-T01-IM6 | Non-Small Cell Lung Cancer | H450_I459del,G460S    |
| P-0028051-T01-IM6 | Non-Small Cell Lung Cancer | A77V,A415Cfs*2        |
| P-0032292-T01-IM6 | Non-Small Cell Lung Cancer | E542K,E453K           |
| P-0032614-T01-IM6 | Non-Small Cell Lung Cancer | E545K,E542K           |
| P-0033200-T01-IM6 | Non-Small Cell Lung Cancer | E542K,D214Y           |
| P-0029643-T01-IM6 | Ovarian Cancer             | V344M,R115L           |
| P-0001105-T01-IM3 | Ovarian Cancer             | R108H,C378F           |
| P-0031332-T01-IM6 | Ovarian Cancer             | H1047Y,E545D          |
| P-0026409-T01-IM6 | Prostate Cancer            | E542K,I1058L          |
| P-0025880-T01-IM6 | Prostate Cancer            | E545K,H1047L          |
| P-0000957-T01-IM3 | Salivary Gland Cancer      | M1004I,*1069Ffs*5     |
| P-0001198-T01-IM3 | Skin Cancer, Non-Melanoma  | E542K,C24S,S66F,W780* |
| P-0018328-T01-IM6 | Skin Cancer, Non-Melanoma  | H1047R,E726K          |
| P-0018382-T01-IM6 | Small Bowel Cancer         | R88Q,Q546R            |
| P-0032985-T01-IM6 | Small Bowel Cancer         | K111E,N107H           |
| P-0031236-T01-IM6 | Soft Tissue Sarcoma        | H1047R,E365K          |
| P-0003178-T01-IM5 | Thyroid Cancer             | H1047R,E542K          |
| P-0032729-T02-IM6 | Thyroid Cancer             | N345K,H1047Y          |



**Table S3: Double *PIK3CA* mutant breast tumours phased as *cis* or *trans* mutants, by NGS (MSK-IMPACT)**

| Sample ID         | Cancer Type   | <i>PIK3CA</i> Mutation (gDNA) | <i>Cis</i> or <i>trans</i> |
|-------------------|---------------|-------------------------------|----------------------------|
| P-0012667-T01-IM5 | Breast Cancer | E385K + D390N                 | <i>Cis</i>                 |
| P-0001902-T01-IM3 | Breast Cancer | E542K + E545D                 | <i>Cis</i>                 |
| P-0014479-T01-IM6 | Breast Cancer | E542Q + E545K                 | <i>Cis</i>                 |
| P-0029802-T01-IM6 | Breast Cancer | E542K + E545K                 | <i>Cis</i>                 |
| P-0022021-T01-IM6 | Breast Cancer | E545K + D549H                 | <i>Cis</i>                 |
| P-0024420-T01-IM6 | Breast Cancer | E545K + D549N                 | <i>Cis</i>                 |
| P-0026885-T01-IM6 | Breast Cancer | M1004I + H1047R               | <i>Cis</i>                 |
| P-0000107-T01-IM3 | Breast Cancer | D1017E + I1019V + Y1021H      | <i>Cis</i>                 |
| P-0021201-T01-IM6 | Breast Cancer | L1036S + M1040T               | <i>Cis</i>                 |
| P-0021040-T01-IM6 | Breast Cancer | H1047R + M1055L               | <i>Cis</i>                 |
| P-0020645-T01-IM6 | Breast Cancer | M1043V + H1047R               | <i>Trans</i>               |

**Table S4: Double *PIK3CA* mutant breast tumours phased as *cis* mutants, by RNA-seq (TCGA)**

| Sample ID                       | Cancer Type   | <i>PIK3CA</i> mutations (RNA, in cis) | Number of reads calling both mutations | Number of reads spanning both loci |
|---------------------------------|---------------|---------------------------------------|----------------------------------------|------------------------------------|
| TCGA-AO-A1KR-01A<br>12D-A142-09 | Breast Cancer | 1004 + 1047                           | 11                                     | 12                                 |
| TCGA-A2-A0EN-01A<br>13D-A099-09 | Breast Cancer | 1047 + 1065                           | 4                                      | 10                                 |

## References and Notes

1. M. H. Bailey, C. Tokheim, E. Porta-Pardo, S. Sengupta, D. Bertrand, A. Weerasinghe, A. Colaprico, M. C. Wendl, J. Kim, B. Reardon, P. Kwok-Shing Ng, K. J. Jeong, S. Cao, Z. Wang, J. Gao, Q. Gao, F. Wang, E. M. Liu, L. Mularoni, C. Rubio-Perez, N. Nagarajan, I. Cortés-Ciriano, D. C. Zhou, W.-W. Liang, J. M. Hess, V. D. Yellapantula, D. Tamborero, A. Gonzalez-Perez, C. Suphavitai, J. Y. Ko, E. Khurana, P. J. Park, E. M. Van Allen, H. Liang, M. S. Lawrence, A. Godzik, N. Lopez-Bigas, J. Stuart, D. Wheeler, G. Getz, K. Chen, A. J. Lazar, G. B. Mills, R. Karchin, L. Ding; MC3 Working Group; Cancer Genome Atlas Research Network, Comprehensive Characterization of Cancer Driver Genes and Mutations. *Cell* **174**, 1034–1035 (2018). [doi:10.1016/j.cell.2018.07.034](https://doi.org/10.1016/j.cell.2018.07.034) [Medline](#)
2. M. Whitman, C. P. Downes, M. Keeler, T. Keller, L. Cantley, Type I phosphatidylinositol kinase makes a novel inositol phospholipid, phosphatidylinositol-3-phosphate. *Nature* **332**, 644–646 (1988). [doi:10.1038/332644a0](https://doi.org/10.1038/332644a0) [Medline](#)
3. D. A. Fruman, H. Chiu, B. D. Hopkins, S. Bagrodia, L. C. Cantley, R. T. Abraham, The PI3K Pathway in Human Disease. *Cell* **170**, 605–635 (2017). [doi:10.1016/j.cell.2017.07.029](https://doi.org/10.1016/j.cell.2017.07.029) [Medline](#)
4. Y. Samuels, Z. Wang, A. Bardelli, N. Silliman, J. Ptak, S. Szabo, H. Yan, A. Gazdar, S. M. Powell, G. J. Riggins, J. K. Willson, S. Markowitz, K. W. Kinzler, B. Vogelstein, V. E. Velculescu, High frequency of mutations of the PIK3CA gene in human cancers. *Science* **304**, 554 (2004). [doi:10.1126/science.1096502](https://doi.org/10.1126/science.1096502) [Medline](#)
5. Y. Samuels, L. A. Diaz Jr., O. Schmidt-Kittler, J. M. Cummins, L. Delong, I. Cheong, C. Rago, D. L. Huso, C. Lengauer, K. W. Kinzler, B. Vogelstein, V. E. Velculescu, Mutant PIK3CA promotes cell growth and invasion of human cancer cells. *Cancer Cell* **7**, 561–573 (2005). [doi:10.1016/j.ccr.2005.05.014](https://doi.org/10.1016/j.ccr.2005.05.014) [Medline](#)
6. S. Kang, A. G. Bader, P. K. Vogt, Phosphatidylinositol 3-kinase mutations identified in human cancer are oncogenic. *Proc. Natl. Acad. Sci. U.S.A.* **102**, 802–807 (2005). [doi:10.1073/pnas.0408864102](https://doi.org/10.1073/pnas.0408864102) [Medline](#)
7. S. J. Isakoff, J. A. Engelman, H. Y. Irie, J. Luo, S. M. Brachmann, R. V. Pearline, L. C. Cantley, J. S. Brugge, Breast cancer-associated PIK3CA mutations are oncogenic in mammary epithelial cells. *Cancer Res.* **65**, 10992–11000 (2005). [doi:10.1158/0008-5472.CAN-05-2612](https://doi.org/10.1158/0008-5472.CAN-05-2612) [Medline](#)
8. J. J. Zhao, O. V. Gjoerup, R. R. Subramanian, Y. Cheng, W. Chen, T. M. Roberts, W. C. Hahn, Human mammary epithelial cell transformation through the activation of phosphatidylinositol 3-kinase. *Cancer Cell* **3**, 483–495 (2003). [doi:10.1016/S1535-6108\(03\)00088-6](https://doi.org/10.1016/S1535-6108(03)00088-6) [Medline](#)
9. P. Razavi, M. T. Chang, G. Xu, C. Bandlamudi, D. S. Ross, N. Vasani, Y. Cai, C. M. Bielski, M. T. A. Donoghue, P. Jonsson, A. Penson, R. Shen, F. Pareja, R. Kundra, S. Middha, M. L. Cheng, A. Zehir, C. Kandath, R. Patel, K. Huberman, L. M. Smyth, K. Jhaveri, S. Modi, T. A. Traina, C. Dang, W. Zhang, B. Weigelt, B. T. Li, M. Ladanyi, D. M. Hyman, N. Schultz, M. E. Robson, C. Hudis, E. Brogi, A. Viale, L. Norton, M. N. Dickler, M. F. Berger, C. A. Iacobuzio-Donahue, S. Chandralapaty, M. Scaltriti, J. S. Reis-Filho, D. B.

- Solit, B. S. Taylor, J. Baselga, The Genomic Landscape of Endocrine-Resistant Advanced Breast Cancers. *Cancer Cell* **34**, 427–438.e6 (2018).  
[doi:10.1016/j.ccell.2018.08.008](https://doi.org/10.1016/j.ccell.2018.08.008) [Medline](#)
10. J. Baselga, S.-A. Im, H. Iwata, J. Cortés, M. De Laurentiis, Z. Jiang, C. L. Arteaga, W. Jonat, M. Clemons, Y. Ito, A. Awada, S. Chia, A. Jagiełło-Gruszfeld, B. Pistilli, L.-M. Tseng, S. Hurvitz, N. Masuda, M. Takahashi, P. Vuylsteke, S. Hachemi, B. Dharan, E. Di Tomaso, P. Urban, C. Massacesi, M. Campone, Buparlisib plus fulvestrant versus placebo plus fulvestrant in postmenopausal, hormone receptor-positive, HER2-negative, advanced breast cancer (BELLE-2): A randomised, double-blind, placebo-controlled, phase 3 trial. *Lancet Oncol.* **18**, 904–916 (2017). [doi:10.1016/S1470-2045\(17\)30376-5](https://doi.org/10.1016/S1470-2045(17)30376-5) [Medline](#)
  11. A. Di Leo, S. Johnston, K. S. Lee, E. Ciruelos, P. E. Lønning, W. Janni, R. O'Regan, M.-A. Mouret-Reynier, D. Kalev, D. Egle, T. Csőszi, R. Bordonaro, T. Decker, V. C. G. Tjan-Heijnen, S. Blau, A. Schirone, D. Weber, M. El-Hashimy, B. Dharan, D. Sellami, T. Bachelot, Buparlisib plus fulvestrant in postmenopausal women with hormone-receptor-positive, HER2-negative, advanced breast cancer progressing on or after mTOR inhibition (BELLE-3): A randomised, double-blind, placebo-controlled, phase 3 trial. *Lancet Oncol.* **19**, 87–100 (2018). [doi:10.1016/S1470-2045\(17\)30688-5](https://doi.org/10.1016/S1470-2045(17)30688-5) [Medline](#)
  12. J. Baselga, S. F. Dent, J. Cortés, Y.-H. Im, V. Diéras, N. Harbeck, I. E. Krop, S. Verma, T. R. Wilson, H. Jin, L. Wang, F. Schimmoller, J. Y. Hsu, J. He, M. DeLaurentiis, P. Drullinsky, W. Jacot, Phase III study of tasisib (GDC-0032) + fulvestrant (FULV) v FULV in patients (pts) with estrogen receptor (ER)-positive, PIK3CA-mutant (MUT), locally advanced or metastatic breast cancer (MBC): Primary analysis from SANDPIPER. *J. Clin. Oncol.* **36** (suppl.), LBA1006 (2018).  
[doi:10.1200/JCO.2018.36.18\\_suppl.LBA1006](https://doi.org/10.1200/JCO.2018.36.18_suppl.LBA1006)
  13. C. Saura, D. Hlauschek, M. Oliveira, D. Zardavas, A. Jallitsch-Halper, L. de la Peña, P. Nuciforo, A. Ballestrero, P. Dubsy, J. M. Lombard, P. Vuylsteke, C. A. Castaneda, M. Colleoni, G. Santos Borges, E. Ciruelos, M. Fornier, K. Boer, A. Bardia, T. R. Wilson, T. J. Stout, J. Y. Hsu, Y. Shi, M. Piccart, M. Gnant, J. Baselga, E. de Azambuja, Neoadjuvant letrozole plus tasisib versus letrozole plus placebo in postmenopausal women with oestrogen receptor-positive, HER2-negative, early-stage breast cancer (LORELEI): a multicentre, randomised, double-blind, placebo-controlled, phase 2 trial. *Lancet Oncol.* **20**, 1226–1238 (2019). [doi:10.1016/S1470-2045\(19\)30334-1](https://doi.org/10.1016/S1470-2045(19)30334-1)
  14. D. Juric, J. Rodon, J. Tabernero, F. Janku, H. A. Burris, J. H. M. Schellens, M. R. Middleton, J. Berlin, M. Schuler, M. Gil-Martin, H. S. Rugo, R. Seggewiss-Bernhardt, A. Huang, D. Bootle, D. Demanse, L. Blumenstein, C. Coughlin, C. Quadt, J. Baselga, Phosphatidylinositol 3-Kinase  $\alpha$ -Selective Inhibition With Alpelisib (BYL719) in PIK3CA-Altered Solid Tumors: Results From the First-in-Human Study. *J. Clin. Oncol.* **36**, 1291–1299 (2018). [doi:10.1200/JCO.2017.72.7107](https://doi.org/10.1200/JCO.2017.72.7107) [Medline](#)
  15. I. A. Mayer, V. G. Abramson, L. Formisano, J. M. Balko, M. V. Estrada, M. E. Sanders, D. Juric, D. Solit, M. F. Berger, H. H. Won, Y. Li, L. C. Cantley, E. Winer, C. L. Arteaga, A Phase Ib Study of Alpelisib (BYL719), a PI3K $\alpha$ -Specific Inhibitor, with Letrozole in ER+/HER2- Metastatic Breast Cancer. *Clin. Cancer Res.* **23**, 26–34 (2017).  
[doi:10.1158/1078-0432.CCR-16-0134](https://doi.org/10.1158/1078-0432.CCR-16-0134) [Medline](#)

16. D. Juric, F. Janku, J. Rodón, H. A. Burris, I. A. Mayer, M. Schuler, R. Seggewiss-Bernhardt, M. Gil-Martin, M. R. Middleton, J. Baselga, D. Bootle, D. Demanase, L. Blumenstein, K. Schumacher, A. Huang, C. Quadt, H. S. Rugo, Alpelisib Plus Fulvestrant in PIK3CA-Altered and PIK3CA-Wild-Type Estrogen Receptor-Positive Advanced Breast Cancer: A Phase 1b Clinical Trial. *JAMA Oncol.* **5**, e184475 (2019).  
[doi:10.1001/jamaoncol.2018.4475](https://doi.org/10.1001/jamaoncol.2018.4475) [Medline](#)
17. F. André, E. Ciruelos, G. Rubovszky, M. Campone, S. Loibl, H. S. Rugo, H. Iwata, P. Conte, I. A. Mayer, B. Kaufman, T. Yamashita, Y.-S. Lu, K. Inoue, M. Takahashi, Z. Pápai, A.-S. Longin, D. Mills, C. Wilke, S. Hirawat, D. Juric; SOLAR-1 Study Group, Alpelisib for PIK3CA-Mutated, Hormone Receptor-Positive Advanced Breast Cancer. *N. Engl. J. Med.* **380**, 1929–1940 (2019). [doi:10.1056/NEJMoa1813904](https://doi.org/10.1056/NEJMoa1813904) [Medline](#)
18. D. Juric, P. Castel, M. Griffith, O. L. Griffith, H. H. Won, H. Ellis, S. H. Ebbesen, B. J. Ainscough, A. Ramu, G. Iyer, R. H. Shah, T. Huynh, M. Mino-Kenudson, D. Sgroi, S. Isakoff, A. Thabet, L. Elamine, D. B. Solit, S. W. Lowe, C. Quadt, M. Peters, A. Derti, R. Schegel, A. Huang, E. R. Mardis, M. F. Berger, J. Baselga, M. Scaltriti, Convergent loss of PTEN leads to clinical resistance to a PI(3)K $\alpha$  inhibitor. *Nature* **518**, 240–244 (2015).  
[doi:10.1038/nature13948](https://doi.org/10.1038/nature13948) [Medline](#)
19. D. T. Cheng, T. N. Mitchell, A. Zehir, R. H. Shah, R. Benayed, A. Syed, R. Chandramohan, Z. Y. Liu, H. H. Won, S. N. Scott, A. R. Brannon, C. O'Reilly, J. Sadowska, J. Casanova, A. Yannes, J. F. Hechtman, J. Yao, W. Song, D. S. Ross, A. Oultache, S. Dogan, L. Borsu, M. Hameed, K. Nafa, M. E. Arcila, M. Ladanyi, M. F. Berger, Memorial Sloan Kettering-Integrated Mutation Profiling of Actionable Cancer Targets (MSK-IMPACT): A Hybridization Capture-Based Next-Generation Sequencing Clinical Assay for Solid Tumor Molecular Oncology. *J. Mol. Diagn.* **17**, 251–264 (2015).  
[doi:10.1016/j.jmoldx.2014.12.006](https://doi.org/10.1016/j.jmoldx.2014.12.006) [Medline](#)
20. E. Cerami, J. Gao, U. Dogrusoz, B. E. Gross, S. O. Sumer, B. A. Aksoy, A. Jacobsen, C. J. Byrne, M. L. Heuer, E. Larsson, Y. Antipin, B. Reva, A. P. Goldberg, C. Sander, N. Schultz, The cBio cancer genomics portal: An open platform for exploring multidimensional cancer genomics data. *Cancer Discov.* **2**, 401–404 (2012).  
[doi:10.1158/2159-8290.CD-12-0095](https://doi.org/10.1158/2159-8290.CD-12-0095) [Medline](#)
21. J. Gao, B. A. Aksoy, U. Dogrusoz, G. Dresdner, B. Gross, S. O. Sumer, Y. Sun, A. Jacobsen, R. Sinha, E. Larsson, E. Cerami, C. Sander, N. Schultz, Integrative analysis of complex cancer genomics and clinical profiles using the cBioPortal. *Sci. Signal.* **6**, p11 (2013).  
[doi:10.1126/scisignal.2004088](https://doi.org/10.1126/scisignal.2004088) [Medline](#)
22. C. Curtis, S. P. Shah, S.-F. Chin, G. Turashvili, O. M. Rueda, M. J. Dunning, D. Speed, A. G. Lynch, S. Samarajiwa, Y. Yuan, S. Gräf, G. Ha, G. Haffari, A. Bashashati, R. Russell, S. McKinney, A. Langerød, A. Green, E. Provenzano, G. Wishart, S. Pinder, P. Watson, F. Markowitz, L. Murphy, I. Ellis, A. Purushotham, A.-L. Børresen-Dale, J. D. Brenton, S. Tavaré, C. Caldas, S. Aparicio; METABRIC Group, The genomic and transcriptomic architecture of 2,000 breast tumours reveals novel subgroups. *Nature* **486**, 346–352 (2012). [doi:10.1038/nature10983](https://doi.org/10.1038/nature10983) [Medline](#)
23. Cancer Genome Atlas Network, Comprehensive molecular portraits of human breast tumours. *Nature* **490**, 61–70 (2012). [doi:10.1038/nature11412](https://doi.org/10.1038/nature11412) [Medline](#)

24. S. Banerji, K. Cibulskis, C. Rangel-Escareno, K. K. Brown, S. L. Carter, A. M. Frederick, M. S. Lawrence, A. Y. Sivachenko, C. Sougnez, L. Zou, M. L. Cortes, J. C. Fernandez-Lopez, S. Peng, K. G. Ardlie, D. Auclair, V. Bautista-Piña, F. Duke, J. Francis, J. Jung, A. Maffuz-Aziz, R. C. Onofrio, M. Parkin, N. H. Pho, V. Quintanar-Jurado, A. H. Ramos, R. Rebollar-Vega, S. Rodriguez-Cuevas, S. L. Romero-Cordoba, S. E. Schumacher, N. Stransky, K. M. Thompson, L. Uribe-Figueroa, J. Baselga, R. Beroukhi, K. Polyak, D. C. Sgroi, A. L. Richardson, G. Jimenez-Sanchez, E. S. Lander, S. B. Gabriel, L. A. Garraway, T. R. Golub, J. Melendez-Zajgla, A. Toket, G. Getz, A. Hidalgo-Miranda, M. Meyerson, Sequence analysis of mutations and translocations across breast cancer subtypes. *Nature* **486**, 405–409 (2012). [doi:10.1038/nature11154](https://doi.org/10.1038/nature11154) [Medline](#)
25. P. J. Stephens, P. S. Tarpey, H. Davies, P. Van Loo, C. Greenman, D. C. Wedge, S. Nik-Zainal, S. Martin, I. Varela, G. R. Bignell, L. R. Yates, E. Papaemmanuil, D. Beare, A. Butler, A. Cheverton, J. Gamble, J. Hinton, M. Jia, A. Jayakumar, D. Jones, C. Latimer, K. W. Lau, S. McLaren, D. J. McBride, A. Menzies, L. Mudie, K. Raine, R. Rad, M. S. Chapman, J. Teague, D. Easton, A. Langerød, M. T. M. Lee, C.-Y. Shen, B. T. K. Tee, B. W. Huimin, A. Broeks, A. C. Vargas, G. Turashvili, J. Martens, A. Fatima, P. Miron, S.-F. Chin, G. Thomas, S. Boyault, O. Mariani, S. R. Lakhani, M. van de Vijver, L. van 't Veer, J. Foekens, C. Desmedt, C. Sotiriou, A. Tutt, C. Caldas, J. S. Reis-Filho, S. A. J. R. Aparicio, A. V. Salomon, A.-L. Børresen-Dale, A. L. Richardson, P. J. Campbell, P. A. Futreal, M. R. Stratton; Oslo Breast Cancer Consortium (OSBREAC), The landscape of cancer genes and mutational processes in breast cancer. *Nature* **486**, 400–404 (2012). [doi:10.1038/nature11017](https://doi.org/10.1038/nature11017) [Medline](#)
26. N. Wagle, C. Painter, E. Anastasio, M. Dunphy, M. McGillicuddy, R. Stoddard, E. Jain, D. Kim, S. Di Lascio, B. N. Tompson, S. Balch, B. Thomas, P. Kumari, S. Johnson, J. Holloway, O. Cohen, E. H. Knelson, K. Larkin, S. Pollock, A. Wong, S. Bahl, S. Maiwald, A. Zimmer, E. O. Baker, J. H. Lapan, S. Sutherland, S. Sassone, V. Adalsteinsson, E. S. Lander, T. R. Golub, Abstract 5371: The Metastatic Breast Cancer Project: Partnering with patients to accelerate progress in cancer research. *Cancer Res.* **78**, 5371 (2018). [doi:10.1158/1538-7445.AM2018-5371](https://doi.org/10.1158/1538-7445.AM2018-5371)
27. R. Shen, V. E. Seshan, FACETS: Allele-specific copy number and clonal heterogeneity analysis tool for high-throughput DNA sequencing. *Nucleic Acids Res.* **44**, e131 (2016). [doi:10.1093/nar/gkw520](https://doi.org/10.1093/nar/gkw520) [Medline](#)
28. J. Eid, A. Fehr, J. Gray, K. Luong, J. Lyle, G. Otto, P. Peluso, D. Rank, P. Baybayan, B. Bettman, A. Bibillo, K. Bjornson, B. Chaudhuri, F. Christians, R. Cicero, S. Clark, R. Dalal, A. Dewinter, J. Dixon, M. Foquet, A. Gaertner, P. Hardenbol, C. Heiner, K. Hester, D. Holden, G. Kearns, X. Kong, R. Kuse, Y. Lacroix, S. Lin, P. Lundquist, C. Ma, P. Marks, M. Maxham, D. Murphy, I. Park, T. Pham, M. Phillips, J. Roy, R. Sebra, G. Shen, J. Sorenson, A. Tomaney, K. Travers, M. Trulson, J. Vieceli, J. Wegener, D. Wu, A. Yang, D. Zaccarin, P. Zhao, F. Zhong, J. Korf, S. Turner, Real-time DNA sequencing from single polymerase molecules. *Science* **323**, 133–138 (2009). [doi:10.1126/science.1162986](https://doi.org/10.1126/science.1162986) [Medline](#)
29. Y. Zhang, P. Kwok-Shing Ng, M. Kucherlapati, F. Chen, Y. Liu, Y. H. Tsang, G. de Velasco, K. J. Jeong, R. Akbani, A. Hadjipanayis, A. Pantazi, C. A. Bristow, E. Lee, H.

- S. Mahadeshwar, J. Tang, J. Zhang, L. Yang, S. Seth, S. Lee, X. Ren, X. Song, H. Sun, J. Seidman, L. J. Luquette, R. Xi, L. Chin, A. Protopopov, T. F. Westbrook, C. S. Shelley, T. K. Choueiri, M. Ittmann, C. Van Waes, J. N. Weinstein, H. Liang, E. P. Henske, A. K. Godwin, P. J. Park, R. Kucherlapati, K. L. Scott, G. B. Mills, D. J. Kwiatkowski, C. J. Creighton, A Pan-Cancer Proteogenomic Atlas of PI3K/AKT/mTOR Pathway Alterations. *Cancer Cell* **31**, 820–832.e3 (2017). [doi:10.1016/j.ccell.2017.04.013](https://doi.org/10.1016/j.ccell.2017.04.013) [Medline](#)
30. L. Zhao, P. K. Vogt, Helical domain and kinase domain mutations in p110 $\alpha$  of phosphatidylinositol 3-kinase induce gain of function by different mechanisms. *Proc. Natl. Acad. Sci. U.S.A.* **105**, 2652–2657 (2008). [doi:10.1073/pnas.0712169105](https://doi.org/10.1073/pnas.0712169105) [Medline](#)
31. T. Ikenoue, F. Kanai, Y. Hikiba, T. Obata, Y. Tanaka, J. Imamura, M. Ohta, A. Jazag, B. Guleng, K. Tateishi, Y. Asaoka, M. Matsumura, T. Kawabe, M. Omata, Functional analysis of PIK3CA gene mutations in human colorectal cancer. *Cancer Res.* **65**, 4562–4567 (2005). [doi:10.1158/0008-5472.CAN-04-4114](https://doi.org/10.1158/0008-5472.CAN-04-4114) [Medline](#)
32. J. A. Beaver, J. P. Gustin, K. H. Yi, A. Rajpurohit, M. Thomas, S. F. Gilbert, D. M. Rosen, B. Ho Park, J. Lauring, PIK3CA and AKT1 mutations have distinct effects on sensitivity to targeted pathway inhibitors in an isogenic luminal breast cancer model system. *Clin. Cancer Res.* **19**, 5413–5422 (2013). [doi:10.1158/1078-0432.CCR-13-0884](https://doi.org/10.1158/1078-0432.CCR-13-0884) [Medline](#)
33. I. M. Berenjeno, R. Piñeiro, S. D. Castillo, W. Pearce, N. McGranahan, S. M. Dewhurst, V. Meniel, N. J. Birkbak, E. Lau, L. Sansregret, D. Morelli, N. Kanu, S. Srinivas, M. Graupera, V. E. R. Parker, K. G. Montgomery, L. S. Moniz, C. L. Scudamore, W. A. Phillips, R. K. Semple, A. Clarke, C. Swanton, B. Vanhaesebroeck, Oncogenic PIK3CA induces centrosome amplification and tolerance to genome doubling. *Nat. Commun.* **8**, 1773 (2017). [doi:10.1038/s41467-017-02002-4](https://doi.org/10.1038/s41467-017-02002-4) [Medline](#)
34. K. M. Kinross, K. G. Montgomery, M. Kleinschmidt, P. Waring, I. Ivetac, A. Tikoo, M. Saad, L. Hare, V. Roh, T. Mantamadiotis, K. E. Sheppard, G. L. Ryland, I. G. Campbell, K. L. Gorringer, J. G. Christensen, C. Cullinane, R. J. Hicks, R. B. Pearson, R. W. Johnstone, G. A. McArthur, W. A. Phillips, An activating Pik3ca mutation coupled with Pten loss is sufficient to initiate ovarian tumorigenesis in mice. *J. Clin. Invest.* **122**, 553–557 (2012). [doi:10.1172/JCI59309](https://doi.org/10.1172/JCI59309) [Medline](#)
35. C. H. Huang, D. Mandelker, O. Schmidt-Kittler, Y. Samuels, V. E. Velculescu, K. W. Kinzler, B. Vogelstein, S. B. Gabelli, L. M. Amzel, The structure of a human p110 $\alpha$ /p85 $\alpha$  complex elucidates the effects of oncogenic PI3K $\alpha$  mutations. *Science* **318**, 1744–1748 (2007). [doi:10.1126/science.1150799](https://doi.org/10.1126/science.1150799) [Medline](#)
36. J. Yu, Y. Zhang, J. McIlroy, T. Rordorf-Nikolic, G. A. Orr, J. M. Backer, Regulation of the p85/p110 phosphatidylinositol 3'-kinase: Stabilization and inhibition of the p110 $\alpha$  catalytic subunit by the p85 regulatory subunit. *Mol. Cell. Biol.* **18**, 1379–1387 (1998). [doi:10.1128/MCB.18.3.1379](https://doi.org/10.1128/MCB.18.3.1379) [Medline](#)
37. J. E. Burke, O. Perisic, G. R. Masson, O. Vadas, R. L. Williams, Oncogenic mutations mimic and enhance dynamic events in the natural activation of phosphoinositide 3-kinase p110 $\alpha$  (PIK3CA). *Proc. Natl. Acad. Sci. U.S.A.* **109**, 15259–15264 (2012). [doi:10.1073/pnas.1205508109](https://doi.org/10.1073/pnas.1205508109) [Medline](#)
38. D. Mandelker, S. B. Gabelli, O. Schmidt-Kittler, J. Zhu, I. Cheong, C.-H. Huang, K. W. Kinzler, B. Vogelstein, L. M. Amzel, A frequent kinase domain mutation that changes



- the interaction between PI3K $\alpha$  and the membrane. *Proc. Natl. Acad. Sci. U.S.A.* **106**, 16996–17001 (2009). [doi:10.1073/pnas.0908444106](https://doi.org/10.1073/pnas.0908444106) [Medline](#)
39. M. S. Miller, O. Schmidt-Kittler, D. M. Bolduc, E. T. Brower, D. Chaves-Moreira, M. Allaire, K. W. Kinzler, I. G. Jennings, P. E. Thompson, P. A. Cole, L. M. Amzel, B. Vogelstein, S. B. Gabelli, Structural basis of nSH2 regulation and lipid binding in PI3K $\alpha$ . *Oncotarget* **5**, 5198–5208 (2014). [doi:10.18632/oncotarget.2263](https://doi.org/10.18632/oncotarget.2263) [Medline](#)
40. S. Maheshwari, M. S. Miller, R. O’Meally, R. N. Cole, L. M. Amzel, S. B. Gabelli, Kinetic and structural analyses reveal residues in phosphoinositide 3-kinase  $\alpha$  that are critical for catalysis and substrate recognition. *J. Biol. Chem.* **292**, 13541–13550 (2017). [doi:10.1074/jbc.M116.772426](https://doi.org/10.1074/jbc.M116.772426) [Medline](#)
41. S. Croessmann, J. H. Sheehan, K. M. Lee, G. Sliwoski, J. He, R. Nagy, D. Riddle, I. A. Mayer, J. M. Balko, R. Lanman, V. A. Miller, L. C. Cantley, J. Meiler, C. L. Arteaga, *PIK3CA* C2 Domain Deletions Hyperactivate Phosphoinositide 3-kinase (PI3K), Generate Oncogene Dependence, and Are Exquisitely Sensitive to PI3K $\alpha$  Inhibitors. *Clin. Cancer Res.* **24**, 1426–1435 (2018). [doi:10.1158/1078-0432.CCR-17-2141](https://doi.org/10.1158/1078-0432.CCR-17-2141) [Medline](#)
42. W. C. Hon, A. Berndt, R. L. Williams, Regulation of lipid binding underlies the activation mechanism of class IA PI3-kinases. *Oncogene* **31**, 3655–3666 (2012). [doi:10.1038/onc.2011.532](https://doi.org/10.1038/onc.2011.532) [Medline](#)
43. B. J. Druker, S. Tamura, E. Buchdunger, S. Ohno, G. M. Segal, S. Fanning, J. Zimmermann, N. B. Lydon, Effects of a selective inhibitor of the Abl tyrosine kinase on the growth of Bcr-Abl positive cells. *Nat. Med.* **2**, 561–566 (1996). [doi:10.1038/nm0596-561](https://doi.org/10.1038/nm0596-561) [Medline](#)
44. S. V. Sharma, J. Settleman, Oncogene addiction: Setting the stage for molecularly targeted cancer therapy. *Genes Dev.* **21**, 3214–3231 (2007). [doi:10.1101/gad.1609907](https://doi.org/10.1101/gad.1609907) [Medline](#)
45. K. Edgar, E. Hanan, S. Staben, S. Schmidt, R. Hong, K. Song, A. Young, P. Hamilton, A. Arrazate, C. de la Cruz, M. Belvin, M. Nannini, L. S. Friedman, D. Sampath, Abstract 156: Preclinical characterization of GDC-0077, a specific PI3K alpha inhibitor in early clinical development. *Cancer Res.* **77**, 156 (2017). [doi:10.1158/1538-7445.AM2017-156](https://doi.org/10.1158/1538-7445.AM2017-156)
46. M. Fallahi-Sichani, S. Honarnejad, L. M. Heiser, J. W. Gray, P. K. Sorger, Metrics other than potency reveal systematic variation in responses to cancer drugs. *Nat. Chem. Biol.* **9**, 708–714 (2013). [doi:10.1038/nchembio.1337](https://doi.org/10.1038/nchembio.1337) [Medline](#)
47. V. M. Singh, R. C. Salunga, V. J. Huang, Y. Tran, M. Erlander, P. Plumlee, M. R. Peterson, Analysis of the effect of various decalcification agents on the quantity and quality of nucleic acid (DNA and RNA) recovered from bone biopsies. *Ann. Diagn. Pathol.* **17**, 322–326 (2013). [doi:10.1016/j.anndiagpath.2013.02.001](https://doi.org/10.1016/j.anndiagpath.2013.02.001) [Medline](#)
48. J. Baselga, M. Campone, M. Piccart, H. A. Burris 3rd, H. S. Rugo, T. Sahmoud, S. Noguchi, M. Gnant, K. I. Pritchard, F. Lebrun, J. T. Beck, Y. Ito, D. Yardley, I. Deleu, A. Perez, T. Bachelot, L. Vittori, Z. Xu, P. Mukhopadhyay, D. Lebwahl, G. N. Hortobagyi, Everolimus in postmenopausal hormone-receptor-positive advanced breast cancer. *N. Engl. J. Med.* **366**, 520–529 (2012). [doi:10.1056/NEJMoal109653](https://doi.org/10.1056/NEJMoal109653) [Medline](#)
49. N. C. Turner, J. Ro, F. André, S. Loi, S. Verma, H. Iwata, N. Harbeck, S. Loibl, C. Huang Bartlett, K. Zhang, C. Giorgetti, S. Randolph, M. Koehler, M. Cristofanilli; PALOMA3



- Study Group, Palbociclib in Hormone-Receptor-Positive Advanced Breast Cancer. *N. Engl. J. Med.* **373**, 209–219 (2015). [doi:10.1056/NEJMoa1505270](https://doi.org/10.1056/NEJMoa1505270) [Medline](#)
50. E. A. Eisenhauer, P. Therasse, J. Bogaerts, L. H. Schwartz, D. Sargent, R. Ford, J. Dancey, S. Arbuck, S. Gwyther, M. Mooney, L. Rubinstein, L. Shankar, L. Dodd, R. Kaplan, D. Lacombe, J. Verweij, New response evaluation criteria in solid tumours: Revised RECIST guideline (version 1.1). *Eur. J. Cancer* **45**, 228–247 (2009). [doi:10.1016/j.ejca.2008.10.026](https://doi.org/10.1016/j.ejca.2008.10.026) [Medline](#)
51. C. Kandoth, M. D. McLellan, F. Vandin, K. Ye, B. Niu, C. Lu, M. Xie, Q. Zhang, J. F. McMichael, M. A. Wyczalkowski, M. D. M. Leiserson, C. A. Miller, J. S. Welch, M. J. Walter, M. C. Wendl, T. J. Ley, R. K. Wilson, B. J. Raphael, L. Ding, Mutational landscape and significance across 12 major cancer types. *Nature* **502**, 333–339 (2013). [doi:10.1038/nature12634](https://doi.org/10.1038/nature12634) [Medline](#)
52. I. B. Weinstein, A. K. Joe, Mechanisms of disease: Oncogene addiction—a rationale for molecular targeting in cancer therapy. *Nat. Clin. Pract. Oncol.* **3**, 448–457 (2006). [doi:10.1038/ncponc0558](https://doi.org/10.1038/ncponc0558) [Medline](#)
53. P. Zhou, W. Jiang, Y. J. Zhang, S. M. Kahn, I. Schieren, R. M. Santella, I. B. Weinstein, Antisense to cyclin D1 inhibits growth and reverses the transformed phenotype of human esophageal cancer cells. *Oncogene* **11**, 571–580 (1995). [Medline](#)
54. D. J. Slamon, B. Leyland-Jones, S. Shak, H. Fuchs, V. Paton, A. Bajamonde, T. Fleming, W. Eiermann, J. Wolter, M. Pegram, J. Baselga, L. Norton, Use of chemotherapy plus a monoclonal antibody against HER2 for metastatic breast cancer that overexpresses HER2. *N. Engl. J. Med.* **344**, 783–792 (2001). [doi:10.1056/NEJM200103153441101](https://doi.org/10.1056/NEJM200103153441101) [Medline](#)
55. B. J. Druker, M. Talpaz, D. J. Resta, B. Peng, E. Buchdunger, J. M. Ford, N. B. Lydon, H. Kantarjian, R. Capdeville, S. Ohno-Jones, C. L. Sawyers, Efficacy and safety of a specific inhibitor of the BCR-ABL tyrosine kinase in chronic myeloid leukemia. *N. Engl. J. Med.* **344**, 1031–1037 (2001). [doi:10.1056/NEJM200104053441401](https://doi.org/10.1056/NEJM200104053441401) [Medline](#)
56. T. J. Lynch, D. W. Bell, R. Sordella, S. Gurubhagavatula, R. A. Okimoto, B. W. Brannigan, P. L. Harris, S. M. Haserlat, J. G. Supko, F. G. Haluska, D. N. Louis, D. C. Christiani, J. Settleman, D. A. Haber, Activating mutations in the epidermal growth factor receptor underlying responsiveness of non-small-cell lung cancer to gefitinib. *N. Engl. J. Med.* **350**, 2129–2139 (2004). [doi:10.1056/NEJMoa040938](https://doi.org/10.1056/NEJMoa040938) [Medline](#)
57. C. O. Ndubaku, T. P. Heffron, S. T. Staben, M. Baumgardner, N. Blaquiere, E. Bradley, R. Bull, S. Do, J. Dotson, D. Dudley, K. A. Edgar, L. S. Friedman, R. Goldsmith, R. A. Heald, A. Kolesnikov, L. Lee, C. Lewis, M. Nannini, J. Nonomiya, J. Pang, S. Price, W. W. Prior, L. Salphati, S. Sideris, J. J. Wallin, L. Wang, B. Wei, D. Sampath, A. G. Olivero, Discovery of 2-{3-[2-(1-isopropyl-3-methyl-1H-1,2,4-triazol-5-yl)-5,6-dihydrobenzo[f]imidazo[1,2-d][1,4]oxazepin-9-yl]-1H-pyrazol-1-yl}-2-methylpropanamide (GDC-0032): A beta-sparing phosphoinositide 3-kinase inhibitor with high unbound exposure and robust in vivo antitumor activity. *J. Med. Chem.* **56**, 4597–4610 (2013). [doi:10.1021/jm4003632](https://doi.org/10.1021/jm4003632) [Medline](#)
58. L. H. Saal, K. Holm, M. Maurer, L. Memeo, T. Su, X. Wang, J. S. Yu, P.-O. Malmström, M. Mansukhani, J. Enoksson, H. Hibshoosh, A. Borg, R. Parsons, PIK3CA mutations

- correlate with hormone receptors, node metastasis, and ERBB2, and are mutually exclusive with PTEN loss in human breast carcinoma. *Cancer Res.* **65**, 2554–2559 (2005). [doi:10.1158/0008-5472-CAN-04-3913](https://doi.org/10.1158/0008-5472.CAN-04-3913) [Medline](#)
59. T. L. Yuan, L. C. Cantley, PI3K pathway alterations in cancer: Variations on a theme. *Oncogene* **27**, 5497–5510 (2008). [doi:10.1038/onc.2008.245](https://doi.org/10.1038/onc.2008.245) [Medline](#)
60. K. Jhaveri, D. Juric, C. Saura, A. Cervantes, A. Melnyk, M. R. Patel, M. Oliveira, V. Gambardella, V. Ribrag, C. X. Ma, R. Aljumaily, P. L. Bedard, J. C. Sachdev, J. Bond, S. Jones, T. R. Wilson, M. C. Wei, J. Baselga, Abstract CT046: A phase I basket study of the PI3K inhibitor taselisib (GDC-0032) in *PIK3CA*-mutated locally advanced or metastatic solid tumors. *Cancer Res.* **78**, CT046 (2018). [doi:10.1158/1538-7445.AM2018-CT046](https://doi.org/10.1158/1538-7445.AM2018-CT046)
61. A. Zehir, R. Benayed, R. H. Shah, A. Syed, S. Middha, H. R. Kim, P. Srinivasan, J. Gao, D. Chakravarty, S. M. Devlin, M. D. Hellmann, D. A. Barron, A. M. Schram, M. Hameed, S. Dogan, D. S. Ross, J. F. Hechtman, D. F. DeLair, J. Yao, D. L. Mandelker, D. T. Cheng, R. Chandramohan, A. S. Mohanty, R. N. Ptashkin, G. Jayakumaran, M. Prasad, M. H. Syed, A. B. Rema, Z. Y. Liu, K. Nafa, L. Borsu, J. Sadowska, J. Casanova, R. Bacares, I. J. Kiecka, A. Razumova, J. B. Son, L. Stewart, T. Baldi, K. A. Mullaney, H. Al-Ahmadie, E. Vakiani, A. A. Abeshouse, A. V. Penson, P. Jonsson, N. Camacho, M. T. Chang, H. H. Won, B. E. Gross, R. Kundra, Z. J. Heins, H.-W. Chen, S. Phillips, H. Zhang, J. Wang, A. Ochoa, J. Wills, M. Eubank, S. B. Thomas, S. M. Gardos, D. N. Reales, J. Galle, R. Durany, R. Cambria, W. Abida, A. Cercek, D. R. Feldman, M. M. Gounder, A. A. Hakimi, J. J. Harding, G. Iyer, Y. Y. Janjigian, E. J. Jordan, C. M. Kelly, M. A. Lowery, L. G. T. Morris, A. M. Omuro, N. Raj, P. Razavi, A. N. Shoushtari, N. Shukla, T. E. Soumerai, A. M. Varghese, R. Yaeger, J. Coleman, B. Bochner, G. J. Riely, L. B. Saltz, H. I. Scher, P. J. Sabbatini, M. E. Robson, D. S. Klimstra, B. S. Taylor, J. Baselga, N. Schultz, D. M. Hyman, M. E. Arcila, D. B. Solit, M. Ladanyi, M. F. Berger, Mutational landscape of metastatic cancer revealed from prospective clinical sequencing of 10,000 patients. *Nat. Med.* **23**, 703–713 (2017). [doi:10.1038/nm.4333](https://doi.org/10.1038/nm.4333) [Medline](#)
62. H. Li, B. Handsaker, A. Wysoker, T. Fennell, J. Ruan, N. Homer, G. Marth, G. Abecasis, R. Durbin; 1000 Genome Project Data Processing Subgroup, The Sequence Alignment/Map format and SAMtools. *Bioinformatics* **25**, 2078–2079 (2009). [doi:10.1093/bioinformatics/btp352](https://doi.org/10.1093/bioinformatics/btp352) [Medline](#)
63. S. L. Carter, K. Cibulskis, E. Helman, A. McKenna, H. Shen, T. Zack, P. W. Laird, R. C. Onofrio, W. Winckler, B. A. Weir, R. Beroukhim, D. Pellman, D. A. Levine, E. S. Lander, M. Meyerson, G. Getz, Absolute quantification of somatic DNA alterations in human cancer. *Nat. Biotechnol.* **30**, 413–421 (2012). [doi:10.1038/nbt.2203](https://doi.org/10.1038/nbt.2203) [Medline](#)
64. F. Bertucci, C. K. Y. Ng, A. Patsouris, N. Droin, S. Piscuoglio, N. Carbuccia, J. C. Soria, A. T. Dien, Y. Adnani, M. Kamal, S. Garnier, G. Meurice, M. Jimenez, S. Dogan, B. Verret, M. Chaffanet, T. Bachelot, M. Campone, C. Lefeuvre, H. Bonnefoi, F. Dalenc, A. Jacquet, M. R. De Filippo, N. Babbar, D. Birnbaum, T. Filleron, C. Le Tourneau, F. André, Genomic characterization of metastatic breast cancers. *Nature* **569**, 560–564 (2019). [doi:10.1038/s41586-019-1056-z](https://doi.org/10.1038/s41586-019-1056-z) [Medline](#)
65. C. A. Hudis, W. E. Barlow, J. P. Costantino, R. J. Gray, K. I. Pritchard, J.-A. W. Chapman, J. A. Sparano, S. Hunsberger, R. A. Enos, R. D. Gelber, J. A. Zujewski, Proposal for

- standardized definitions for efficacy end points in adjuvant breast cancer trials: The STEEP system. *J. Clin. Oncol.* **25**, 2127–2132 (2007). [doi:10.1200/JCO.2006.10.3523](https://doi.org/10.1200/JCO.2006.10.3523) [Medline](#)
66. J. D. Kalbfleisch, R. L. Prentice, *The Statistical Analysis of Failure Time Data* (Wiley, ed. 2, 2002).
67. M. Sun, J. R. Hart, P. Hillmann, M. Gymnopoulos, P. K. Vogt, Addition of N-terminal peptide sequences activates the oncogenic and signaling potentials of the catalytic subunit p110 $\alpha$  of phosphoinositide-3-kinase. *Cell Cycle* **10**, 3731–3739 (2011). [doi:10.4161/cc.10.21.17920](https://doi.org/10.4161/cc.10.21.17920) [Medline](#)
68. C. A. Schneider, W. S. Rasband, K. W. Eliceiri, NIH Image to ImageJ: 25 years of image analysis. *Nat. Methods* **9**, 671–675 (2012). [doi:10.1038/nmeth.2089](https://doi.org/10.1038/nmeth.2089) [Medline](#)
69. The PyMOL Molecular Graphics System, Version 1.8 (Schrodinger, 2015).
70. T. A. Clark, J. H. Chung, M. Kennedy, J. D. Hughes, N. Chennagiri, D. S. Lieber, B. Fendler, L. Young, M. Zhao, M. Coyne, V. Breese, G. Young, A. Donahue, D. Pavlick, A. Tsiros, T. Brennan, S. Zhong, T. Mughal, M. Bailey, J. He, S. Roels, G. M. Frampton, J. M. Spoerke, S. Gendreau, M. Lackner, E. Schleifman, E. Peters, J. S. Ross, S. M. Ali, V. A. Miller, J. P. Gregg, P. J. Stephens, A. Welsh, G. A. Otto, D. Lipson, Analytical Validation of a Hybrid Capture-Based Next-Generation Sequencing Clinical Assay for Genomic Profiling of Cell-Free Circulating Tumor DNA. *J. Mol. Diagn.* **20**, 686–702 (2018). [doi:10.1016/j.jmoldx.2018.05.004](https://doi.org/10.1016/j.jmoldx.2018.05.004) [Medline](#)
71. N. A. O’Leary, M. W. Wright, J. R. Brister, S. Ciufu, D. Haddad, R. McVeigh, B. Rajput, B. Robbertse, B. Smith-White, D. Ako-Adjei, A. Astashyn, A. Badretdin, Y. Bao, O. Blinkova, V. Brover, V. Chetvernin, J. Choi, E. Cox, O. Ermolaeva, C. M. Farrell, T. Goldfarb, T. Gupta, D. Haft, E. Hatcher, W. Hlavina, V. S. Joardar, V. K. Kodali, W. Li, D. Maglott, P. Masterson, K. M. McGarvey, M. R. Murphy, K. O’Neill, S. Pujar, S. H. Rangwala, D. Rausch, L. D. Riddick, C. Schoch, A. Shkeda, S. S. Storz, H. Sun, F. Thibaud-Nissen, I. Tolstoy, R. E. Tully, A. R. Vatsan, C. Wallin, D. Webb, W. Wu, M. J. Landrum, A. Kimchi, T. Tatusova, M. DiCuccio, P. Kitts, T. D. Murphy, K. D. Pruitt, Reference sequence (RefSeq) database at NCBI: Current status, taxonomic expansion, and functional annotation. *Nucleic Acids Res.* **44**, D733–D745 (2016). [doi:10.1093/nar/gkv1189](https://doi.org/10.1093/nar/gkv1189) [Medline](#)
